# Supplementary material for: SIRT1 regulates sphingolipid metabolism and neural differentiation of mouse embryonic stem cells through c-Myc-SMPDL3B
Source: eLife journal article supplement (doi:10.7554/elife.67452), 2021-05-27

**Figure 4A**

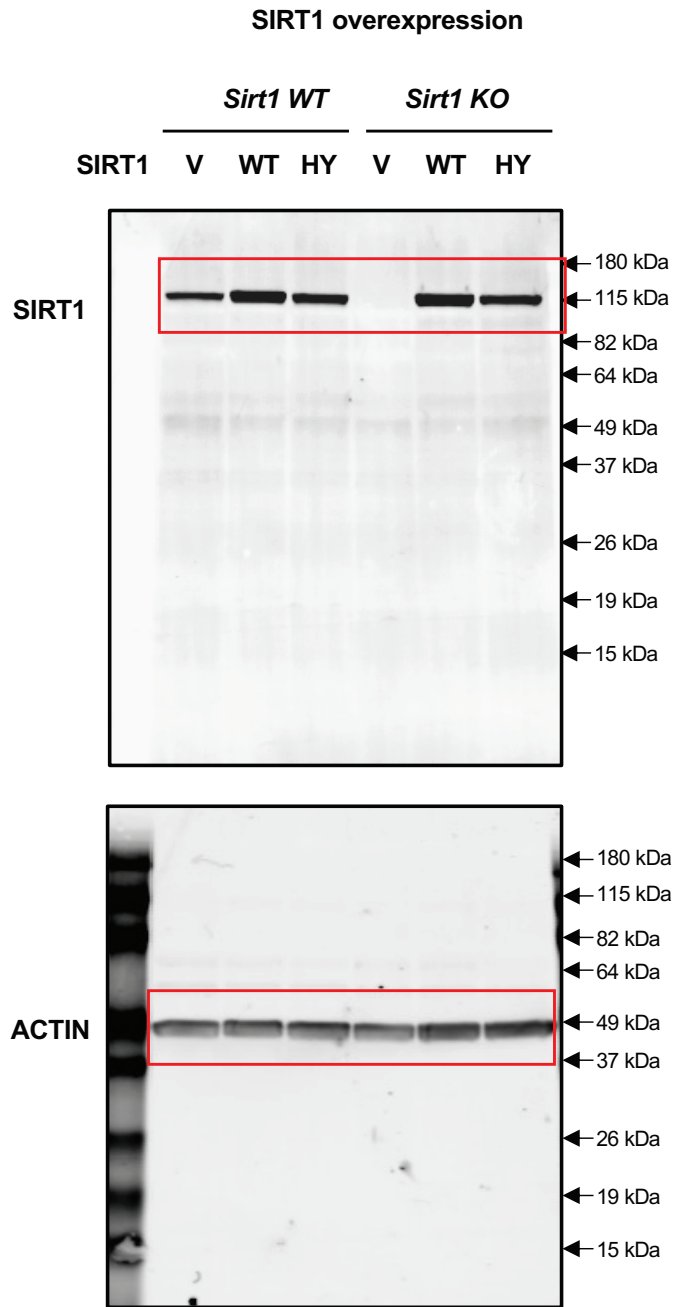

**Figure 4D**

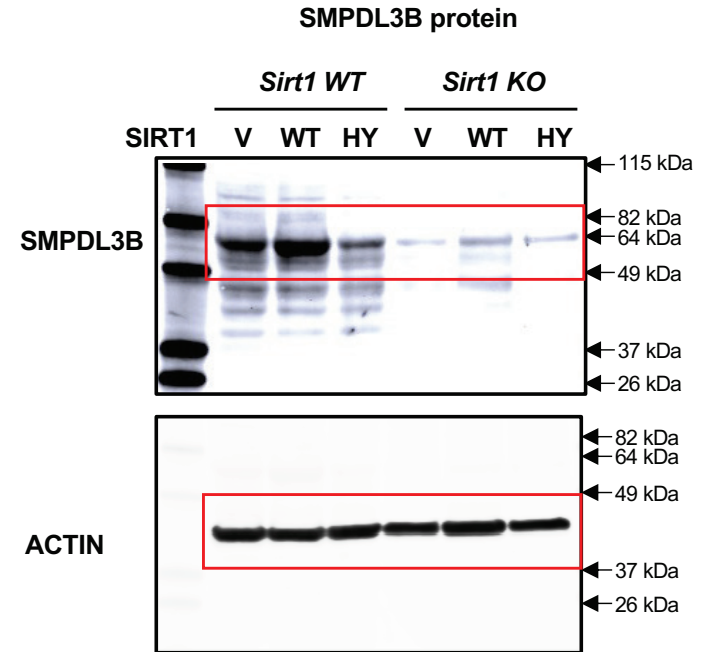

Supplement: fig4-data2 [file elife-67452-fig4-data2-v2.pdf]
