# Supplementary material for: SIRT1 regulates sphingolipid metabolism and neural differentiation of mouse embryonic stem cells through c-Myc-SMPDL3B
Source: eLife. 2021 May 27;10:e67452. doi: 10.7554/eLife.67452 (PMC8216717; doi:10.7554/eLife.67452)
Supplement: Figure 1—source data 1. [file elife-67452-fig1-data1.xlsx]

## Sheet: Figure 1D
Relative BODIPY FL C5-Sphingomyelin Intensity in WT and SIRT1 KO mESCs
	WT	KO
replicate 1	1.04659	1.47668
replicate 2	0.990567	1.46484
replicate 3	0.962847	1.45719

## Sheet: Figure 1E
Relative endogenous sphingomyelin levels in WT and SIRT1 KO mESCs
	WT	KO
replicate 1	1.29416	1.3533
replicate 2	0.96755	1.7466
replicate 3	0.738287	1.68868

## Sheet: Figure 1H
Relative BODIPY FL C5-Sphingomyelin Intensity in E14 WT and SIRT1 KO mESCs
	GC01	A7	B2
replicate 1	1.03606	1.377	1.27029
replicate 2	0.996359	1.31293	1.25537
replicate 3	0.967579	1.30432	1.24508
