# Supplementary material for: SIRT1 regulates sphingolipid metabolism and neural differentiation of mouse embryonic stem cells through c-Myc-SMPDL3B
Source: eLife. 2021 May 27;10:e67452. doi: 10.7554/eLife.67452 (PMC8216717; doi:10.7554/eLife.67452)
Supplement: Figure 2—figure supplement 1—source data 1. [file elife-67452-fig2-figsupp1-data1.xlsx]

## Sheet: Figure 2 FS 1A
Relative mRNA abundance of SMPD enzymes in mESCs
	replicate 1	replicate 2	replicate 3
Smpd1	0.923939	1.09687	0.979194
Smpd2	2.73098	1.9469	2.9441
Smpd3	0.191072	0.758321	0.229364
Smpd4	4.50864	3.93969	4.95593
Smpd5	0.0281613	0.032639	0.0183531
Enpp7	0.590662	0.967068	0.407503
Smpdl3b	3.99677	1.45042	2.4077
