# Supplementary material for: SIRT1 regulates sphingolipid metabolism and neural differentiation of mouse embryonic stem cells through c-Myc-SMPDL3B
Source: eLife. 2021 May 27;10:e67452. doi: 10.7554/eLife.67452 (PMC8216717; doi:10.7554/eLife.67452)
Supplement: Figure 2—source data 1. [file elife-67452-fig2-data1.xlsx]

## Sheet: Figure 2A ESGRO medium
Relative mRNA abundance of sphingomyelin metabolic genes in WT and SIRT1 KO mESCs cultured in ESGRO medium
	WT			KO
	replicate 1	replicate 2	replicate 3	replicate 1	replicate 2	replicate 3
Sgms1	0.847278	1.09757	1.05515	0.852503	1.0721	0.983127
Sgms2	0.928275	1.08142	0.990301	0.628651	0.664992	0.557587
Samd8	0.942314	1.01211	1.04558	1.13379	1.46283	1.42519
Smpd1	0.837947	0.939294	1.22276	1.5088	1.55392	1.72096
Smpd2	0.850296	1.11376	1.03594	1.43648	1.33208	1.53761
Smpd3	1.247	0.745243	1.00775	0.350442	0.960766	0.741846
Smpd4	0.967841	0.999652	1.03251	1.36972	1.17724	1.25234
Smpd5	0.775544	1.24272	0.98174	1.16075	1.69554	1.2142
Enpp7	0.849049	1.1276	1.02335	1.74905	1.77002	1.24449
Smpdl3b	1.23735	0.781181	0.981466	0.313803	0.303897	0.19228

## Sheet: Figure 2A M10 medium
Relative mRNA abundance of sphingomyelin metabolic genes in WT and SIRT1 KO mESCs cultured in M10 medium
	WT			KO
	replicate 1	replicate 2	replicate 3	replicate 1	replicate 2	replicate 3
Sgms1	0.855279	1.16367	0.981053	0.699528	1.15772	0.571002
Sgms2	1.47155	0.612816	0.915635	0.218137	0.2935	0.406476
Samd8	1.32933	0.983117	0.687556	0.322973	0.98947	0.6188
Smpd1	0.927057	1.0928	0.980145	0.87894	1.32535	0.653648
Smpd2	1.07299	0.772987	1.15403	0.686758	1.18717	1.04272
Smpd3	0.491494	1.91976	0.588747	0.591678	1.46923	1.07573
Smpd4	1.00909	0.881398	1.10951	0.791647	1.06781	0.598196
Smpd5	1.06265	1.21228	0.725075	1.0412	1.21111	1.32527
Enpp7	0.906254	1.46128	0.632464	1.0107	1.87049	1.27004
Smpdl3b	1.23448	0.766272	0.99925	0.143572	0.153017	0.315989
