# Supplementary material for: SIRT1 regulates sphingolipid metabolism and neural differentiation of mouse embryonic stem cells through c-Myc-SMPDL3B
Source: eLife. 2021 May 27;10:e67452. doi: 10.7554/eLife.67452 (PMC8216717; doi:10.7554/eLife.67452)
Supplement: Figure 3—figure supplement 1—source data 1. [file elife-67452-fig3-figsupp1-data1.xlsx]

## Sheet: Figure 3 FS 1B
Relative BODIPY FL C5-Sphingomyelin Intensity in WT and SIRT1 KO mESCs with or without overexpression of SMPDL3B cultured in ESGRO medium
	WT-V	WT-L3B	KO-V	KO-L3B
replicate 1	1.02294	0.701096	1.1978	0.426826
replicate 2	1.00055	0.689778	1.19846	0.421904
replicate 3	0.976515	0.676983	1.18657	0.422561

## Sheet: Figure 3 FS 1C
Relative endogenous sphingomyelin levels in WT and SIRT1 KO mESCs with or without overexpression of SMPDL3B cultured in ESGRO medium
	WT-V	WT-L3B	KO-V	KO-L3B
replicate 1	1.25957	0.198527	1.36529	0.309822
replicate 2	0.647561	0.263208	1.33712	0.246063
replicate 3	1.09286	0.14944	1.67675	0.248411
