# Supplementary material for: SIRT1 regulates sphingolipid metabolism and neural differentiation of mouse embryonic stem cells through c-Myc-SMPDL3B
Source: eLife. 2021 May 27;10:e67452. doi: 10.7554/eLife.67452 (PMC8216717; doi:10.7554/eLife.67452)
Supplement: Figure 3—source data 1. [file elife-67452-fig3-data1.xlsx]

## Sheet: Figure 3C
Relative BODIPY FL C5-Sphingomyelin Intensity in WT and SIRT1 KO mESCs with or without overexpression of SMPDL3B
	WT-V	WT-L3B	KO-V	KO-L3B
replicate 1	1.02039	1.05745	1.53021	1.08448
replicate 2	0.995231	1.05849	1.53941	1.09056
replicate 3	0.984377	1.05559	1.53914	1.08091

## Sheet: Figure 3E
Relative BODIPY FL C5-Sphingomyelin Intensity in WT and SIRT1 KO mESCs with or without overexpression of WT SMPDL3B or H135A SMPDL3B
	WT-V	WT-L3B WT	WT-L3B H135A	KO-V	KO-L3B WT	KO-L3B H135A
replicate 1	1.00265	0.934561	1.02021	1.43926	1.14174	1.57641
replicate 2	0.997871	0.925694	1.01857	1.44071	1.13984	1.56631
replicate 3	0.999475	0.926904	0.990699	1.44486	1.13321	1.48348

## Sheet: Figure 3F
Relative endogenous sphingomyelin levels in WT and SIRT1 KO mESCs with or without overexpression of WT SMPDL3B or H135A SMPDL3B
	WT-V	WT-L3B WT	WT-L3B H135A	KO-V	KO-L3B WT	KO-L3B H135A
replicate 1	0.661369	0.228974	0.814938	1.5195	0.374567	1.46079
replicate 2	1.07914	0.232777	0.847138	1.61588	0.415556	1.92784
replicate 3	1.25949	0.226703	0.825795	1.57149	0.373829	1.6548

## Sheet: Figure 3I
Relative BODIPY FL C5-Sphingomyelin Intensity in WT and SIRT1 KO mESCs with or without stable knockdown of SMPDL3B
	WT-V	WT-shL3B	KO-V	KO-shL3B
replicate 1	1	1.35157	2.03428	2.10873
replicate 2	1	1.46277	2.03428	1.61634
replicate 3	1	1.39627	2.03428	1.97203

## Sheet: Figure 3J
Relative endogenous sphingomyelin levels in WT and SIRT1 KO mESCs with or without stable knockdown of SMPDL3B
	WT-V	WT-shL3B	KO-V	KO-shL3B
replicate 1	0.878601	2.9601	2.07518	2.99399
replicate 2	0.763057	2.56324	3.51656	2.66739
replicate 3	1.35834	2.3531	1.81759	1.64381
