# Supplementary material for: SIRT1 regulates sphingolipid metabolism and neural differentiation of mouse embryonic stem cells through c-Myc-SMPDL3B
Source: eLife. 2021 May 27;10:e67452. doi: 10.7554/eLife.67452 (PMC8216717; doi:10.7554/eLife.67452)
Supplement: Figure 4—source data 1. [file elife-67452-fig4-data1.xlsx]

## Sheet: Figure 4C
Relative mRNA abundance of Smpdl3b in WT and SIRT1 KO mESCs with or without overexpression of WT or H335Y mutant SIRT1
	WT-V	WT-SIRT1 WT	WT-SIRT1 HY	KO-V	KO-SIRT1 WT	KO-SIRT1 HY
replicate 1	1.02078	0.804295	0.525667	0.178988	0.379311	0.205482
replicate 2	0.933887	0.791721	0.398535	0.1782	0.423915	0.202211
replicate 3	1.04533	0.761396	0.521015	0.177033	0.411292	0.150908

## Sheet: Figure 4F
Relative BODIPY FL C5-Sphingomyelin Intensity in WT and SIRT1 KO mESCs with or without overexpression of WT SMPDL3B or H135A SMPDL3B
	WT-V	WT-SIRT1 WT	WT-SIRT1 HY	KO-V	KO-SIRT1 WT	KO-SIRT1 HY
replicate 1	1.01794	0.791545	0.953605	1.29981	0.965438	1.1005
replicate 2	1.00023	0.783394	0.940896	1.30349	0.917232	1.10252
replicate 3	0.981828	0.774366	0.930642	1.2871	0.910833	1.04958
