# Supplementary material for: SIRT1 regulates sphingolipid metabolism and neural differentiation of mouse embryonic stem cells through c-Myc-SMPDL3B
Source: eLife. 2021 May 27;10:e67452. doi: 10.7554/eLife.67452 (PMC8216717; doi:10.7554/eLife.67452)
Supplement: Figure 5—figure supplement 1—source data 1. [file elife-67452-fig5-figsupp1-data1.xlsx]

## Sheet: Figure 5 FS 1B
Relative mRNA abundance of Smpdl3b in WT and SIRT1 KO mESCs and MEFs analyzed using different qPCR primers
		WT			KO
	Primer sets	replicate 1	replicate 2	replicate 3	replicate 1	replicate 2	replicate 3
mESCs	Smpdl3b_1	1.23735	0.781181	0.981466	0.313803	0.303897	0.19228
	Smpdl3b_2	1.07862	0.905662	1.01571	0.33448	0.18611	0.207769
	Smpdl3b_3	0.873379	1.03065	1.09597	0.2276	0.21758	0.163069
	Smpdl3b_4	0.874537	1.08322	1.04225	0.196583	0.219436	0.224736
MEFs	Smpdl3b_1	1.07464	0.88385	1.04151	1.04622	1.1754	0.93438
	Smpdl3b_2	0.978509	1.01862	1.00287	1.02468	0.994288	0.787062
	Smpdl3b_3	1.0438	0.988737	0.967464	1.08174	1.25254	1.11639
	Smpdl3b_4	0.935043	1.02935	1.03561	1.13898	0.939482	0.930833

## Sheet: Figure 5 FS 1C
Relative endogenous sphingomyelin levels in WT and SIRT1 KO mESCs with or without overexpression of SMPDL3B cultured in ESGRO medium
	WT			KO
	replicate 1	replicate 2	replicate 3	replicate 1	replicate 2	replicate 3
Nuclear	0.940879	1.06851	0.990615	0.856203	0.412802	0.489125
Cytosol	2.68651	3.00715	2.99221	1.29438	1.48927	1.38887
