# Supplementary material for: SIRT1 regulates sphingolipid metabolism and neural differentiation of mouse embryonic stem cells through c-Myc-SMPDL3B
Source: eLife. 2021 May 27;10:e67452. doi: 10.7554/eLife.67452 (PMC8216717; doi:10.7554/eLife.67452)
Supplement: Figure 5—figure supplement 2—source data 1. [file elife-67452-fig5-figsupp2-data1.xlsx]

## Sheet: Figure 5 FS 2D
Relative mRNA abundance of Smpdl3b in WT and SIRT1 KO mESCs treated with different doses of EPZ 6438
	WT							KO
EPZ 6438 (uM)	0	0.1	0.3	0.5	0.7	0.9	1.1	0	0.1	0.3	0.5	0.7	0.9	1.1
replicate 1	0.901887	1.38598	1.48381	1.13351	0.962751	0.968821	0.669961	0.374495	0.404817	0.443189	0.423919	0.374944	0.387797	0.330206
replicate 2	0.976563	1.16296	1.23427	1.41251	1.01334	1.00495	0.852373	0.419332	0.416907	0.484905	0.329359	0.372482	0.417164	0.363424
replicate 3	1.12155	1.24682	1.54474	1.15603	1.03426	0.982176	0.874064	0.411162	0.432509	0.516235	0.455307	0.328146	0.39358	0.358115

## Sheet: Figure 5 FS 2E
Relative mRNA abundance of Ezh2 in WT and SIRT1 KO mESCs with or without transfection of siEzh2
	WT			KO
	replicate 1	replicate 2	replicate 3	replicate 1	replicate 2	replicate 3
siNeg	0.835234	1.02804	1.13672	0.784588	0.862085	0.666047
siEzh2	0.127219	0.139536	0.162518	0.0491215	0.0653805	0.0655361

## Sheet: Figure 5 FS 2G
Relative mRNA abundance of Smpld3b in WT and SIRT1 KO mESCs with or without transfection of siEzh2
	WT			KO
	replicate 1	replicate 2	replicate 3	replicate 1	replicate 2	replicate 3
siNeg	0.98024	0.957352	1.06241	0.404807	0.331259	0.367297
siEzh2	0.989318	0.943223	0.915349	0.393107	0.361887	0.390419
