# Supplementary material for: SIRT1 regulates sphingolipid metabolism and neural differentiation of mouse embryonic stem cells through c-Myc-SMPDL3B
Source: eLife. 2021 May 27;10:e67452. doi: 10.7554/eLife.67452 (PMC8216717; doi:10.7554/eLife.67452)
Supplement: Figure 5—source data 1. [file elife-67452-fig5-data1.xlsx]

## Sheet: Figure 5A
The association of indicated genes/chromatin marks near the TSS of Smpdl3b gene (ChIP-qPCR)
% of Input
			TSS-566 -385	TSS-392 -206	TSS -30- +139'	Exon1	TSS +218- +373	TSS +336- +516	TSS +495- +649
Pol II	WT	replicate 1	0.706246	1.25338	2.35135	1.46265	1.35029	1.23513	1.08448
		replicate 2	0.659752	1.31474	1.9895	1.33436	1.49931	1.33091	1.18573
		replicate 3	1.05712	1.35756	2.5144	1.63648	1.32197	1.0426	1.06451
		replicate 4	0.996949	1.42958	2.09358	1.50752	1.42994	1.14415	1.16382
	KO	replicate 1	0.0309196	0.0115461	0.0589173	0.0263639	0.000614813	0.0249895	0.0396496
		replicate 2	0.0135603	0.0173731	0.0479577	0.0140771	0.000330981	0.0406811	0.042201
		replicate 3	0.0347689	0.0190878	0.0537405	0.0311212	0.0424123	0.0283882	0.0339497
		replicate 4	0.0152505	0.0276301	0.0424443	0.0166983	0.03206	0.0444492	0.0361458
H3K4me3	WT	replicate 1	0.0893864	0.0718733	0.666285	0.23222	0.423182	0.402448	0.180341
		replicate 2	0.100352	0.111682	0.687837	0.264945	0.493454	0.392925	0.199892
		replicate 3	0.148442	0.062195	0.657016	0.255755	0.429317	0.287169	0.228815
		replicate 4	0.162466	0.100851	0.675815	0.288991	0.492684	0.278774	0.255325
	KO	replicate 1	0.0559474	0.0947672	0.560734	0.155293	0.227955	0.189492	0.104704
		replicate 2	0.030173	0.0925342	0.491428	0.19092	0.24123	0.193098	0.0999103
		replicate 3	0.0503779	0.0467845	0.538283	0.1389	0.164103	0.194296	0.0964383
		replicate 4	0.0273336	0.0454812	0.471184	0.172179	0.173828	0.197611	0.0918101
H3K27me3	WT	replicate 1	0.0496431	0.0283468	0.00834625	0.00867429	0.0148682	0.0146343	0.0213223
		replicate 2	0.0491993	0.0284547	0.00821	0.0052255	0.0255421	0.0138455	0.0146956
		replicate 3	0.0428239	0.015699	0.0114862	0.00839825	0.0109648	0.0116666	0.0271204
		replicate 4	0.0424201	0.0157659	0.0113132	0.00501629	0.0190899	0.0109954	0.0190278
	KO	replicate 1	0.112982	0.0381149	0.0299671	0.0269901	0.0533708	0.0896659	0.0513417
		replicate 2	0.100138	0.0485915	0.0460784	0.0260964	0.0396696	0.0790789	0.047428
		replicate 3	0.0636826	0.0458237	0.0382528	0.0336474	0.055237	0.0724538	0.0673057
		replicate 4	0.055039	0.0575174	0.0568006	0.0325959	0.0416256	0.0634287	0.0624703
c-Myc	WT	replicate 1	0.0306241	0.0350519	0.0697569	0.0438347	0.0423378	0.0714486	0.053202
		replicate 2	0.0239415	0.0643742	0.0825945	0.0456154	0.0442526	0.0546183	0.0574801
		replicate 3	0.0509954	0.0392728	0.0786214	0.0423107	0.0453462	0.0849123	0.0430237
		replicate 4	0.040933	0.0706585	0.0930732	0.0440398	0.0472991	0.0663309	0.0466733
	KO	replicate 1	0.0286245	0.041669	0.0750407	0.0205376	0.0323872	0.0509245	0.0299088
		replicate 2	0.0321297	0.0415966	0.076658	0.0301547	0.0342338	0.0488478	0.0330165
		replicate 3	0.0169409	0.0393318	0.0627394	0.0290511	0.0282014	0.0599868	0.0363952
		replicate 4	0.0193898	0.0392645	0.0640545	0.0411869	0.0298451	0.0576782	0.0400416
EZH2	WT	replicate 1	0.0579142	0.037547	0.0396951	0.0225949	0.0442178	0.024363	0.027963
		replicate 2	0.0213222	0.0155604	0.046672	0.0212009	0.0359562	0.0395845	0.0210089
		replicate 3	0.0503854	0.0215068	0.0483589	0.0222308	0.033499	0.0201213	0.0351081
		replicate 4	0.0175554	0.00801979	0.0561433	0.0208369	0.0271012	0.0338123	0.0267407
	KO	replicate 1	0.0497696	0.0233354	0.0601155	0.0335645	0.0564915	0.0707378	0.0338867
		replicate 2	0.0312907	0.0226052	0.0530664	0.0418199	0.0553473	0.0590298	0.0210776
		replicate 3	0.02364	0.0289508	0.0725221	0.0413256	0.0583129	0.0563676	0.0455397
		replicate 4	0.0134903	0.0281021	0.0646694	0.0508471	0.0571861	0.0465402	0.0291407

## Sheet: Figure 5B
Association scores of potential transcription factors (TFs) near the TSS of Smpdl3b gene
	TFs	Association scores
	Nanog	0.13
	Oct4	0
	Sox2	0
	Smad1	0
	STAT3	0.4
	c-Myc	0.52
	n-Myc	0.97
	Klf4	0
	Esrrb	0.89
	Tcfcp2l1	0.9
	Zfx	0.13
	E2f1	0.96
	Suz12	0
	CTCF	0.29

## Sheet: Figure 5C
Relative mRNA abundance of Smpdl3b in WT and SIRT1 KO dCas9 mESCs transfected with different sgRNAs
	WT			KO
	replicate 1	replicate 2	replicate 3	replicate 1	replicate 2	replicate 3
Gal4	0.945372	0.9715	1.08313	0.601116	0.509252	0.615361
-327	1.179	0.936588	0.884413	0.516551	0.463647	0.510623
-426	0.967426	0.931224	1.10135	0.650962	0.74232	0.620686
517	0.896509	0.973511	1.12998	0.783084	0.63329	0.739381
528	0.965384	0.850551	1.18406	0.881821	0.782885	0.860473

## Sheet: Figure 5D
Relative mRNA abundance of Smpdl3b in WT and SIRT1 KO mESCs treated with DMSO or 10 mM 10058-F4
	WT			KO
	replicate 1	replicate 2	replicate 3	replicate 1	replicate 2	replicate 3
DMSO	1.14627	0.798747	1.05498	0.467529	0.466106	0.279782
10058-F4	0.54854	0.555959	0.54122	0.354258	0.332356	0.377603

## Sheet: Figure 5E
Relative mRNA abundance of c-Myc and Smpdl3b in WT and SIRT1 KO mESCs transfected with siNegative or siMyc
c-Myc mRNA
	WT			KO
	replicate 1	replicate 2	replicate 3	replicate 1	replicate 2	replicate 3
siNeg	0.952063	0.968148	1.07979	0.736107	1.01976	0.830976
siMyc	0.244141	0.230147	0.266834	0.195725	0.261731	0.210967
Smpdl3b mRNA
	WT			KO
	replicate 1	replicate 2	replicate 3	replicate 1	replicate 2	replicate 3
siNeg	0.910667	1.01988	1.06945	0.235787	0.202324	0.24909
siMyc	0.541346	0.528265	0.595562	0.155249	0.139377	0.158257

## Sheet: Figure 5F
Relative mRNA abundance of Smpdl3b in WT and SIRT1 KO mESCs transfected with WT or K323 mutant c-Myc
	WT-V	KO-V	KO-c-Myc WT	KO-c-Myc-KR	KO-c-Myc-KQ
replicate 1	0.971831	0.204716	0.323567	0.52989	0.219221
replicate 2	0.921763	0.214294	0.283977	0.484107	0.207241
replicate 3	1.10641	0.270949	0.375879	0.517049	0.234263
replicate 4	1.05268	0.333448	0.221031	0.712937	0.318993
replicate 5	1.03676	0.238573	0.253757	0.933324	0.331085
replicate 6	0.910561	0.33766	0.240337	1.11374	0.298022

## Sheet: Figure 5G
Relative luciferase activity of luciferase reporters containing the basic vector (pGL3-basic), the WT promoter of Smpdl3b gene, or a promoter of Smpdl3b gene with a mutant E-box in WT and SIRT1 KO mESCs
	WT			KO
	replicate 1	replicate 2	replicate 3	replicate 1	replicate 2	replicate 3
pGL3-basic	0.943513	1.02973	1.02676	1.28682	1.27622	1.2898
pGL3-Smpdl3b WT	3.44354	3.29802	3.34927	1.26642	1.27293	1.40635
pGL3-Smpdl3b E-box mut	0.152165	0.139716	0.154231	0.257352	0.264965	0.259528
