# Supplementary material for: SIRT1 regulates sphingolipid metabolism and neural differentiation of mouse embryonic stem cells through c-Myc-SMPDL3B
Source: eLife. 2021 May 27;10:e67452. doi: 10.7554/eLife.67452 (PMC8216717; doi:10.7554/eLife.67452)
Supplement: Figure 6—source data 1. [file elife-67452-fig6-data1.xlsx]

## Sheet: Figure 6A
Relative ordered fraction in WT and SIRT1 KO mESCs treated with or without MβCD
	Sirt1 WT	Sirt1 KO	Sirt1 WT+MβCD	Sirt1 KO+MβCD
	1.04167	0.975877	0.866228	1.01974
	1.00877	1.01974	0.723684	0.285088
	0.997807	0.986842	0.953947	0.899123
	0.964912	1.05263	0.789474	0.975877
	1.05263	0.964912	0.690789	0.942982
	0.953947	1.01974	0.953947	1.04167
	1.08553	0.833333	0.888158	0.822368
	1.05263	1.04167	0.822368	0.910088
	0.964912	0.997807	0.833333	0.910088
	0.975877	0.921053	0.844298	-0.0109649
	0.986842	0.822368	0.877193	1.0307
	0.975877	0.701754	0.888158	0.504386
	0.789474	0.712719	0.844298	0.964912
	1.0307	0.866228	1.0307	0.975877
	0.997807	0.767544	0.910088	0.811404
	1.08553	0.932018	0.899123	0.953947
	0.975877	0.910088	0.953947	0.0877193
	0.986842	0.964912	0.975877	0.109649
	1.04167	0.986842	0.986842	-0.0657895
	0.975877	0.910088	1.0307	0.274123
	1.01974	1.07456	0.0219298	0.230263
	1.01974	0.855263	0.64693	0.756579
	1.01974	0.723684	0.910088	0.307018
	0.997807	0.986842	0.921053	-0.0767544
	1.01974	0.921053	0.866228	-0.296053
	1.01974	0.877193	1.0636	-0.197368
	1.01974	0.888158	0.866228	0.635965
	0.997807	0.66886	0.997807	0.756579
	0.986842	0.778509	0.679825	0.701754
	0.953947	0.712719	0.789474	0.800439
