# Supplementary material for: SIRT1 regulates sphingolipid metabolism and neural differentiation of mouse embryonic stem cells through c-Myc-SMPDL3B
Source: eLife. 2021 May 27;10:e67452. doi: 10.7554/eLife.67452 (PMC8216717; doi:10.7554/eLife.67452)
Supplement: Figure 7—source data 1. [file elife-67452-fig7-data1.xlsx]

## Sheet: Figure 7B
Relative expression of indicated genes during 4-week neural differentiation of E14 WT and SIRT1 KO mESCs
		WT				KO
Gene		Week 1	Week 2	Week 3	Week 4	Week 1	Week 2	Week 3	Week 4
Sirt1	replicate 1	0.93484	0.756699	0.961122	0.462585	0.00886779	0.0335578	0.0109175	0.0248225
	replicate 2	0.961122	0.670259	0.842525	0.472305	0.00720289	0.0354712	0.0109175	0.0363422
	replicate 3	1.10404	0.854286	1.00194	0.456217	0.0116203	0.0458413	0.012716	0.0175521
Smpdl3b	replicate 1	0.866314	0.271692	0.311636	0.075868	0.706163	0.290413	0.107307	0.0569223
	replicate 2	0.952576	0.513006	0.386634	0.042691	1.0513	0.301558	0.0990828	0.0433628
	replicate 3	1.18111	0.541759	0.353955	0.0514678	0.794284	0.283098	0.116089	0.0581945
Nanog	replicate 1	0.896063	0.481697	0.60894	0.0999046	0.836883	0.567498	0.706103	0.270883
	replicate 2	1.11435	0.482828	0.559236	0.0913837	0.749811	0.55624	0.594571	0.42579
	replicate 3	0.989589	0.579036	0.570437	0.1252	0.77336	0.543775	0.647942	0.320849
Oct4	replicate 1	1.06616	0.718227	0.779147	0.0454549	0.911455	0.58955	0.395379	0.223857
	replicate 2	0.902002	0.758384	0.758938	0.0499238	0.872878	0.722581	0.74559	0.196119
	replicate 3	1.03184	0.681839	0.700446	0.0377662	0.876165	0.640429	0.585617	0.177362
Sox3	replicate 1	0.974518	3.30068	7.43442	47.1504	0.217746	9.15313	2.33567	13.6155
	replicate 2	1.28835	4.53003	7.62458	43.4075	0.365908	14.0837	5.073	11.5939
	replicate 3	0.737136	6.21727	4.42014	53.3315	0.304864	23.0137	9.21834	20.0463
Nestin	replicate 1	1.17143	0.744129	2.67458	32.4841	1.28776	1.0018	2.70707	9.90678
	replicate 2	0.822199	1.32222	1.6726	28.3646	1.04369	1.12992	1.7282	6.22911
	replicate 3	1.00637	1.65505	2.8267	30.3545	1.35511	1.27443	6.6415	7.97589
Notch3	replicate 1	0.993535	86.8178	33.2505	318.279	2.75087	88.1074	36.4007	207.259
	replicate 2	0.984499	78.2858	29.3461	290.813	2.4553	83.702	34.8475	185.057
	replicate 3	1.02197	108.393	32.2674	352.735	1.98693	87.134	40.0676	177.942
Tau	replicate 1	1.01709	2.38274	6.97833	28.644	0.349604	3.14024	7.26975	11.7058
	replicate 2	1.07761	3.15129	3.16292	43.6285	0.627856	2.50768	9.62118	12.3048
	replicate 3	0.905296	3.56248	4.52321	23.3772	0.575591	4.61369	4.87708	7.82149
