# Supplementary material for: SIRT1 regulates sphingolipid metabolism and neural differentiation of mouse embryonic stem cells through c-Myc-SMPDL3B
Source: eLife. 2021 May 27;10:e67452. doi: 10.7554/eLife.67452 (PMC8216717; doi:10.7554/eLife.67452)
Supplement: Figure 8—source data 1. [file elife-67452-fig8-data1.xlsx]

## Sheet: Figure 8C
The fraction of differentiated cells positive of indicated neural markers in in WT and SIRT1 KO mESCs with or without overexpression of WT SMPDL3B after 4 weeks of neural differentiation
		WT-V	WT-L3B	KO-V	KO-L3B
GABA+ cells (% total live cells)	replicate 1	73.35	87	66.7	92.1
(% total live cells)	replicate 2	71.5	85.5	67.4	91.6
	replicate 3	75.2	86.6	62.8	91.8
TUBB+ cells	replicate 1	94.8	74.9	62.3	78.9
(% total live cells)	replicate 2	95.2	73.7	63	79
	replicate 3	95	74.8	62.6	78.2
CNPase+ cells	replicate 1	50	32.6	41	47.4
(% total live cells)	replicate 2	50	33.3	42	48.2
	replicate 3	50.7	32.8	40.6	47.5
TUBB+CNPase+ cells	replicate 1	84.4	46.1	45.3	60.5
(% total live TUBB+ or CNPase+ cells)	replicate 2	84.6	44.6	50.6	61.9
	replicate 3	84.8	45.8	47.6	61.5

## Sheet: Figure 8E
Relative mRNA abundance of Sox2 and Sox3 in WT and SIRT1 KO mESCs with or without overexpression of WT SMPDL3B after 4 weeks of neural differentiation
		WT-V	WT-L3B	KO-V	KO-L3B
Sox2	replicate 1	0.887392	0.998589	0.476899	0.855477
	replicate 2	1.11843	1.38217	0.622933	0.930023
	replicate 3	0.994174	1.2121	0.517218	0.676863
Sox3	replicate 1	1.2683	0.645241	0.6252	1.13253
	replicate 2	0.810538	0.767689	0.529206	1.38146
	replicate 3	0.921161	1.00937	0.657444	1.28394
