# Supplementary material for: SIRT1 regulates sphingolipid metabolism and neural differentiation of mouse embryonic stem cells through c-Myc-SMPDL3B
Source: eLife. 2021 May 27;10:e67452. doi: 10.7554/eLife.67452 (PMC8216717; doi:10.7554/eLife.67452)
Supplement: Figure 9—source data 1. [file elife-67452-fig9-data1.xlsx]

## Sheet: Figure 9A
Body weights of E14.5 and E18.5 embryos from chow or HFD fed dams from Sirt1 +/- x Sirt1 +/- breeding pairs
	WT-Chow	KO-Chow	WT-HFD	KO-HFD			WT-Chow	KO-Chow	WT-HFD	KO-HFD
E14.5 (g)	0.19	0.21	0.231	0.18		E18.5 (g)	1.3	0.9	0.5	0.6
	0.24	0.24	0.23	0.18			1.3	1.2	1.2	0.5
	0.24	0.22	0.258	0.17			1.2	0.9	1.1	0.5
	0.27	0.23	0.245	0.2			1.3	0.9	0.9	0.9
	0.25	0.21	0.25	0.16			1.3	0.9	1.2	1
	0.25	0.17	0.23	0.23			1.2	1	1.1	1
	0.26	0.23	0.24	0.17			1.5	1.1	1.1	0.8
	0.21	0.18	0.24	0.2			1.5	1.1		0.5
	0.28	0.16	0.25	0.21				1.1
	0.24	0.16	0.23	0.19				1.3
	0.27		0.24	0.19				1.3
	0.21		0.19	0.15				1.4
								1.2
								1
								1.3
								1.1

## Sheet: Figure 9B
Relative mRNA abundance of Smpdl3b in the brains of E18.5 embryos from chow or HFD fed dams from Sirt1 +/- x Sirt1 +/- breeding pairs
		WT-Chow	KO-Chow	WT-HFD	KO-HFD
Smpdl3b	embryo 1	1.01872	0.820712	0.664714	0.564401
	embryo 2	0.968894	0.886873	0.996273	0.656132
	embryo 3	0.914395	0.839447	0.884133	0.640709
	embryo 4	1.06126	0.849885	0.764939	0.770179
	embryo 5	1.09916	0.838095	0.594756	0.4097
	embryo 6	0.937577	0.659063	0.784617	0.500948

## Sheet: Figure 9C
The endogenous sphingomyelin contents in the brains of E18.5 embryos from chow or HFD fed dams from Sirt1 +/- x Sirt1 +/- breeding pairs
Sphingomyelin (ug/mg tissue)
Tissue		WT-Chow	KO-Chow	WT-HFD	KO-HFD
Cerebrum	embryo 1	0.293934	0.184989	0.169206	0.450908
	embryo 2	0.291917	0.348998	0.276714	0.289877
	embryo 3	0.206593	0.187037	0.263683	0.256834
	embryo 4	0.212799	0.162836	0.226606	0.365273
	embryo 5	0.188908	0.085951	0.121734	0.221463
	embryo 6	0.210161	0.140496	0.124992	0.398317
Cerebellum	embryo 1	0.251249	0.127809	0.214947	0.339525
	embryo 2	0.182834	0.103795	0.185859	0.192573
	embryo 3	0.152583	0.231409	0.213318	0.488919
	embryo 4	0.170501	0.242858	0.220067	0.28228
	embryo 5	0.165847	0.240065	0.149092	0.51091
	embryo 6	0.115816	0.203484	0.11698	0.279836
Brain stem	embryo 1	0.120642	0.180922	0.0991796	0.207249
	embryo 2	0.0989827	0.164854	0.169277	0.136365
	embryo 3	0.175184	0.181867	0.157856	0.188051
	embryo 4	0.134228	0.128231	0.133441	0.232059
	embryo 5	0.161007	0.109092	0.12714	0.363196
	embryo 6	0.0792925	0.158711	0.197631	0.208726

## Sheet: Figure 9D
Relative mRNA abundance of indicated neural markers in the brains of E18.5 embryos from chow or HFD fed dams from Sirt1 +/- x Sirt1 +/- breeding pairs
		WT-Chow	KO-Chow	WT-HFD	KO-HFD
Mash1	embryo 1	0.822063	1.62291	14.2062	5.89981
	embryo 2	0.792386	1.51092	16.1492	5.5484
	embryo 3	1.04261	1.08789	13.2036	5.25953
	embryo 4	1.3663	1.16379	10.4711	2.12896
	embryo 5	0.975934	0.839729	10.3498	5.28496
	embryo 6	1.00071	1.08827	11.6289	3.82082
Tau	embryo 1	0.596545	0.748816	7.56355	4.33082
	embryo 2	0.98918	0.830464	8.16202	3.39835
	embryo 3	0.895745	1.01274	6.54559	3.83621
	embryo 4	1.39957	0.774999	6.41236	1.93286
	embryo 5	1.00593	0.885727	6.92033	3.33188
	embryo 6	1.11303	0.873666	7.38098	3.47573
Map2	embryo 1	0.756461	0.871694	2.33754	1.41972
	embryo 2	0.911338	0.913016	2.19314	1.38612
	embryo 3	0.943346	1.03618	2.06547	1.33261
	embryo 4	1.42026	1.00658	1.88117	0.994817
	embryo 5	1.03357	0.986627	2.34785	1.54562
	embryo 6	0.935032	0.916309	1.90857	1.5274
NeuN	embryo 1	0.712099	0.907803	3.1297	2.34123
	embryo 2	0.951707	0.974666	2.93074	1.7541
	embryo 3	0.913921	0.978181	2.57437	2.04009
	embryo 4	1.28775	0.831478	2.65359	1.32292
	embryo 5	1.05424	0.978307	2.72604	1.90749
	embryo 6	1.08028	0.937278	2.72552	1.92852
