# Supplementary material for: SIRT1 regulates sphingolipid metabolism and neural differentiation of mouse embryonic stem cells through c-Myc-SMPDL3B
Source: eLife journal article supplement (doi:10.7554/elife.67452), 2021-05-27
Supplement: supp [file elife_poa_e67452_Figure_1_figure_supplement_1.pdf › elife_poa_e67452_Figure_1_figure_supplement_1.pdf]

**A**

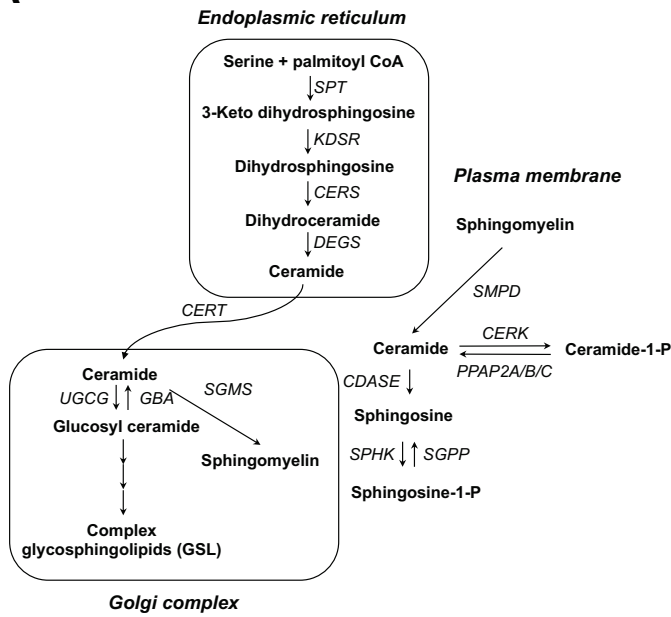

**B**

## Methionine Restricted Medium

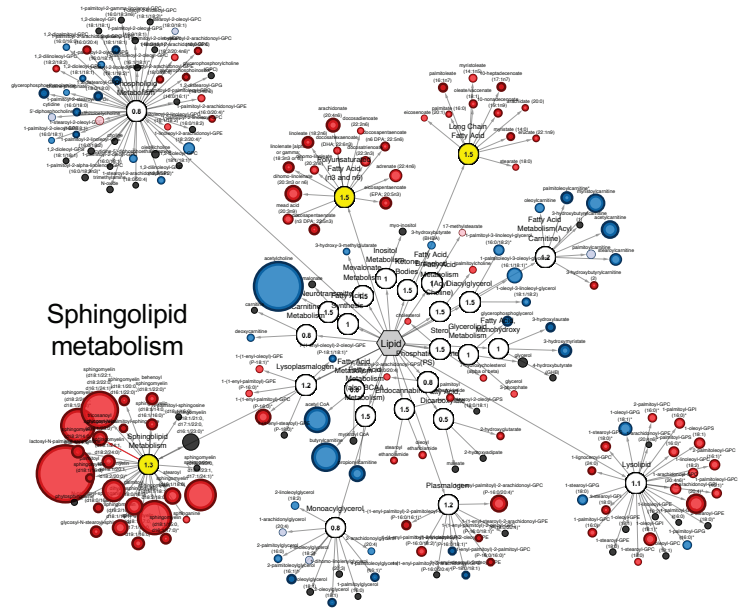

**C**

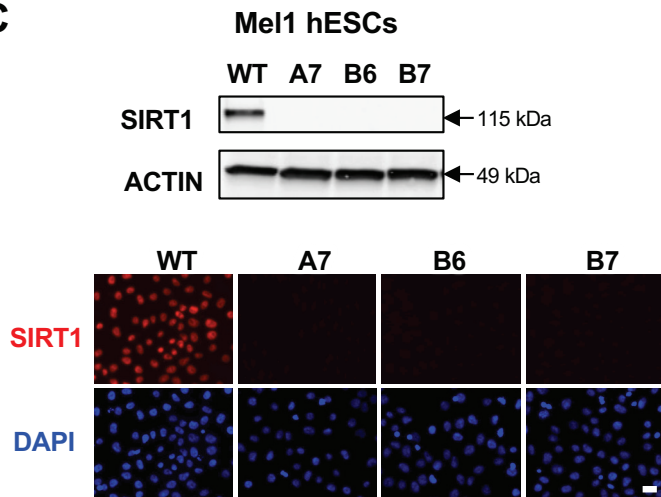

**D**

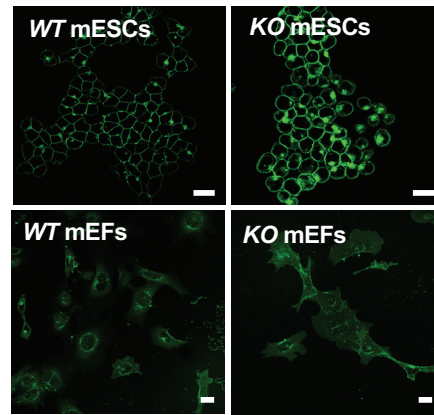

BODIPY FL C<sub>5</sub>-Sphingomyelin

**E**

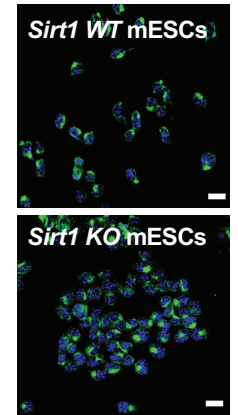

BODIPY FL C<sub>5</sub>-Ceramide  
DAPI
