# Supplementary material for: SIRT1 regulates sphingolipid metabolism and neural differentiation of mouse embryonic stem cells through c-Myc-SMPDL3B
Source: eLife journal article supplement (doi:10.7554/elife.67452), 2021-05-27

Figure 5 figure supplement 2B

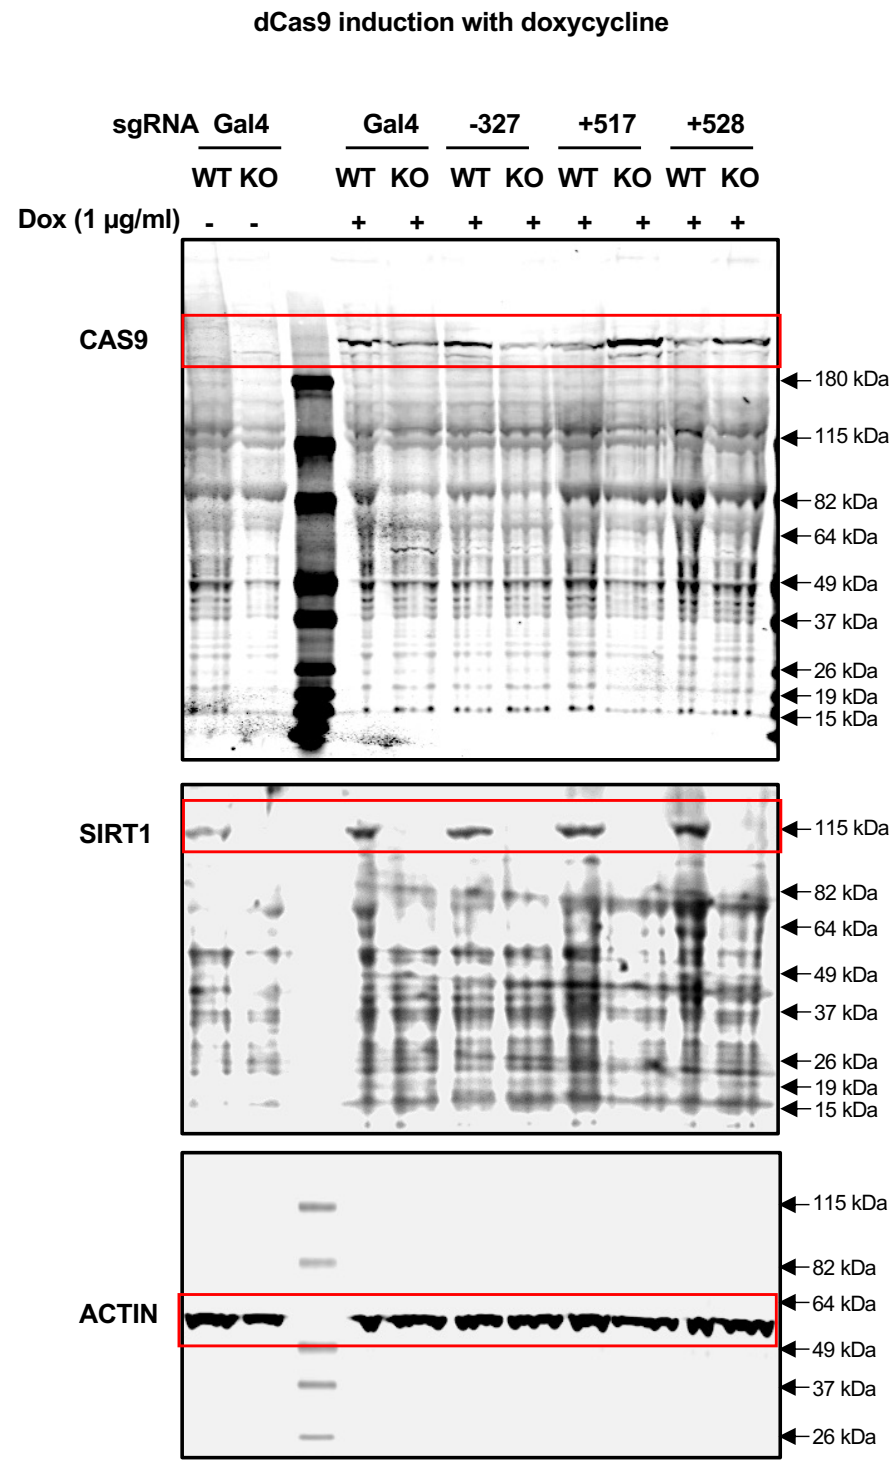

Figure 5 figure supplement 2F

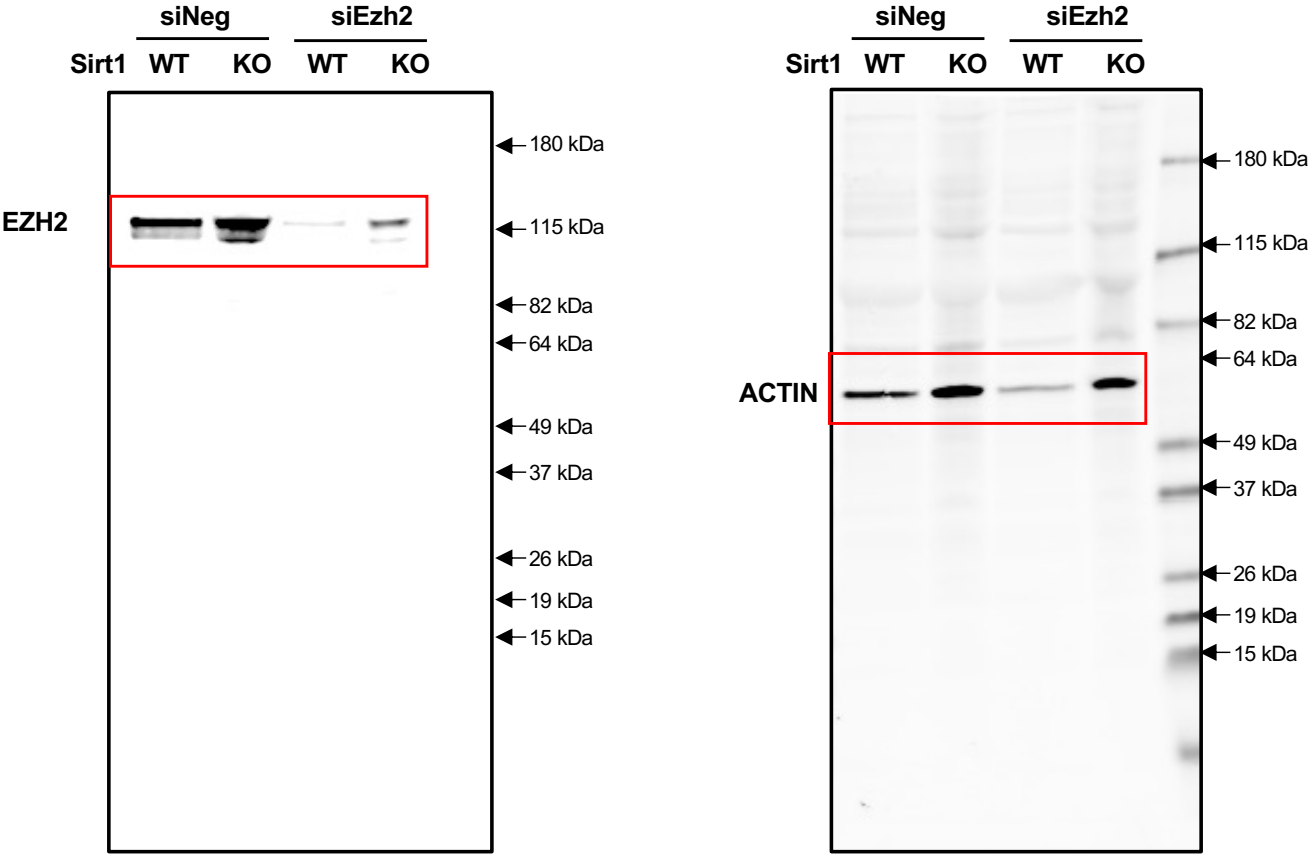

Supplement: supp [file elife_poa_e67452_Figure_5_figure_supplement_2_source_data_2.pdf › elife_poa_e67452_Figure_5_figure_supplement_2_source_data_2.pdf]
