# Supplementary material for: SIRT1 regulates sphingolipid metabolism and neural differentiation of mouse embryonic stem cells through c-Myc-SMPDL3B
Source: eLife. 2021 May 27;10:e67452. doi: 10.7554/eLife.67452 (PMC8216717; doi:10.7554/eLife.67452)
Supplement: Supplementary file 1. [file elife-67452-supp1.xlsx]

## Sheet: Sheet1
Table S1. Lipid profiles of WT and SIRT1 KO mESCs cultured in complete M10 medium or a methionine rescricted M10 medium containing 6 uM methionine (MR) for 6 hours
Sub Pathway	Biochemical Name	Platform	Comp ID	KEGG	HMDB	PubChem	SIRT1KO/WT		Mean Values
							Complete	MR	WT Complete	WT MR	SIRT1 KO Complete	SIRT1 KO MR
Long Chain Fatty Acid	myristate (14:0)	LC/MS neg	1365	C06424	HMDB00806	11005	1	1.47	1.012	0.7479	1.0163	1.0986
Long Chain Fatty Acid	myristoleate (14:1n5)	LC/MS neg	32418	C08322	HMDB02000	5281119	1.11	1.44	0.9688	0.7611	1.0796	1.0994
Long Chain Fatty Acid	palmitate (16:0)	LC/MS neg	1336	C00249	HMDB00220	985	0.88	1.18	1.0254	0.9781	0.9071	1.1585
Long Chain Fatty Acid	palmitoleate (16:1n7)	LC/MS neg	33447	C08362	HMDB03229	445638	1.02	1.67	0.9891	0.6395	1.0074	1.0652
Long Chain Fatty Acid	10-heptadecenoate (17:1n7)	LC/MS neg	33971		HMDB60038	5312435	1	1.63	0.9903	0.7772	0.9916	1.2633
Long Chain Fatty Acid	stearate (18:0)	LC/MS neg	1358	C01530	HMDB00827	5281	0.92	1.17	0.9659	0.9921	0.8919	1.163
Long Chain Fatty Acid	10-nonadecenoate (19:1n9)	LC/MS neg	33972		HMDB13622	5312513	1.2	1.51	0.8915	0.9586	1.073	1.4514
Long Chain Fatty Acid	arachidate (20:0)	LC/MS neg	1118	C06425	HMDB02212	10467	1.04	1.23	0.9794	0.935	1.0184	1.1465
Long Chain Fatty Acid	eicosenoate (20:1)	LC/MS neg	33587		HMDB02231	5282768	0.92	1.15	1.0566	0.9634	0.9722	1.1048
Long Chain Fatty Acid	erucate (22:1n9)	LC/MS neg	1552	C08316	HMDB02068	5281116	0.9	1.26	1.0738	0.8756	0.9685	1.1066
Long Chain Fatty Acid	oleate/vaccenate (18:1)	LC/MS neg	52285				0.9	1.5	1.092	0.7951	0.9857	1.1944
Polyunsaturated Fatty Acid (n3 and n6)	eicosapentaenoate (EPA; 20:5n3)	LC/MS neg	18467	C06428	HMDB01999	446284	1.09	2.13	0.9654	0.674	1.0541	1.4334
Polyunsaturated Fatty Acid (n3 and n6)	docosapentaenoate (n3 DPA; 22:5n3)	LC/MS neg	32504	C16513	HMDB01976	6441454	1.16	1.92	0.9474	0.6593	1.1012	1.2627
Polyunsaturated Fatty Acid (n3 and n6)	docosahexaenoate (DHA; 22:6n3)	LC/MS neg	44675	C06429	HMDB02183	445580	1.05	1.34	0.9874	0.8592	1.0413	1.1501
Polyunsaturated Fatty Acid (n3 and n6)	docosatrienoate (22:3n3)	LC/MS neg	32417	C16534	HMDB02823	5312556	1.36	1.74	0.8051	0.8245	1.0921	1.4384
Polyunsaturated Fatty Acid (n3 and n6)	linoleate (18:2n6)	LC/MS neg	1105	C01595	HMDB00673	5280450	1.08	2.09	0.9194	0.6246	0.9963	1.303
Polyunsaturated Fatty Acid (n3 and n6)	linolenate [alpha or gamma; (18:3n3 or 6)]	LC/MS neg	34035	C06426	HMDB03073	5280934	1.21	1.98	0.9399	0.7341	1.1366	1.4532
Polyunsaturated Fatty Acid (n3 and n6)	dihomo-linolenate (20:3n3 or n6)	LC/MS neg	35718	C03242	HMDB02925	5280581	1.36	2.89	0.9145	0.4872	1.244	1.4086
Polyunsaturated Fatty Acid (n3 and n6)	arachidonate (20:4n6)	LC/MS neg	1110	C00219	HMDB01043	444899	1.23	2.46	0.9093	0.5592	1.1154	1.3747
Polyunsaturated Fatty Acid (n3 and n6)	adrenate (22:4n6)	LC/MS neg	32980	C16527	HMDB02226	5497181	0.99	2.14	1.1071	0.6702	1.0971	1.434
Polyunsaturated Fatty Acid (n3 and n6)	docosapentaenoate (n6 DPA; 22:5n6)	LC/MS neg	37478	C16513	HMDB01976	6441454	1.02	1.62	1.0096	0.7553	1.0301	1.2271
Polyunsaturated Fatty Acid (n3 and n6)	docosadienoate (22:2n6)	LC/MS neg	32415	C16533	HMDB61714	5282807	0.91	1.22	0.9889	0.9479	0.8991	1.1541
Polyunsaturated Fatty Acid (n3 and n6)	dihomo-linoleate (20:2n6)	LC/MS neg	17805	C16525	HMDB05060	6439848	1.1	1.52	0.9558	0.9342	1.0537	1.4173
Polyunsaturated Fatty Acid (n3 and n6)	mead acid (20:3n9)	LC/MS neg	35174		HMDB10378	5312531	0.98	1.81	1.051	0.7789	1.0281	1.4083
Fatty Acid, Branched	17-methylstearate	LC/MS neg	38296			3083779	1.05	1.18	0.9259	0.9742	0.9747	1.1456
Fatty Acid, Dicarboxylate	2-hydroxyglutarate	LC/MS polar	37253	C02630	HMDB00606	43	1.07	1.39	1.4518	0.5315	1.5528	0.7371
Fatty Acid, Dicarboxylate	2-hydroxyadipate	LC/MS polar	31934	C02360	HMDB00321	193530	1.57	1.07	0.8279	0.8425	1.3039	0.9045
Fatty Acid, Dicarboxylate	maleate	LC/MS polar	20676	C01384	HMDB00176	444266	0.97	1.11	0.9894	1.0645	0.9595	1.1832
Fatty Acid Synthesis	malonate	LC/MS polar	15872	C00383	HMDB00691	867	0.77	0.85	1.2896	1.0458	0.9912	0.8861
Fatty Acid Metabolism	acetyl CoA	LC/MS neg	43840	C00024	HMDB01206	444493	0.09	0.23	0.9026	5.3418	0.0777	1.2339
Fatty Acid Metabolism	myristoyl CoA	LC/MS neg	36859	C02593	HMDB01521	65113	0.68	0.8	0.9577	1.337	0.6521	1.0657
Fatty Acid Metabolism (also BCAA Metabolism)	butyrylcarnitine	LC/MS pos early	32412	C02862	HMDB02013	439829	1.61	0.21	0.4409	8.0612	0.7099	1.6808
Fatty Acid Metabolism (also BCAA Metabolism)	propionylcarnitine	LC/MS pos early	32452	C03017	HMDB00824	107738	0.95	0.36	0.7632	3.468	0.7217	1.2516
Fatty Acid Metabolism(Acyl Carnitine)	acetylcarnitine	LC/MS pos early	32198	C02571	HMDB00201	1	0.86	0.33	1.1215	2.3873	0.9679	0.7869
Fatty Acid Metabolism(Acyl Carnitine)	3-hydroxybutyrylcarnitine (1)	LC/MS pos early	43264		HMDB13127	53481617	1.36	0.95	0.75	1.0961	1.0208	1.0414
Fatty Acid Metabolism(Acyl Carnitine)	3-hydroxybutyrylcarnitine (2)	LC/MS pos early	52984				1.67	1.43	0.7876	0.8416	1.3143	1.2015
Fatty Acid Metabolism(Acyl Carnitine)	myristoylcarnitine	LC/MS pos late	33952		HMDB05066	53477791	0.74	0.32	0.547	4.3442	0.4056	1.3838
Fatty Acid Metabolism(Acyl Carnitine)	palmitoylcarnitine	LC/MS pos late	44681	C02990	HMDB00222	461	1.3	0.67	0.3435	2.3756	0.4449	1.5921
Fatty Acid Metabolism(Acyl Carnitine)	palmitoleoylcarnitine*	LC/MS pos late	53223				0.86	0.47	0.4867	2.2267	0.418	1.0435
Fatty Acid Metabolism(Acyl Carnitine)	stearoylcarnitine	LC/MS pos late	34409		HMDB00848	6426855	1.16	0.48	0.4202	2.8228	0.487	1.3627
Fatty Acid Metabolism(Acyl Carnitine)	oleoylcarnitine	LC/MS pos late	35160		HMDB05065	6441392;53477789	1.32	0.6	0.3915	2.4441	0.5181	1.4785
Carnitine Metabolism	deoxycarnitine	LC/MS pos early	36747	C01181	HMDB01161	134	1.22	0.75	0.7166	1.5807	0.8723	1.1813
Carnitine Metabolism	carnitine	LC/MS pos early	15500	C00318	HMDB00062	10917	1.48	0.9	0.5839	1.3586	0.8619	1.2205
Ketone Bodies	3-hydroxybutyrate (BHBA)	LC/MS polar	542	C01089	HMDB00357	441	0.9	0.72	1.0684	1.1966	0.965	0.8657
Neurotransmitter	acetylcholine	LC/MS pos early	18790				0.39	0.12	0.8717	5.026	0.3392	0.6082
Fatty Acid, Monohydroxy	4-hydroxybutyrate (GHB)	LC/MS polar	34585	C00989	HMDB00710	10413	0.56	0.9	1.9244	0.8729	1.0732	0.7889
Fatty Acid, Monohydroxy	3-hydroxylaurate	LC/MS neg	32457		HMDB00387	94216	0.45	0.58	1.1807	1.4051	0.5269	0.8186
Fatty Acid, Monohydroxy	3-hydroxymyristate	LC/MS neg	21158			16064	0.3	0.43	1.5822	1.6407	0.4686	0.7028
Endocannabinoid	oleoyl ethanolamide	LC/MS neg	38102		HMDB02088	5283454	1.07	1.38	0.9389	0.9029	1.007	1.2476
Endocannabinoid	palmitoyl ethanolamide	LC/MS neg	38165	C16512	HMDB02100	4671	1.27	1.38	0.8395	0.9346	1.0668	1.293
Endocannabinoid	stearoyl ethanolamide	LC/MS pos late	38625		HMDB13078	27902	1.09	1.3	0.981	0.8147	1.0724	1.0614
Inositol Metabolism	myo-inositol	LC/MS polar	1124	C00137	HMDB00211	892	1.11	1.18	0.6781	1.4535	0.7508	1.7215
Phospholipid Metabolism	choline	LC/MS pos early	15506	C00114	HMDB00097	305	0.75	0.95	0.9295	1.053	0.693	1.003
Phospholipid Metabolism	choline phosphate	LC/MS pos early	34396	C00588	HMDB01565	1014	1.15	0.89	0.7599	1.3432	0.8726	1.1996
Phospholipid Metabolism	cytidine 5'-diphosphocholine	LC/MS pos early	34418	C00307	HMDB01413	13804	0.79	0.78	0.6728	1.4979	0.5282	1.1748
Phospholipid Metabolism	glycerophosphorylcholine (GPC)	LC/MS pos early	15990	C00670	HMDB00086	71920	0.82	1.06	0.7893	1.2318	0.6487	1.3103
Phospholipid Metabolism	cytidine-5'-diphosphoethanolamine	LC/MS pos early	34410	C00570	HMDB01564	123727	0.72	0.7	0.6967	1.7308	0.499	1.2188
Phospholipid Metabolism	glycerophosphoethanolamine	LC/MS polar	37455	C01233	HMDB00114	123874	0.54	0.56	1.0022	1.8497	0.5433	1.0417
Phospholipid Metabolism	trimethylamine N-oxide	LC/MS pos early	40406	C01104	HMDB00925	1145	0.98	0.89	0.9507	1.2166	0.9362	1.0885
Phospholipid Metabolism	glycerophosphoinositol*	LC/MS polar	47155				1.58	1.41	0.6736	0.9476	1.0623	1.339
Phospholipid Metabolism	1,2-dipalmitoyl-GPC (16:0/16:0)	LC/MS pos late	19130		HMDB00564	452110	0.87	0.81	0.9757	1.2369	0.8461	1.0027
Phospholipid Metabolism	1-palmitoyl-2-oleoyl-GPC (16:0/18:1)	LC/MS pos late	52461			6436017	0.89	1	0.9582	1.1482	0.8502	1.1427
Phospholipid Metabolism	1-palmitoyl-2-linoleoyl-GPC (16:0/18:2)	LC/MS pos late	42446			5287971	0.94	1.07	0.8383	1.1084	0.7876	1.1827
Phospholipid Metabolism	1-stearoyl-2-arachidonoyl-GPC (18:0/20:4)	LC/MS pos late	42450			16219824	1.22	1.38	0.7459	1.1086	0.9072	1.5304
Phospholipid Metabolism	1-stearoyl-2-oleoyl-GPC (18:0/18:1)	LC/MS pos late	52438				0.89	0.89	0.9359	1.1992	0.8298	1.0706
Phospholipid Metabolism	1,2-dioleoyl-GPC (18:1/18:1)*	LC/MS pos late	52457			10350317	0.83	0.95	0.9782	1.1458	0.8103	1.0885
Phospholipid Metabolism	1-palmitoyl-2-arachidonoyl-GPC (16:0/20:4)	LC/MS pos late	52462			10747814	1.34	1.52	0.7503	1.0576	1.0029	1.6066
Phospholipid Metabolism	1-palmitoleoyl-2-oleoyl-GPC (16:1/18:1)*	LC/MS pos late	52458				0.85	0.93	1.0495	1.0784	0.8875	0.9976
Phospholipid Metabolism	1-palmitoyl-2-palmitoleoyl-GPC (16:0/16:1)*	LC/MS pos late	52470				0.95	0.97	0.9593	1.0752	0.9066	1.0442
Phospholipid Metabolism	1-stearoyl-2-arachidonoyl-GPI (18:0/20:4)	LC/MS polar	52449				0.82	1	0.9371	1.3053	0.7682	1.3026
Phospholipid Metabolism	1-oleoyl-2-linoleoyl-GPC (18:1/18:2)*	LC/MS pos late	52453				0.82	1.04	0.8917	1.0776	0.7287	1.1217
Phospholipid Metabolism	1-palmitoyl-2-oleoyl-GPG (16:0/18:1)	LC/MS polar	52448			5283509	0.71	0.79	1.293	1.1473	0.922	0.9092
Phospholipid Metabolism	1-palmitoyl-2-oleoyl-GPE (16:0/18:1)	LC/MS pos late	19263		HMDB05320	5283496	0.9	0.89	0.9926	1.088	0.8922	0.9702
Phospholipid Metabolism	1-stearoyl-2-arachidonoyl-GPE (18:0/20:4)	LC/MS pos late	52447			5289133	1.28	1.36	0.7812	0.9797	0.9992	1.333
Phospholipid Metabolism	1-stearoyl-2-oleoyl-GPE (18:0/18:1)	LC/MS pos late	42448				0.75	0.8	1.0542	1.1431	0.7939	0.9089
Phospholipid Metabolism	1-palmitoyl-2-arachidonoyl-GPE (16:0/20:4)*	LC/MS pos late	52464		HMDB05323	9546800	1.25	1.27	0.8076	0.9816	1.0098	1.2479
Phospholipid Metabolism	1-palmitoyl-2-linoleoyl-GPE (16:0/18:2)	LC/MS pos late	42449		HMDB05322	9546747	0.8	0.9	1.0606	1.0495	0.8491	0.9395
Phospholipid Metabolism	1,2-dioleoyl-GPG (18:1/18:1)	LC/MS polar	19142			11846228	0.86	0.84	1.0175	1.1257	0.8775	0.9451
Phospholipid Metabolism	1,2-dioleoyl-GPI (18:1/18:1)	LC/MS polar	52619				0.93	1.03	1.0588	1.0212	0.9863	1.0499
Phospholipid Metabolism	1-palmitoyl-2-stearoyl-GPC (16:0/18:0)	LC/MS pos late	52616				0.81	0.7	1.0244	1.4907	0.8247	1.0409
Phospholipid Metabolism	1,2-dioleoyl-GPE (18:1/18:1)	LC/MS pos late	52609			9546757	0.64	0.69	1.2107	1.3161	0.7719	0.9024
Phospholipid Metabolism	1,2-distearoyl-GPG (18:0/18:0)	LC/MS polar	52624				1.05	1.33	0.9058	1.0367	0.9498	1.3752
Phospholipid Metabolism	1-palmitoyl-2-oleoyl-GPI (16:0/18:1)*	LC/MS polar	52669				1.02	1.01	0.9447	1.0033	0.9609	1.0166
Phospholipid Metabolism	1,2-dioleoyl-GPS (18:1/18:1)	LC/MS polar	19191			6438639	0.87	0.99	0.9511	1.1147	0.8258	1.1051
Phospholipid Metabolism	1-palmitoyl-2-alpha-linolenoyl-GPC (16:0/18:3n3)*	LC/MS pos late	52684				1.08	1.14	0.862	1.1574	0.9328	1.3137
Phospholipid Metabolism	1-palmitoleoyl-2-linoleoyl-GPC (16:1/18:2)*	LC/MS pos late	52683				0.92	1.18	0.9426	1.0581	0.8661	1.2512
Phospholipid Metabolism	1,2-dilinoleoyl-GPC (18:2/18:2)	LC/MS pos late	52603			5288075	1.05	1.27	0.8487	1.1319	0.8875	1.4321
Phospholipid Metabolism	1,2-dilinoleoyl-GPE (18:2/18:2)*	LC/MS pos late	53174			9546812	0.67	0.72	1.1954	1.2589	0.8008	0.9122
Phospholipid Metabolism	1-oleoyl-2-linoleoyl-GPE (18:1/18:2)*	LC/MS pos late	52687		HMDB05349	9546753	0.6	0.66	1.1625	1.2816	0.6936	0.8423
Phospholipid Metabolism	1,2-distearoyl-GPC (18:0/18:0)	LC/MS pos late	19132			94190	0.89	0.63	1.0373	1.5429	0.924	0.9772
Phospholipid Metabolism	1-linoleoyl-2-arachidonoyl-GPC (18:2/20:4n6)*	LC/MS pos late	52710				1.2	1.25	0.742	1.087	0.8927	1.3626
Phospholipid Metabolism	1-linoleoyl-2-arachidonoyl-GPE (18:2/20:4)*	LC/MS pos late	53189				0.77	0.51	1.2792	1.0535	0.9905	0.5344
Phospholipid Metabolism	1-palmitoyl-2-oleoyl-GPS (16:0/18:1)	LC/MS polar	19261	C13880		5283499	1.03	1.1	0.8951	1.1261	0.9249	1.2435
Phospholipid Metabolism	oleoylcholine	LC/MS pos late	53260				1.19	1.28	0.6	1.5713	0.7166	2.0106
Phospholipid Metabolism	palmitoloelycholine	LC/MS pos late	53257				0.99	1.41	0.5768	1.1617	0.5696	1.6402
Phospholipid Metabolism	1-palmitoyl-2-gamma-linolenoyl-GPC (16:0/18:3n6)*	LC/MS pos late	54812				0.84	0.96	0.9159	1.0956	0.7695	1.0526
Phosphatidylserine (PS)	1-stearoyl-2-arachidonoyl-GPS (18:0/20:4)	LC/MS pos late	52235				1.07	1.19	0.8897	1.029	0.9543	1.222
Phosphatidylserine (PS)	1-stearoyl-2-oleoyl-GPS (18:0/18:1)	LC/MS polar	48494			9547087	0.92	1.03	0.9322	1.2076	0.8604	1.2378
Lysolipid	1-palmitoyl-GPC (16:0)	LC/MS pos late	33955		HMDB10382	86554	1.1	1.58	0.992	0.7755	1.0875	1.2262
Lysolipid	2-palmitoyl-GPC (16:0)*	LC/MS neg	35253		HMDB61702	15061532	1.14	1.55	1.0118	0.751	1.1567	1.1625
Lysolipid	1-palmitoleoyl-GPC (16:1)*	LC/MS pos late	33230		HMDB10383	24779461	1.06	1.72	1.1015	0.8133	1.1673	1.4023
Lysolipid	2-palmitoleoyl-GPC (16:1)*	LC/MS pos late	35819				1.05	1.85	1.0225	0.6983	1.0712	1.2902
Lysolipid	1-stearoyl-GPC (18:0)	LC/MS pos late	33961		HMDB10384	497299	1.03	1.28	0.9789	0.9107	1.0086	1.1682
Lysolipid	1-oleoyl-GPC (18:1)	LC/MS pos late	48258		HMDB02815	16081932	0.96	1.09	1.0697	1.0067	1.024	1.0978
Lysolipid	1-linoleoyl-GPC (18:2)	LC/MS pos late	34419	C04100	HMDB10386	11988421	1.13	1.68	0.876	0.8449	0.9942	1.4203
Lysolipid	1-arachidonoyl-GPC (20:4n6)*	LC/MS pos late	33228	C05208	HMDB10395		1.42	1.87	0.7272	0.9607	1.0305	1.7973
Lysolipid	1-lignoceroyl-GPC (24:0)	LC/MS pos late	49617				1.31	1.48	0.965	0.7238	1.2651	1.0702
Lysolipid	1-palmitoyl-GPE (16:0)	LC/MS pos late	35631		HMDB11503	9547069	1.08	1.03	1.0129	1.0033	1.0985	1.029
Lysolipid	1-stearoyl-GPE (18:0)	LC/MS pos late	42398		HMDB11130	9547068	1.1	1.11	1.0073	0.9599	1.1081	1.0647
Lysolipid	2-stearoyl-GPE (18:0)*	LC/MS neg	41220				1.23	0.91	1.0407	1.1101	1.2844	1.0068
Lysolipid	1-oleoyl-GPE (18:1)	LC/MS pos late	35628		HMDB11506	9547071	0.78	0.89	1.1151	1.0568	0.872	0.9429
Lysolipid	1-linoleoyl-GPE (18:2)*	LC/MS pos late	36600		HMDB11507	52925130	0.84	1.08	1.0572	1.0592	0.8884	1.1454
Lysolipid	1-arachidonoyl-GPE (20:4n6)*	LC/MS neg	35186		HMDB11517	42607465	0.77	1	1.3206	1.0418	1.0163	1.0435
Lysolipid	1-palmitoyl-GPI (16:0)*	LC/MS neg	35305		HMDB61695		1.26	1.8	1.0239	0.6922	1.2934	1.2442
Lysolipid	1-stearoyl-GPI (18:0)	LC/MS neg	19324		HMDB61696		0.91	1.57	1.1671	0.6231	1.066	0.98
Lysolipid	1-oleoyl-GPI (18:1)*	LC/MS neg	36602				1.03	2.24	1.194	0.4966	1.2316	1.1123
Lysolipid	1-arachidonoyl-GPI (20:4)*	LC/MS neg	34214		HMDB61690		1.08	3.34	1.021	0.3891	1.1052	1.2983
Lysolipid	1-stearoyl-GPS (18:0)*	LC/MS neg	45966			9547101	1.41	1.75	0.916	0.6103	1.2873	1.0655
Lysolipid	1-oleoyl-GPS (18:1)	LC/MS neg	19260			9547099	1.21	1.88	1.1515	0.6732	1.3961	1.2657
Lysolipid	1-palmitoyl-GPG (16:0)*	LC/MS neg	45970			3300276	0.6	0.63	1.5007	1.2196	0.8988	0.7732
Lysolipid	1-palmitoyl-GPS (16:0)*	LC/MS neg	46130			9547100	1.67	1.79	0.8472	0.708	1.4132	1.2651
Lysolipid	1-stearoyl-GPG (18:0)	LC/MS neg	34437				0.52	0.55	1.6696	1.2015	0.8681	0.6653
Lysolipid	1-oleoyl-GPG (18:1)*	LC/MS neg	45968				0.42	0.43	1.2165	1.0771	0.5149	0.4665
Plasmalogen	1-(1-enyl-palmitoyl)-2-oleoyl-GPE (P-16:0/18:1)*	LC/MS pos late	52477				0.69	0.67	1.1533	1.2992	0.7928	0.8698
Plasmalogen	1-(1-enyl-palmitoyl)-2-palmitoyl-GPC (P-16:0/16:0)*	LC/MS pos late	52716			11146967	1.51	1.43	0.69	0.9482	1.0423	1.3565
Plasmalogen	1-(1-enyl-palmitoyl)-2-palmitoleoyl-GPC (P-16:0/16:1)*	LC/MS pos late	52713				1.68	1.71	0.7142	0.8667	1.2007	1.4792
Plasmalogen	1-(1-enyl-palmitoyl)-2-arachidonoyl-GPE (P-16:0/20:4)*	LC/MS pos late	52673				1.03	1.06	0.8946	1.145	0.9177	1.2119
Plasmalogen	1-(1-enyl-palmitoyl)-2-oleoyl-GPC (P-16:0/18:1)*	LC/MS pos late	52478				1.44	1.38	0.7112	0.9501	1.025	1.3097
Plasmalogen	1-(1-enyl-stearoyl)-2-oleoyl-GPE (P-18:0/18:1)	LC/MS pos late	52614				0.67	0.69	1.0987	1.2568	0.7323	0.8641
Plasmalogen	1-(1-enyl-palmitoyl)-2-arachidonoyl-GPC (P-16:0/20:4)*	LC/MS pos late	52689				2.63	2.94	0.4391	0.8627	1.1529	2.5323
Plasmalogen	1-(1-enyl-palmitoyl)-2-linoleoyl-GPC (P-16:0/18:2)*	LC/MS pos late	52682				1.69	1.77	0.7173	0.8547	1.2133	1.5142
Plasmalogen	1-(1-enyl-stearoyl)-2-arachidonoyl-GPE (P-18:0/20:4)*	LC/MS pos late	52475		HMDB05779	9547058	0.92	0.92	0.8707	1.1866	0.8018	1.0867
Lysoplasmalogen	1-(1-enyl-palmitoyl)-GPC (P-16:0)*	LC/MS pos late	52474			10917802	1.86	2.71	0.7506	0.7462	1.3932	2.0197
Lysoplasmalogen	1-(1-enyl-palmitoyl)-GPE (P-16:0)*	LC/MS pos late	39270				1.03	1.23	0.9925	0.9375	1.0176	1.1556
Lysoplasmalogen	1-(1-enyl-oleoyl)-GPE (P-18:1)*	LC/MS pos late	44621				0.91	1.31	1.0855	0.9256	0.9887	1.2082
Lysoplasmalogen	1-(1-enyl-stearoyl)-GPE (P-18:0)*	LC/MS pos late	39271				0.86	1.09	1.097	1.0577	0.9466	1.1518
Lysoplasmalogen	1-(1-enyl-oleoyl)-2-oleoyl-GPE (P-18:1/18:1)*	LC/MS pos late	54691		HMDB11441		0.7	0.76	1.0971	1.1653	0.7665	0.8811
Glycerolipid Metabolism	glycerol	LC/MS neg	15122	C00116	HMDB00131	753	4.64	1.59	0.3659	0.7521	1.6979	1.1921
Glycerolipid Metabolism	glycerol 3-phosphate	LC/MS polar	43847	C00093	HMDB00126	754	1.24	1.22	0.577	1.3496	0.7168	1.6409
Glycerolipid Metabolism	glycerophosphoglycerol	LC/MS polar	48857	C03274		439964	0.67	0.56	1.2241	1.1355	0.8227	0.6328
Monoacylglycerol	1-palmitoylglycerol (16:0)	LC/MS neg	21127		HMDB31074	14900	0.79	0.96	1.1469	0.9746	0.9034	0.9385
Monoacylglycerol	2-palmitoylglycerol (16:0)	LC/MS neg	33419		HMDB11533	123409	0.68	0.7	1.2544	1.1867	0.8509	0.835
Monoacylglycerol	1-oleoylglycerol (18:1)	LC/MS neg	21184		HMDB11567	5283468	0.74	0.86	1.0721	1.0611	0.7956	0.9145
Monoacylglycerol	2-oleoylglycerol (18:1)	LC/MS neg	21232			5319879	0.63	0.65	1.2656	1.2673	0.7951	0.8253
Monoacylglycerol	1-linoleoylglycerol (18:2)	LC/MS neg	27447			5283469	0.64	0.75	1.036	1.3675	0.6658	1.0215
Monoacylglycerol	2-linoleoylglycerol (18:2)	LC/MS neg	32506		HMDB11538	5365676	0.63	0.72	1.0397	1.4276	0.6507	1.0233
Monoacylglycerol	1-arachidonylglycerol (20:4)	LC/MS neg	34397	C13857	HMDB11572	5282281	0.49	0.8	1.3565	1.1266	0.6703	0.8975
Monoacylglycerol	2-arachidonoylglycerol (20:4)	LC/MS neg	19266	C13856	HMDB04666	5282280	0.52	0.79	1.2328	1.1778	0.6438	0.9269
Monoacylglycerol	1-dihomo-linolenylglycerol (20:3)	LC/MS neg	48341				0.62	0.84	1.215	1.0989	0.7593	0.9244
Monoacylglycerol	1-palmitoleoylglycerol (16:1)*	LC/MS neg	52431				0.59	0.64	1.2922	1.159	0.7638	0.7408
Monoacylglycerol	2-palmitoleoylglycerol (16:1)*	LC/MS neg	52432				0.59	0.58	1.2953	1.1972	0.7696	0.6973
Diacylglycerol	1-oleoyl-3-linoleoyl-glycerol (18:1/18:2)	LC/MS pos late	46799				0.71	0.65	1.0304	1.465	0.7353	0.9584
Diacylglycerol	1-palmitoleoyl-3-oleoyl-glycerol (16:1/18:1)*	LC/MS pos late	52631				0.66	0.39	1.1396	0.9762	0.7548	0.3762
Diacylglycerol	1-palmitoyl-3-linoleoyl-glycerol (16:0/18:2)*	LC/MS pos late	52634				0.88	0.54	0.9856	1.5747	0.8671	0.8553
Sphingolipid Metabolism	N-palmitoyl-sphinganine (d18:0/16:0)	LC/MS pos late	52604		HMDB11760	5283572	1.73	1.76	0.7492	0.7622	1.2933	1.3416
Sphingolipid Metabolism	sphinganine	LC/MS pos late	17769	C00836	HMDB00269	3126	1.32	1.24	0.7801	0.8776	1.0324	1.0896
Sphingolipid Metabolism	phytosphingosine	LC/MS pos late	1510	C12144	HMDB04610	122121	0.96	0.93	0.8904	1.1946	0.8572	1.115
Sphingolipid Metabolism	palmitoyl sphingomyelin (d18:1/16:0)	LC/MS pos late	37506			9939941	1.27	1.59	0.8317	0.9224	1.0529	1.4701
Sphingolipid Metabolism	stearoyl sphingomyelin (d18:1/18:0)	LC/MS pos late	19503	C00550	HMDB01348	6453725	2.3	2.86	0.5748	0.6852	1.3203	1.9592
Sphingolipid Metabolism	sphingomyelin (d18:1/18:1, d18:2/18:0)	LC/MS pos late	37529			6443882	3.85	5.76	0.4177	0.4531	1.6064	2.6082
Sphingolipid Metabolism	sphingosine	LC/MS pos late	17747	C00319	HMDB00252	5353955	0.97	1.05	0.9493	1.057	0.9214	1.1055
Sphingolipid Metabolism	N-palmitoyl-sphingosine (d18:1/16:0)	LC/MS pos late	44877		HMDB04949	5283564	0.9	0.98	0.9524	1.1512	0.8563	1.1303
Sphingolipid Metabolism	sphingomyelin (d18:1/14:0, d16:1/16:0)*	LC/MS pos late	42463			11433862	1.59	1.97	0.7432	0.8932	1.1795	1.7627
Sphingolipid Metabolism	sphingomyelin (d18:2/14:0, d18:1/14:1)*	LC/MS pos late	47154				2.14	2.27	0.5684	0.7618	1.2185	1.7271
Sphingolipid Metabolism	sphingomyelin (d18:1/24:1, d18:2/24:0)*	LC/MS pos late	47153				2.03	2.32	0.6373	0.7565	1.2929	1.7569
Sphingolipid Metabolism	sphingomyelin (d18:2/16:0, d18:1/16:1)*	LC/MS pos late	42459				2.09	2.75	0.635	0.7665	1.3299	2.1063
Sphingolipid Metabolism	sphingomyelin (d18:1/20:1, d18:2/20:0)*	LC/MS pos late	48491				2.24	3.85	0.6296	0.6017	1.4114	2.3175
Sphingolipid Metabolism	behenoyl sphingomyelin (d18:1/22:0)*	LC/MS pos late	48492				1.79	2.15	0.6836	0.7929	1.2236	1.7067
Sphingolipid Metabolism	sphingomyelin (d18:1/22:1, d18:2/22:0, d16:1/24:1)*	LC/MS pos late	48493				4.74	6.3	0.3576	0.4366	1.6965	2.7509
Sphingolipid Metabolism	sphingomyelin (d18:1/20:0, d16:1/22:0)*	LC/MS pos late	48490				1.54	1.89	0.7238	0.8871	1.1124	1.6791
Sphingolipid Metabolism	palmitoyl dihydrosphingomyelin (d18:0/16:0)*	LC/MS pos late	52434			9939965	2.48	3.03	0.5763	0.6611	1.4297	2.0026
Sphingolipid Metabolism	sphingomyelin (d18:1/15:0, d16:1/17:0)*	LC/MS pos late	52433				1.53	1.95	0.7713	0.8815	1.1833	1.7174
Sphingolipid Metabolism	sphingomyelin (d18:1/21:0, d17:1/22:0, d16:1/23:0)*	LC/MS pos late	52495				4.44	2.78	0.5555	0.9199	2.4688	2.5606
Sphingolipid Metabolism	sphingomyelin (d18:2/23:0, d18:1/23:1, d17:1/24:1)*	LC/MS pos late	52435				5.31	5.32	0.3293	0.5529	1.7497	2.9391
Sphingolipid Metabolism	sphingomyelin (d18:2/24:1, d18:1/24:2)*	LC/MS pos late	52437				4.43	5.8	0.3734	0.449	1.6557	2.6062
Sphingolipid Metabolism	tricosanoyl sphingomyelin (d18:1/23:0)*	LC/MS pos late	52436				2.06	2.58	0.64	0.7167	1.3161	1.8507
Sphingolipid Metabolism	sphingomyelin (d18:1/17:0, d17:1/18:0, d19:1/16:0)	LC/MS pos late	52615				1.92	2.26	0.6335	0.797	1.2164	1.7992
Sphingolipid Metabolism	glycosyl-N-stearoyl-sphingosine	LC/MS pos late	52234				1.61	2.05	0.672	0.9169	1.0803	1.8812
Sphingolipid Metabolism	glycosyl-N-palmitoyl-sphingosine	LC/MS pos late	53013				1.18	1.56	0.8715	0.886	1.0266	1.38
Sphingolipid Metabolism	lactosyl-N-palmitoyl-sphingosine	LC/MS pos late	53010				7.97	9.63	0.2377	0.2634	1.8955	2.5355
Mevalonate Metabolism	3-hydroxy-3-methylglutarate	LC/MS polar	531	C03761	HMDB00355	1662	0.85	0.8	0.9542	1.3543	0.8142	1.0864
Sterol	cholesterol	LC/MS pos late	63	C00187	HMDB00067	11025495	1.07	1.13	0.8467	1.0473	0.9027	1.1793
Sterol	7-hydroxycholesterol (alpha or beta)	LC/MS pos late	47890				1.28	1.24	0.7487	1.0357	0.9566	1.2802
Fatty Acid Metabolism (Acyl Choline)	palmitoylcholine	LC/MS pos late	52944			151731	1.19	1.27	0.4099	1.3087	0.4885	1.6645
