# Supplementary material for: SIRT1 regulates sphingolipid metabolism and neural differentiation of mouse embryonic stem cells through c-Myc-SMPDL3B
Source: eLife. 2021 May 27;10:e67452. doi: 10.7554/eLife.67452 (PMC8216717; doi:10.7554/eLife.67452)
Supplement: Supplementary file 2. [file elife-67452-supp2.xlsx]

## Sheet: Sheet1
Table S2. Sphingolipid profiles of WT and SIRT1 KO ESCs cultured in complete medium or a methionine rescricted medium containing 6 uM methionine (MR) for 6 hours
Biochemical Name	Platform	Comp ID	KEGG	HMDB	PubChem	mESCs						hESCs
						SIRT1 KO WT		Mean Values				SIRT1 KO WT		Mean Values
								WT Complete	WT MR	SIRT1 KO Complete	SIRT1 KO MR			WT Complete	WT MR	SIRT1 KO Complete	SIRT1 KO MR
						Complete	MR					Complete	MR
3-ketosphinganine	LC/MS pos late	34381	C02934	HMDB01480	631							1.55	1.55	0.7432	0.8358	1.1539	1.2957
N-palmitoyl-sphinganine (d18:0/16:0)	LC/MS pos late	52604		HMDB11760	5283572	1.73	1.76	0.7492	0.7622	1.2933	1.3416	0.88	0.89	0.9625	1.1542	0.8465	1.026
sphinganine	LC/MS pos late	17769	C00836	HMDB00269	3126	1.32	1.24	0.7801	0.8776	1.0324	1.0896	1.57	1.42	0.7803	0.8717	1.2285	1.2355
phytosphingosine	LC/MS pos late	1510	C12144	HMDB04610	122121	0.96	0.93	0.8904	1.1946	0.8572	1.115	1.84	1.71	0.8114	0.83	1.493	1.4227
palmitoyl sphingomyelin (d18:1/16:0)	LC/MS pos late	37506			9939941	1.27	1.59	0.8317	0.9224	1.0529	1.4701	1.12	1.1	0.9371	0.9743	1.0535	1.0739
stearoyl sphingomyelin (d18:1/18:0)	LC/MS pos late	19503	C00550	HMDB01348	6453725	2.3	2.86	0.5748	0.6852	1.3203	1.9592	1.02	1.02	0.981	1.001	1.0049	1.0193
sphingomyelin (d18:1/18:1, d18:2/18:0)	LC/MS pos late	37529			6443882	3.85	5.76	0.4177	0.4531	1.6064	2.6082	1.01	0.97	0.9845	0.9776	0.9978	0.9478
sphingosine	LC/MS pos late	17747	C00319	HMDB00252	5353955	0.97	1.05	0.9493	1.057	0.9214	1.1055	2.05	1.78	0.6897	0.7876	1.4139	1.3997
N-palmitoyl-sphingosine (d18:1/16:0)	LC/MS pos late	44877		HMDB04949	5283564	0.9	0.98	0.9524	1.1512	0.8563	1.1303	0.92	1.1	0.8592	1.0459	0.7911	1.1488
sphingomyelin (d18:1/14:0, d16:1/16:0)*	LC/MS pos late	42463			11433862	1.59	1.97	0.7432	0.8932	1.1795	1.7627	1.17	1.09	0.9148	1.0206	1.0678	1.1163
sphingomyelin (d18:2/14:0, d18:1/14:1)*	LC/MS pos late	47154				2.14	2.27	0.5684	0.7618	1.2185	1.7271	1.04	0.91	0.9733	1.0708	1.014	0.975
sphingomyelin (d18:1/24:1, d18:2/24:0)*	LC/MS pos late	47153				2.03	2.32	0.6373	0.7565	1.2929	1.7569	1.54	1.51	0.7978	0.8479	1.2324	1.2827
sphingomyelin (d18:2/16:0, d18:1/16:1)*	LC/MS pos late	42459				2.09	2.75	0.635	0.7665	1.3299	2.1063	1.08	1.04	0.9418	1.0109	1.0207	1.0499
sphingomyelin (d18:1/20:1, d18:2/20:0)*	LC/MS pos late	48491				2.24	3.85	0.6296	0.6017	1.4114	2.3175	0.88	0.97	1.0349	0.9993	0.9112	0.9688
behenoyl sphingomyelin (d18:1/22:0)*	LC/MS pos late	48492				1.79	2.15	0.6836	0.7929	1.2236	1.7067	1.55	1.34	0.7641	0.9232	1.1855	1.2389
sphingomyelin (d18:1/22:1, d18:2/22:0, d16:1/24:1)*	LC/MS pos late	48493				4.74	6.3	0.3576	0.4366	1.6965	2.7509	1.16	1.2	0.938	0.9545	1.0869	1.1498
sphingomyelin (d18:1/20:0, d16:1/22:0)*	LC/MS pos late	48490				1.54	1.89	0.7238	0.8871	1.1124	1.6791	1.25	1.17	0.8846	0.99	1.1044	1.1543
palmitoyl dihydrosphingomyelin (d18:0/16:0)*	LC/MS pos late	52434			9939965	2.48	3.03	0.5763	0.6611	1.4297	2.0026	1.11	1.09	0.8513	0.9556	0.9488	1.0453
sphingomyelin (d18:1/15:0, d16:1/17:0)*	LC/MS pos late	52433				1.53	1.95	0.7713	0.8815	1.1833	1.7174	1.11	1.06	0.9464	0.9737	1.0473	1.0314
sphingomyelin (d18:1/21:0, d17:1/22:0, d16:1/23:0)*	LC/MS pos late	52495				4.44	2.78	0.5555	0.9199	2.4688	2.5606	1.4	1.32	0.6353	0.7149	0.8894	0.9455
sphingomyelin (d18:2/23:0, d18:1/23:1, d17:1/24:1)*	LC/MS pos late	52435				5.31	5.32	0.3293	0.5529	1.7497	2.9391	2	1.72	0.6781	0.7187	1.3529	1.2351
sphingomyelin (d18:2/24:1, d18:1/24:2)*	LC/MS pos late	52437				4.43	5.8	0.3734	0.449	1.6557	2.6062	1.28	1.25	0.9218	0.966	1.1833	1.2049
tricosanoyl sphingomyelin (d18:1/23:0)*	LC/MS pos late	52436				2.06	2.58	0.64	0.7167	1.3161	1.8507	2.97	2.96	0.3957	0.3877	1.1744	1.1461
sphingomyelin (d18:1/17:0, d17:1/18:0, d19:1/16:0)	LC/MS pos late	52615				1.92	2.26	0.6335	0.797	1.2164	1.7992
glycosyl-N-stearoyl-sphingosine	LC/MS pos late	52234				1.61	2.05	0.672	0.9169	1.0803	1.8812	1.09	1.09	0.9229	0.9928	1.0095	1.0854
glycosyl-N-palmitoyl-sphingosine	LC/MS pos late	53013				1.18	1.56	0.8715	0.886	1.0266	1.38	1.16	1.14	0.9288	0.9902	1.0763	1.1245
lactosyl-N-palmitoyl-sphingosine	LC/MS pos late	53010				7.97	9.63	0.2377	0.2634	1.8955	2.5355	1.29	1.3	0.8881	0.9121	1.1437	1.1828
Notes:	n=5 for mESCs and 4 for mESCs.
