# Supplementary material for: SIRT1 regulates sphingolipid metabolism and neural differentiation of mouse embryonic stem cells through c-Myc-SMPDL3B
Source: eLife. 2021 May 27;10:e67452. doi: 10.7554/eLife.67452 (PMC8216717; doi:10.7554/eLife.67452)
Supplement: Supplementary file 3. [file elife-67452-supp3.xlsx]

## Sheet: q<0.01 
Table S3. Differential expresseed genes in SIRT1 KO mESCs vs WT mESCs cultured in ESGRO medium (q<0.01)
GeneNA	GeneType	GeneID	baseMean	log2FoldChange	lfcSE	stat	pvalue	padj
Olfr33	protein_coding	ENSMUSG00000066273.6	6.57356	6.22816	1.63786	3.80261	0.000143177	0.000827882
RP23-465A12.2	protein_coding	ENSMUSG00000045065.7	158.074	5.32967	0.423647	12.5804	2.7052e-36	2.50981e-34
Olfr1441	protein_coding	ENSMUSG00000050815.6	8.4756	4.66576	1.42492	3.27439	0.00105889	0.00494201
P2rx3	protein_coding	ENSMUSG00000027071.14	3066.56	4.52406	0.111816	40.4598	0	0
Pla2g2e	protein_coding	ENSMUSG00000028751.13	233.191	3.77555	0.269479	14.0105	1.34361e-44	1.83522e-42
Tmem125	protein_coding	ENSMUSG00000050854.9	612.506	3.69558	0.19325	19.1233	1.61593e-81	6.51299e-79
Fut1	protein_coding	ENSMUSG00000008461.6	125.365	3.67546	0.347141	10.5878	3.39535e-26	1.79523e-24
Fbln5	protein_coding	ENSMUSG00000021186.9	164.04	3.57697	0.26912	13.2913	2.59904e-40	2.91781e-38
Cdkn1c	protein_coding	ENSMUSG00000037664.13	819.23	3.51562	0.189205	18.581	4.57747e-77	1.67973e-74
Slamf9	protein_coding	ENSMUSG00000026548.4	103.391	3.4089	0.381648	8.93204	4.18218e-19	1.35651e-17
Krt17	protein_coding	ENSMUSG00000035557.9	1998.6	3.30858	0.109593	30.1897	3.23201e-200	6.62186e-197
Sgce	protein_coding	ENSMUSG00000004631.15	284.348	3.26819	0.235156	13.898	6.51763e-44	8.61518e-42
Phlda2	protein_coding	ENSMUSG00000010760.5	4014.48	3.18015	0.0823277	38.628	0	0
Moxd1	protein_coding	ENSMUSG00000020000.7	525.756	3.10955	0.173751	17.8966	1.25348e-71	4.28029e-69
Serpinb6c	protein_coding	ENSMUSG00000052180.15	1265.36	3.10806	0.116029	26.787	4.58545e-158	6.26321e-155
Cyp4f40	protein_coding	ENSMUSG00000090700.1	102.356	3.0865	0.36286	8.50603	1.79991e-17	5.02869e-16
Aldh1l2	protein_coding	ENSMUSG00000020256.14	3820.97	3.0068	0.102003	29.4775	5.59634e-191	1.0584e-187
Ccdc190	protein_coding	ENSMUSG00000070532.5	38.8903	2.99077	0.664794	4.49879	6.83401e-06	5.19225e-05
Tarm1	protein_coding	ENSMUSG00000053338.9	240.611	2.97572	0.258508	11.5112	1.15919e-30	8.33329e-29
C5ar2	protein_coding	ENSMUSG00000074361.10	11.0814	2.9528	0.965735	3.05757	0.00223139	0.00945553
Hrk	protein_coding	ENSMUSG00000046607.6	1927.27	2.91426	0.102969	28.3022	3.24452e-176	5.69783e-173
Serpina3m	protein_coding	ENSMUSG00000079012.11	537.618	2.86232	0.266254	10.7503	5.9043e-27	3.37589e-25
Tnfaip2	protein_coding	ENSMUSG00000021281.15	195.214	2.861	0.268492	10.6558	1.63816e-26	8.95323e-25
Serpinf1	protein_coding	ENSMUSG00000000753.15	964.641	2.84497	0.155218	18.3289	4.86434e-75	1.70849e-72
Ccdc27	protein_coding	ENSMUSG00000039492.7	27.7009	2.80886	0.737928	3.80641	0.000140998	0.000816433
Vldlr	protein_coding	ENSMUSG00000024924.14	2681.16	2.79857	0.11858	23.6006	3.80197e-123	3.5952e-120
Ccdc144b	protein_coding	ENSMUSG00000047696.16	15.2557	2.78729	0.844887	3.29901	0.000970271	0.00458399
Fam159b	protein_coding	ENSMUSG00000042655.5	146.46	2.77635	0.292969	9.47662	2.62641e-21	1.00269e-19
Tex24	protein_coding	ENSMUSG00000071138.4	18.4451	2.77253	0.85382	3.24721	0.00116543	0.00538089
Cth	protein_coding	ENSMUSG00000028179.12	23261.9	2.75926	0.0781449	35.3096	4.18607e-273	1.16207e-269
Slc22a18	protein_coding	ENSMUSG00000000154.16	1105.92	2.74339	0.120015	22.8586	1.19915e-115	1.09193e-112
Gjb2	protein_coding	ENSMUSG00000046352.7	53.4961	2.74093	0.43431	6.311	2.77231e-10	3.9582e-09
Krt8	protein_coding	ENSMUSG00000049382.10	7462.01	2.74072	0.082632	33.1678	3.14123e-241	7.72302e-238
Ubap1l	protein_coding	ENSMUSG00000086228.2	4081.4	2.63136	0.080019	32.8842	3.70292e-237	8.27637e-234
Peg10	protein_coding	ENSMUSG00000092035.8	5522.33	2.56648	0.443303	5.78945	7.06192e-09	8.51935e-08
Stc2	protein_coding	ENSMUSG00000020303.2	9771.26	2.55023	0.0722258	35.3091	4.25389e-273	1.16207e-269
Ido2	protein_coding	ENSMUSG00000031549.16	163.614	2.43478	0.263592	9.23691	2.53718e-20	8.98834e-19
Msln	protein_coding	ENSMUSG00000063011.6	122.737	2.42929	0.295716	8.21494	2.12267e-16	5.46472e-15
Krt18	protein_coding	ENSMUSG00000023043.7	833.902	2.35593	0.134633	17.4989	1.46023e-68	4.48766e-66
Itga8	protein_coding	ENSMUSG00000026768.10	316.362	2.31772	0.184612	12.5545	3.75489e-36	3.44469e-34
Adm2	protein_coding	ENSMUSG00000054136.6	1054.33	2.31696	0.133887	17.3053	4.28738e-67	1.25487e-64
Fgf21	protein_coding	ENSMUSG00000030827.5	15.9393	2.28897	0.729269	3.13871	0.00169691	0.00746337
Col26a1	protein_coding	ENSMUSG00000004415.15	1568.53	2.26602	0.104528	21.6785	3.27322e-104	2.43865e-101
Rrad	protein_coding	ENSMUSG00000031880.7	32.6981	2.2644	0.632136	3.58214	0.000340795	0.00180928
Crisp1	protein_coding	ENSMUSG00000025431.4	160.274	2.25611	0.29499	7.6481	2.03965e-14	4.46941e-13
Ces5a	protein_coding	ENSMUSG00000058019.13	25.4163	2.23618	0.690185	3.23997	0.00119541	0.00550382
Rasl12	protein_coding	ENSMUSG00000041696.14	24.7257	2.20229	0.696027	3.16409	0.00155567	0.00691014
Lamb3	protein_coding	ENSMUSG00000026639.18	163.572	2.19273	0.239316	9.16248	5.07202e-20	1.75388e-18
Grpr	protein_coding	ENSMUSG00000031364.2	26.7632	2.18963	0.595774	3.67527	0.000237599	0.00130831
RP24-297N9.3	protein_coding	ENSMUSG00000029564.12	31.1998	2.18179	0.617197	3.53501	0.000407767	0.00212672
Cntnap3	protein_coding	ENSMUSG00000033063.8	195.369	2.16298	0.223506	9.67748	3.75881e-22	1.5125e-20
Tmem179	protein_coding	ENSMUSG00000054013.6	892.7	2.15394	0.141886	15.1807	4.74412e-52	8.90373e-50
Abca1	protein_coding	ENSMUSG00000015243.4	5388.63	2.12028	0.111957	18.9384	5.50339e-80	2.14772e-77
Fam129a	protein_coding	ENSMUSG00000026483.13	12464.6	2.11529	0.0773357	27.3521	1.0203e-164	1.67235e-161
Cyb5r2	protein_coding	ENSMUSG00000048065.8	555.359	2.08837	0.155959	13.3905	6.87216e-41	7.93235e-39
Tmem59l	protein_coding	ENSMUSG00000035964.8	196.465	2.05804	0.243736	8.44372	3.0739e-17	8.37859e-16
Ano10	protein_coding	ENSMUSG00000037949.8	843.954	2.05053	0.134438	15.2526	1.58316e-52	2.99413e-50
Nme5	protein_coding	ENSMUSG00000035984.14	42.9529	2.03892	0.463904	4.39514	1.107e-05	8.07618e-05
Gng2	protein_coding	ENSMUSG00000043004.13	2229.28	2.0367	0.101807	20.0056	4.92353e-89	2.47041e-86
Nlrp4e	protein_coding	ENSMUSG00000045693.8	126.951	2.03362	0.377334	5.38944	7.06786e-08	7.45156e-07
Ddit4	protein_coding	ENSMUSG00000020108.4	5584.24	2.03062	0.0939502	21.6138	1.33263e-103	9.63645e-101
Mslnl	protein_coding	ENSMUSG00000041062.6	21.4929	2.00448	0.652643	3.07134	0.00213104	0.00908351
Gm6970	protein_coding	ENSMUSG00000091230.1	29.5325	2.00089	0.532919	3.75459	0.000173629	0.000985647
Panx2	protein_coding	ENSMUSG00000058441.7	44.4132	1.99351	0.547473	3.6413	0.000271266	0.00147161
Pon2	protein_coding	ENSMUSG00000032667.17	1563.08	1.96093	0.12683	15.4611	6.3499e-54	1.25902e-51
Ppp1r3g	protein_coding	ENSMUSG00000050423.11	81.6181	1.9601	0.346039	5.6644	1.47542e-08	1.72e-07
Arhgef5	protein_coding	ENSMUSG00000033542.13	929.956	1.9484	0.122667	15.8837	8.22159e-57	1.7577e-54
Herpud1	protein_coding	ENSMUSG00000031770.16	10935.8	1.94278	0.0801768	24.2312	1.0447e-129	1.07021e-126
Ndufa4l2	protein_coding	ENSMUSG00000040280.10	1642.77	1.94275	0.114638	16.9468	2.03201e-64	5.55099e-62
Atp2b3	protein_coding	ENSMUSG00000031376.15	43.9125	1.93942	0.445897	4.34948	1.36463e-05	9.76448e-05
Slco1b2	protein_coding	ENSMUSG00000030236.10	33.6359	1.93242	0.545653	3.54147	0.000397897	0.00208142
Bpifb5	protein_coding	ENSMUSG00000038572.7	122.688	1.9111	0.281257	6.79486	1.08417e-11	1.80837e-10
Serpinb1b	protein_coding	ENSMUSG00000051029.8	53.7091	1.88248	0.534206	3.52388	0.00042527	0.00220868
Tgfbr2	protein_coding	ENSMUSG00000032440.13	921.118	1.87372	0.130331	14.3766	7.25516e-47	1.08106e-44
Chac1	protein_coding	ENSMUSG00000027313.3	8827.28	1.86847	0.0953549	19.5949	1.70782e-85	7.77566e-83
Ube2dnl1	protein_coding	ENSMUSG00000050435.2	150.626	1.84355	0.287157	6.41999	1.36283e-10	2.00445e-09
Hsd17b1	protein_coding	ENSMUSG00000019301.5	263.625	1.82546	0.24147	7.55977	4.03782e-14	8.62501e-13
Ovgp1	protein_coding	ENSMUSG00000074340.9	145.438	1.81988	0.331615	5.48793	4.06662e-08	4.42202e-07
Tll1	protein_coding	ENSMUSG00000053626.5	842.698	1.80819	0.12334	14.6603	1.15757e-48	1.83613e-46
Tmem52	protein_coding	ENSMUSG00000023153.9	25.8407	1.80483	0.570863	3.16158	0.00156917	0.00696133
1600014C23Rik	protein_coding	ENSMUSG00000094690.1	52.3626	1.79761	0.536625	3.34983	0.000808603	0.00389842
Plaur	protein_coding	ENSMUSG00000046223.10	2559.24	1.78884	0.105718	16.9209	3.15772e-64	8.5314e-62
Fam84b	protein_coding	ENSMUSG00000072568.4	318.078	1.77441	0.201606	8.80138	1.35148e-18	4.20602e-17
Dpysl4	protein_coding	ENSMUSG00000025478.15	311.997	1.77325	0.177776	9.97465	1.96786e-23	8.63961e-22
Fam83h	protein_coding	ENSMUSG00000046761.12	3951.81	1.77309	0.0834926	21.2365	4.39654e-100	2.92144e-97
Spata31d1b	protein_coding	ENSMUSG00000091311.3	873.634	1.76797	0.136027	12.9972	1.26836e-38	1.32136e-36
Lrrc8e	protein_coding	ENSMUSG00000046589.7	198.934	1.76516	0.262689	6.71957	1.82263e-11	2.97354e-10
Mef2b	protein_coding	ENSMUSG00000079033.10	4217.92	1.75924	0.0845252	20.8132	3.28684e-96	1.97098e-93
Rem2	protein_coding	ENSMUSG00000022176.11	103.987	1.75054	0.280767	6.23484	4.52244e-10	6.29608e-09
Kbtbd11	protein_coding	ENSMUSG00000055675.6	3595.42	1.73597	0.0871462	19.9202	2.71683e-88	1.30972e-85
F3	protein_coding	ENSMUSG00000028128.13	512.501	1.72713	0.146079	11.8233	2.95758e-32	2.31577e-30
Ahsg	protein_coding	ENSMUSG00000022868.6	313.717	1.72581	0.178828	9.65066	4.8841e-22	1.95571e-20
Hexa	protein_coding	ENSMUSG00000025232.8	5738.2	1.725	0.0786024	21.9459	9.47818e-107	8.03554e-104
Sorbs3	protein_coding	ENSMUSG00000022091.6	648.101	1.7223	0.161447	10.6679	1.43836e-26	7.91131e-25
Pglyrp1	protein_coding	ENSMUSG00000030413.7	1888.46	1.71719	0.103774	16.5474	1.67188e-61	4.37286e-59
AC164564.3	protein_coding	ENSMUSG00000030587.5	687.105	1.70018	0.150818	11.2731	1.7822e-29	1.18425e-27
Dbn1	protein_coding	ENSMUSG00000034675.17	4520.59	1.69746	0.100657	16.8638	8.31301e-64	2.22156e-61
Pkdcc	protein_coding	ENSMUSG00000024247.14	301.258	1.69467	0.182421	9.28989	1.54453e-20	5.55172e-19
Ly6g5c	protein_coding	ENSMUSG00000034482.2	73.2486	1.69056	0.33617	5.02888	4.93363e-07	4.56523e-06
Fgfbp1	protein_coding	ENSMUSG00000048373.8	652.218	1.67209	0.181865	9.19413	3.78032e-20	1.31834e-18
Slc45a1	protein_coding	ENSMUSG00000039838.11	104.643	1.67177	0.30696	5.44621	5.14532e-08	5.52656e-07
Ahnak2	protein_coding	ENSMUSG00000072812.4	344.352	1.67099	0.185344	9.01563	1.95735e-19	6.47689e-18
Cib2	protein_coding	ENSMUSG00000037493.6	103.982	1.66824	0.306634	5.4405	5.31323e-08	5.69679e-07
S1pr3	protein_coding	ENSMUSG00000067586.4	123.32	1.66788	0.347781	4.79577	1.62048e-06	1.37744e-05
Ms4a18	protein_coding	ENSMUSG00000094584.2	151.819	1.66401	0.38769	4.29211	1.76981e-05	0.000124393
Tgm1	protein_coding	ENSMUSG00000022218.16	797.68	1.65351	0.144603	11.4349	2.7999e-30	1.93366e-28
Fam13c	protein_coding	ENSMUSG00000043259.15	729.024	1.65099	0.189495	8.71259	2.96999e-18	8.95953e-17
Zfp869	protein_coding	ENSMUSG00000054648.7	3153.03	1.6506	0.0960517	17.1845	3.47059e-66	9.80781e-64
Gstm7	protein_coding	ENSMUSG00000004035.12	141.17	1.64986	0.294507	5.60212	2.11745e-08	2.41128e-07
Crisp4	protein_coding	ENSMUSG00000025774.14	103.706	1.64565	0.367124	4.48253	7.37635e-06	5.575e-05
Atf5	protein_coding	ENSMUSG00000038539.15	6643.52	1.64358	0.127096	12.9318	2.97778e-38	3.02528e-36
Csmd2	protein_coding	ENSMUSG00000028804.20	1578.02	1.64301	0.124047	13.245	4.81992e-40	5.2903e-38
Nqo1	protein_coding	ENSMUSG00000003849.8	8463.67	1.62913	0.0991993	16.4228	1.31463e-60	3.36682e-58
Calcrl	protein_coding	ENSMUSG00000059588.13	36.4547	1.62798	0.492453	3.30585	0.000946875	0.0044838
Slc38a7	protein_coding	ENSMUSG00000036534.6	12054	1.62259	0.0724278	22.4029	3.68711e-111	3.23754e-108
Fstl3	protein_coding	ENSMUSG00000020325.10	46.5201	1.61955	0.418274	3.87198	0.000107956	0.000643443
Ap1m2	protein_coding	ENSMUSG00000003309.14	980.585	1.61904	0.125161	12.9357	2.83151e-38	2.88861e-36
RP24-87I22.6	protein_coding	ENSMUSG00000042510.7	108.411	1.61081	0.308516	5.22116	1.77804e-07	1.76809e-06
Irgc1	protein_coding	ENSMUSG00000062028.8	30.9708	1.61049	0.516312	3.11923	0.00181324	0.00790992
Igfbp6	protein_coding	ENSMUSG00000023046.6	33.3302	1.60053	0.48549	3.29672	0.000978201	0.00461702
Nsmf	protein_coding	ENSMUSG00000006476.19	219.485	1.58889	0.218601	7.26845	3.63644e-13	7.00671e-12
Sstr5	protein_coding	ENSMUSG00000050824.11	50.8646	1.57155	0.484224	3.24551	0.00117239	0.00540796
Anxa2	protein_coding	ENSMUSG00000032231.14	1802.63	1.57154	0.106053	14.8185	1.11276e-49	1.88678e-47
Unc13d	protein_coding	ENSMUSG00000057948.12	663.716	1.57122	0.128482	12.2292	2.17152e-34	1.8799e-32
Nr1h3	protein_coding	ENSMUSG00000002108.10	204.379	1.56453	0.228799	6.83805	8.02811e-12	1.35749e-10
Trib3	protein_coding	ENSMUSG00000032715.9	12910.2	1.56393	0.0884373	17.684	5.56569e-70	1.82451e-67
Fes	protein_coding	ENSMUSG00000053158.10	338.451	1.56296	0.173211	9.02348	1.8221e-19	6.05379e-18
Slc18a1	protein_coding	ENSMUSG00000036330.12	167.321	1.56245	0.232517	6.71973	1.82067e-11	2.97231e-10
Pdzd7	protein_coding	ENSMUSG00000074818.12	672.605	1.55675	0.152783	10.1893	2.2144e-24	1.04098e-22
Ankrd37	protein_coding	ENSMUSG00000050914.16	432.243	1.55294	0.212228	7.31732	2.5298e-13	4.95994e-12
Crb3	protein_coding	ENSMUSG00000044279.15	376.97	1.55291	0.181879	8.53813	1.36406e-17	3.84157e-16
Uap1l1	protein_coding	ENSMUSG00000026956.15	6537.03	1.54438	0.0750352	20.582	3.97594e-94	2.27331e-91
Lgals1	protein_coding	ENSMUSG00000068220.6	13826	1.54437	0.103526	14.9177	2.52733e-50	4.40688e-48
Hhip	protein_coding	ENSMUSG00000064325.4	650.795	1.53956	0.168896	9.11541	7.83737e-20	2.67253e-18
Cers1	protein_coding	ENSMUSG00000087408.10	459.652	1.53817	0.157879	9.74272	1.98179e-22	8.09375e-21
Hoxb4	protein_coding	ENSMUSG00000038692.8	46.8553	1.53715	0.483882	3.1767	0.00148962	0.00665404
Mrc1	protein_coding	ENSMUSG00000026712.3	193.181	1.53618	0.250098	6.14231	8.13305e-10	1.09687e-08
RP23-414K1.4	protein_coding	ENSMUSG00000033029.12	52.0053	1.53228	0.442382	3.46371	0.000532774	0.00270636
Atf3	protein_coding	ENSMUSG00000026628.13	1289.64	1.53201	0.118224	12.9586	2.10047e-38	2.16075e-36
Parp3	protein_coding	ENSMUSG00000023249.15	428.198	1.52457	0.163645	9.31632	1.20449e-20	4.37424e-19
Rlbp1	protein_coding	ENSMUSG00000039194.16	1487.74	1.52425	0.101739	14.9821	9.61783e-51	1.71351e-48
Fv1	protein_coding	ENSMUSG00000070583.1	137.29	1.51243	0.266158	5.68247	1.32764e-08	1.55806e-07
Tnk1	protein_coding	ENSMUSG00000001583.13	1236.93	1.51164	0.119239	12.6775	7.88323e-37	7.42594e-35
Npffr1	protein_coding	ENSMUSG00000020090.7	176.344	1.50899	0.248948	6.06146	1.34891e-09	1.77824e-08
Hpn	protein_coding	ENSMUSG00000001249.14	390.139	1.50582	0.168475	8.9379	3.96622e-19	1.28986e-17
Zmynd10	protein_coding	ENSMUSG00000010044.12	35.9775	1.50523	0.470581	3.19866	0.00138066	0.00624675
Cnksr1	protein_coding	ENSMUSG00000028841.14	117.766	1.50027	0.301464	4.97662	6.47025e-07	5.86137e-06
Olfml1	protein_coding	ENSMUSG00000051041.7	62.8521	1.49938	0.40759	3.67865	0.000234468	0.00129368
Hmox1	protein_coding	ENSMUSG00000005413.8	13208.2	1.49911	0.0779854	19.2229	2.38081e-82	1.00922e-79
Slc2a3	protein_coding	ENSMUSG00000003153.10	268494	1.49807	0.0686349	21.8266	1.29623e-105	1.02803e-102
Fcgr4	protein_coding	ENSMUSG00000059089.4	88.1901	1.49553	0.401746	3.72258	0.000197201	0.00110643
Bbs2	protein_coding	ENSMUSG00000031755.6	4340.32	1.49437	0.0763473	19.5733	2.61381e-85	1.16842e-82
Cebpb	protein_coding	ENSMUSG00000056501.3	250.396	1.49391	0.224089	6.66662	2.61763e-11	4.20359e-10
Sfmbt2	protein_coding	ENSMUSG00000061186.15	8667.62	1.49224	0.0916861	16.2755	1.47212e-59	3.54838e-57
RP23-249K18.3	protein_coding	ENSMUSG00000035085.5	100.839	1.48453	0.327502	4.53287	5.81863e-06	4.47752e-05
Gabre	protein_coding	ENSMUSG00000031340.8	196.853	1.47232	0.226879	6.48945	8.61527e-11	1.29709e-09
RP23-434P15.1	protein_coding	ENSMUSG00000051788.4	87.0644	1.46041	0.328825	4.44129	8.94211e-06	6.64001e-05
P2rx1	protein_coding	ENSMUSG00000020787.14	116.472	1.45901	0.359355	4.06008	4.90556e-05	0.000314904
Rnase4	protein_coding	ENSMUSG00000021876.15	194.804	1.45375	0.212677	6.83551	8.17166e-12	1.37892e-10
Zbtb42	protein_coding	ENSMUSG00000037638.5	151.159	1.44887	0.240407	6.02673	1.67313e-09	2.18885e-08
Dcaf12l1	protein_coding	ENSMUSG00000045284.9	6347.84	1.43724	0.0926023	15.5205	2.52023e-54	5.12085e-52
Fcrl5	protein_coding	ENSMUSG00000048031.15	896.589	1.43645	0.16499	8.70626	3.14075e-18	9.46305e-17
Sox7	protein_coding	ENSMUSG00000063060.6	594.132	1.43176	0.192856	7.42396	1.1367e-13	2.31541e-12
Foxa3	protein_coding	ENSMUSG00000040891.6	362.692	1.42919	0.17332	8.24593	1.63885e-16	4.23688e-15
Ctsc	protein_coding	ENSMUSG00000030560.17	5950.73	1.42629	0.0806655	17.6815	5.82315e-70	1.88379e-67
RP23-176J13.11	protein_coding	ENSMUSG00000057534.13	112.505	1.42254	0.321989	4.41796	9.96362e-06	7.35411e-05
Ikzf3	protein_coding	ENSMUSG00000018168.8	113.155	1.42075	0.353064	4.02405	5.72063e-05	0.000362681
Gpt2	protein_coding	ENSMUSG00000031700.11	28861	1.41968	0.0744917	19.0582	5.61522e-81	2.22671e-78
Dennd1c	protein_coding	ENSMUSG00000002668.7	110.282	1.41656	0.289047	4.9008	9.5445e-07	8.42287e-06
Fggy	protein_coding	ENSMUSG00000028573.18	792.22	1.41609	0.194438	7.28301	3.26456e-13	6.32986e-12
Adgrg1	protein_coding	ENSMUSG00000031785.16	469.983	1.41399	0.181711	7.78151	7.16628e-15	1.62238e-13
Patl2	protein_coding	ENSMUSG00000027233.4	559.593	1.41362	0.170122	8.30946	9.61362e-17	2.52522e-15
Lefty2	protein_coding	ENSMUSG00000066652.5	12196.1	1.41001	0.0897224	15.7153	1.18905e-55	2.47746e-53
Lexm	protein_coding	ENSMUSG00000054362.9	2181.13	1.39949	0.0878033	15.9389	3.40362e-57	7.34047e-55
Pck2	protein_coding	ENSMUSG00000040618.7	37984.7	1.39886	0.0793739	17.6237	1.61921e-69	5.03923e-67
Acnat1	protein_coding	ENSMUSG00000070985.3	116.226	1.39545	0.295145	4.72801	2.2673e-06	1.87123e-05
Prmt2	protein_coding	ENSMUSG00000020230.15	1033.42	1.39363	0.114684	12.1519	5.6043e-34	4.73496e-32
Mme	protein_coding	ENSMUSG00000027820.12	7579.05	1.38623	0.0941501	14.7236	4.54641e-49	7.40252e-47
Eppk1	protein_coding	ENSMUSG00000115388.2	1598.71	1.38033	0.412773	3.34403	0.000825705	0.00396965
Atf4	protein_coding	ENSMUSG00000042406.8	32279.3	1.3786	0.0920287	14.9801	9.90547e-51	1.75206e-48
Aspg	protein_coding	ENSMUSG00000037686.6	1517.68	1.37634	0.102415	13.4389	3.57765e-41	4.20862e-39
Fetub	protein_coding	ENSMUSG00000022871.13	5241.83	1.37355	0.0840901	16.3342	5.63645e-60	1.41406e-57
Reep6	protein_coding	ENSMUSG00000035504.16	3566.54	1.37196	0.123909	11.0723	1.70871e-28	1.07169e-26
Tsc22d3	protein_coding	ENSMUSG00000031431.13	1073.44	1.36135	0.111814	12.1751	4.21733e-34	3.58779e-32
Rax	protein_coding	ENSMUSG00000024517.16	532.932	1.35724	0.168501	8.05481	7.96028e-16	1.95321e-14
Entpd3	protein_coding	ENSMUSG00000041608.8	270.708	1.35336	0.217327	6.2273	4.74555e-10	6.58136e-09
Acss2	protein_coding	ENSMUSG00000027605.18	3559.67	1.3527	0.0976534	13.852	1.23672e-43	1.61734e-41
Bnip3	protein_coding	ENSMUSG00000078566.8	2741.22	1.35141	0.0995374	13.5769	5.4879e-42	6.67947e-40
Pcsk9	protein_coding	ENSMUSG00000044254.6	4249.07	1.3501	0.0988627	13.6564	1.85001e-42	2.29719e-40
Syde1	protein_coding	ENSMUSG00000032714.6	817.202	1.34803	0.143151	9.41685	4.64833e-21	1.75551e-19
S100a13	protein_coding	ENSMUSG00000042312.9	306.945	1.34611	0.183089	7.35225	1.94896e-13	3.8674e-12
Grm4	protein_coding	ENSMUSG00000063239.17	637.75	1.34064	0.154924	8.65352	4.99346e-18	1.47663e-16
Iah1	protein_coding	ENSMUSG00000062054.7	7046.47	1.33836	0.0896793	14.9239	2.30402e-50	4.04618e-48
Cd59a	protein_coding	ENSMUSG00000032679.12	645.246	1.3298	0.154781	8.59147	8.58629e-18	2.47483e-16
Irf6	protein_coding	ENSMUSG00000026638.15	631.303	1.32868	0.144087	9.22143	2.93151e-20	1.03555e-18
AC132837.2	protein_coding	ENSMUSG00000073598.3	277.944	1.32528	0.193239	6.85822	6.97222e-12	1.18465e-10
Tns2	protein_coding	ENSMUSG00000037003.16	1407.94	1.32271	0.134924	9.8034	1.08855e-22	4.52843e-21
Ltbr	protein_coding	ENSMUSG00000030339.7	1195.25	1.32247	0.126755	10.4333	1.74699e-25	8.85598e-24
Rtp2	protein_coding	ENSMUSG00000047531.9	209.441	1.32158	0.232613	5.68146	1.33547e-08	1.56576e-07
Col11a1	protein_coding	ENSMUSG00000027966.20	517.282	1.30749	0.148706	8.79244	1.46345e-18	4.52014e-17
Hapln4	protein_coding	ENSMUSG00000007594.10	147.524	1.30453	0.277205	4.706	2.52623e-06	2.07379e-05
Pklr	protein_coding	ENSMUSG00000041237.12	128.326	1.30372	0.329357	3.95839	7.54577e-05	0.000466014
Fh1	protein_coding	ENSMUSG00000026526.14	19838.6	1.30344	0.0890671	14.6343	1.69712e-48	2.67471e-46
Jdp2	protein_coding	ENSMUSG00000034271.16	6801.65	1.29968	0.0813407	15.9782	1.81357e-57	4.01697e-55
Myl4	protein_coding	ENSMUSG00000061086.12	1415.65	1.29832	0.156376	8.30256	1.0189e-16	2.66497e-15
Otub2	protein_coding	ENSMUSG00000021203.15	2584.17	1.29821	0.0905944	14.3299	1.42276e-46	2.05765e-44
Cish	protein_coding	ENSMUSG00000032578.7	122.961	1.29368	0.293921	4.40147	1.07522e-05	7.87002e-05
Gdf15	protein_coding	ENSMUSG00000038508.7	2285.03	1.29358	0.0991419	13.0477	6.54539e-39	6.90665e-37
Stac3	protein_coding	ENSMUSG00000040287.9	64.8447	1.28803	0.353996	3.63853	0.0002742	0.00148655
Arl2bp	protein_coding	ENSMUSG00000031776.17	8504.01	1.28673	0.0794477	16.196	5.38144e-59	1.27219e-56
Psph	protein_coding	ENSMUSG00000029446.14	19202.9	1.2859	0.101556	12.662	9.60274e-37	9.01118e-35
Gjb5	protein_coding	ENSMUSG00000042357.2	4524.06	1.28587	0.0933376	13.7766	3.52586e-43	4.51494e-41
Vmn2r97	protein_coding	ENSMUSG00000091491.2	115.411	1.28563	0.329923	3.89675	9.74904e-05	0.000587188
Ufsp2	protein_coding	ENSMUSG00000031634.13	2198.12	1.28297	0.117968	10.8756	1.50609e-27	8.90111e-26
Mdga2	protein_coding	ENSMUSG00000034912.17	727.817	1.28285	0.171991	7.45884	8.72898e-14	1.79892e-12
Gpr27	protein_coding	ENSMUSG00000072875.2	355.727	1.28143	0.194282	6.59572	4.23211e-11	6.64435e-10
Pou4f2	protein_coding	ENSMUSG00000031688.4	2679.62	1.28033	0.0913231	14.0198	1.18024e-44	1.62108e-42
Cldn19	protein_coding	ENSMUSG00000066058.11	246.025	1.28019	0.186506	6.86409	6.6917e-12	1.14014e-10
Mmp28	protein_coding	ENSMUSG00000020682.17	819.361	1.27934	0.128658	9.94372	2.6861e-23	1.16473e-21
Osbpl5	protein_coding	ENSMUSG00000037606.18	193.388	1.279	0.207298	6.16986	6.835e-10	9.32549e-09
Sgsh	protein_coding	ENSMUSG00000005043.13	483.694	1.27509	0.155382	8.2062	2.28305e-16	5.85309e-15
Foxn1	protein_coding	ENSMUSG00000002057.4	140.259	1.27329	0.245351	5.18965	2.10691e-07	2.06706e-06
RP24-553G19.5	protein_coding	ENSMUSG00000052334.11	179.944	1.26899	0.272553	4.65594	3.22502e-06	2.60053e-05
Tspan32	protein_coding	ENSMUSG00000000244.17	273.407	1.26748	0.185481	6.83345	8.2897e-12	1.39788e-10
Car2	protein_coding	ENSMUSG00000027562.12	16600	1.26536	0.0949732	13.3233	1.69471e-40	1.92898e-38
Arhgef16	protein_coding	ENSMUSG00000029032.12	327.703	1.26001	0.195641	6.44044	1.19129e-10	1.76122e-09
Mroh4	protein_coding	ENSMUSG00000022603.9	535.725	1.25847	0.168182	7.48276	7.27775e-14	1.51765e-12
Ttc22	protein_coding	ENSMUSG00000034919.2	127.584	1.25601	0.267416	4.69685	2.64205e-06	2.16371e-05
Zmat4	protein_coding	ENSMUSG00000037492.16	1316.07	1.25454	0.109652	11.4411	2.60564e-30	1.80967e-28
Gstm5	protein_coding	ENSMUSG00000004032.10	136.125	1.25397	0.247111	5.07453	3.88453e-07	3.6592e-06
Slc35a2	protein_coding	ENSMUSG00000031156.18	3495.87	1.24953	0.087112	14.344	1.16238e-46	1.69102e-44
Bex1	protein_coding	ENSMUSG00000050071.8	17874.5	1.24646	0.098577	12.6445	1.19976e-36	1.12157e-34
Srrm4	protein_coding	ENSMUSG00000063919.11	209.32	1.24643	0.266687	4.67374	2.95757e-06	2.39666e-05
Pkp2	protein_coding	ENSMUSG00000041957.15	3005.14	1.24342	0.0924143	13.4548	2.88446e-41	3.40948e-39
Tinagl1	protein_coding	ENSMUSG00000028776.14	1312.74	1.24317	0.116744	10.6487	1.76861e-26	9.62016e-25
Pi16	protein_coding	ENSMUSG00000024011.16	89.4304	1.24134	0.305549	4.06264	4.85203e-05	0.000311874
Xkr7	protein_coding	ENSMUSG00000042631.7	223.007	1.24045	0.275442	4.5035	6.68426e-06	5.08633e-05
Cby3	protein_coding	ENSMUSG00000050087.3	534.348	1.23935	0.151439	8.18387	2.74881e-16	6.97443e-15
Amfr	protein_coding	ENSMUSG00000031751.14	9939.17	1.23882	0.0833802	14.8575	6.21946e-50	1.06189e-47
RP24-443B5.2	protein_coding	ENSMUSG00000078580.3	971.089	1.23791	0.128863	9.60643	7.51056e-22	2.95921e-20
Gata1	protein_coding	ENSMUSG00000031162.14	133.182	1.23487	0.293524	4.20706	2.58714e-05	0.000176247
F12	protein_coding	ENSMUSG00000021492.15	72.8565	1.2322	0.35362	3.48453	0.000492998	0.0025236
Slitrk5	protein_coding	ENSMUSG00000033214.10	618.72	1.23194	0.133961	9.19626	3.70629e-20	1.29436e-18
Tmem189	protein_coding	ENSMUSG00000090213.1	354.157	1.23161	0.178979	6.88132	5.93019e-12	1.01815e-10
Slc41a3	protein_coding	ENSMUSG00000030089.15	537.301	1.2287	0.149943	8.19444	2.51761e-16	6.40103e-15
Cmtm3	protein_coding	ENSMUSG00000031875.7	1322.35	1.2255	0.121376	10.0967	5.71222e-24	2.61528e-22
Irx2	protein_coding	ENSMUSG00000001504.10	2535.63	1.2249	0.0962744	12.723	4.40594e-37	4.21496e-35
Olfr985	protein_coding	ENSMUSG00000049073.7	265.54	1.21994	0.203595	5.99199	2.07286e-09	2.66684e-08
Cdc42ep1	protein_coding	ENSMUSG00000049521.2	215.409	1.21416	0.251232	4.83281	1.34621e-06	1.15808e-05
Tlr4	protein_coding	ENSMUSG00000039005.13	3562.76	1.21391	0.089364	13.5839	4.98936e-42	6.13342e-40
Inf2	protein_coding	ENSMUSG00000037679.9	2007.38	1.21308	0.134851	8.9957	2.34736e-19	7.75701e-18
Glod5	protein_coding	ENSMUSG00000031163.2	364.035	1.21072	0.187993	6.44025	1.1928e-10	1.76238e-09
Scarf2	protein_coding	ENSMUSG00000012017.4	296.093	1.20991	0.221472	5.46306	4.68009e-08	5.05779e-07
Wnt6	protein_coding	ENSMUSG00000033227.7	596.514	1.20928	0.131081	9.22544	2.82406e-20	9.99025e-19
Wnt8a	protein_coding	ENSMUSG00000012282.2	160.275	1.20918	0.261451	4.6249	3.74786e-06	2.97914e-05
Fndc4	protein_coding	ENSMUSG00000038552.14	1695.34	1.20583	0.112129	10.7539	5.68102e-27	3.2634e-25
Meis3	protein_coding	ENSMUSG00000041420.18	441.116	1.20536	0.186491	6.46334	1.02416e-10	1.52698e-09
Ckmt1	protein_coding	ENSMUSG00000000308.14	4689.99	1.20531	0.0901625	13.3682	9.28166e-41	1.06635e-38
Acsl6	protein_coding	ENSMUSG00000020333.17	836.782	1.20511	0.14279	8.43975	3.18024e-17	8.64926e-16
Gys1	protein_coding	ENSMUSG00000003865.16	15434.2	1.20428	0.069512	17.3248	3.05554e-67	9.1614e-65
Syce2	protein_coding	ENSMUSG00000003824.12	8346.03	1.20325	0.0817049	14.7267	4.34105e-49	7.16303e-47
Kbtbd13	protein_coding	ENSMUSG00000054978.3	84.6932	1.20257	0.321537	3.74006	0.00018398	0.00103985
Cdkn2a	protein_coding	ENSMUSG00000044303.6	928.484	1.20007	0.120509	9.95837	2.31832e-23	1.00882e-21
Lgals3	protein_coding	ENSMUSG00000050335.17	6744.82	1.19589	0.0832912	14.358	9.49721e-47	1.39819e-44
Osmr	protein_coding	ENSMUSG00000022146.12	64.401	1.19196	0.354363	3.36368	0.00076912	0.00373014
Cited1	protein_coding	ENSMUSG00000051159.16	150.737	1.18827	0.277147	4.28751	1.80687e-05	0.000126816
Klhl14	protein_coding	ENSMUSG00000042514.11	109.602	1.18352	0.290892	4.06857	4.73019e-05	0.0003046
Anxa5	protein_coding	ENSMUSG00000027712.13	1833.12	1.1829	0.0941208	12.5678	3.17274e-36	2.92154e-34
Zfp963	protein_coding	ENSMUSG00000092260.7	338.553	1.18266	0.174064	6.7944	1.08763e-11	1.81264e-10
Ldhd	protein_coding	ENSMUSG00000031958.16	619.653	1.17929	0.147534	7.99334	1.3133e-15	3.15319e-14
Lefty1	protein_coding	ENSMUSG00000038793.8	3655.72	1.1774	0.0852335	13.8138	2.10372e-43	2.73661e-41
Ints7	protein_coding	ENSMUSG00000037461.10	26712.2	1.17645	0.0672924	17.4827	1.94024e-68	5.88922e-66
Lpin3	protein_coding	ENSMUSG00000027412.12	1421.46	1.17501	0.103075	11.3997	4.19798e-30	2.87498e-28
Dnase2a	protein_coding	ENSMUSG00000003812.13	6537.91	1.17329	0.0718545	16.3287	6.1643e-60	1.53086e-57
AC074335.4	protein_coding	ENSMUSG00000049357.11	135.755	1.17297	0.249698	4.69755	2.63303e-06	2.15714e-05
Crym	protein_coding	ENSMUSG00000030905.5	173.903	1.17049	0.241676	4.84321	1.27757e-06	1.10211e-05
Homer3	protein_coding	ENSMUSG00000003573.15	4012.29	1.16549	0.100424	11.6057	3.85581e-31	2.8047e-29
Rsph3a	protein_coding	ENSMUSG00000073471.3	599.569	1.16531	0.165953	7.02194	2.18809e-12	3.87861e-11
Pcbd1	protein_coding	ENSMUSG00000020098.7	450.942	1.16531	0.168622	6.91079	4.81975e-12	8.2982e-11
Il27ra	protein_coding	ENSMUSG00000005465.9	946.906	1.16234	0.126251	9.20662	3.36552e-20	1.18207e-18
Emp2	protein_coding	ENSMUSG00000022505.9	852.927	1.16198	0.128582	9.03686	1.61232e-19	5.37862e-18
Hook2	protein_coding	ENSMUSG00000052566.8	13439.7	1.16153	0.0757135	15.3411	4.06344e-53	7.80498e-51
Mst1	protein_coding	ENSMUSG00000032591.15	727.73	1.15583	0.121602	9.50507	1.99914e-21	7.66783e-20
Kcnf1	protein_coding	ENSMUSG00000051726.6	294.537	1.15183	0.208269	5.53048	3.19358e-08	3.5448e-07
Grina	protein_coding	ENSMUSG00000022564.7	2064.85	1.14997	0.109243	10.5267	6.5105e-26	3.36984e-24
Serpinh1	protein_coding	ENSMUSG00000070436.12	36183.3	1.1493	0.0947829	12.1256	7.72608e-34	6.48305e-32
RP23-158M12.2	protein_coding	ENSMUSG00000081044.8	122.203	1.14875	0.306784	3.74449	0.000180759	0.00102305
Fosl2	protein_coding	ENSMUSG00000029135.10	206.174	1.14716	0.220978	5.19129	2.08847e-07	2.05142e-06
Adgrd1	protein_coding	ENSMUSG00000044017.16	4972.67	1.14712	0.0744142	15.4153	1.29175e-53	2.52055e-51
Lpar2	protein_coding	ENSMUSG00000031861.15	1354.25	1.14618	0.130879	8.75756	1.99522e-18	6.1013e-17
Ctgf	protein_coding	ENSMUSG00000019997.11	514.246	1.14523	0.169522	6.75563	1.42221e-11	2.34045e-10
Amotl2	protein_coding	ENSMUSG00000032531.15	11953.1	1.14404	0.072974	15.6774	2.15829e-55	4.45914e-53
Parvg	protein_coding	ENSMUSG00000022439.9	234.472	1.14305	0.219599	5.20514	1.93849e-07	1.9179e-06
Mgat4c	protein_coding	ENSMUSG00000019888.16	507.738	1.14256	0.164571	6.94263	3.84865e-12	6.6966e-11
Pyroxd1	protein_coding	ENSMUSG00000041671.13	520.256	1.14188	0.154502	7.39071	1.46048e-13	2.93122e-12
Nupr1	protein_coding	ENSMUSG00000030717.9	6056.47	1.1394	0.105889	10.7603	5.30131e-27	3.05241e-25
Tom1l1	protein_coding	ENSMUSG00000020541.12	5328.14	1.1377	0.0772353	14.7303	4.11606e-49	6.83767e-47
Hspb8	protein_coding	ENSMUSG00000041548.4	2744.65	1.13737	0.107708	10.5597	4.58175e-26	2.40185e-24
Id1	protein_coding	ENSMUSG00000042745.9	10437.2	1.13718	0.101817	11.1689	5.78769e-29	3.72503e-27
Abhd5	protein_coding	ENSMUSG00000032540.16	1734.1	1.13444	0.110713	10.2467	1.2246e-24	5.88049e-23
Nrbp2	protein_coding	ENSMUSG00000075590.4	587.194	1.13238	0.158319	7.15254	8.51879e-13	1.57713e-11
Uchl5	protein_coding	ENSMUSG00000018189.12	10002	1.13195	0.0745992	15.1737	5.28052e-52	9.83537e-50
Trim66	protein_coding	ENSMUSG00000031026.15	218.53	1.12982	0.210841	5.35863	8.38558e-08	8.73223e-07
Pnmal2	protein_coding	ENSMUSG00000070802.5	370.913	1.12944	0.174132	6.48616	8.80533e-11	1.32408e-09
Hbegf	protein_coding	ENSMUSG00000024486.5	6404.1	1.12891	0.0935184	12.0715	1.49418e-33	1.23817e-31
Gmip	protein_coding	ENSMUSG00000036246.14	738.429	1.12432	0.141378	7.95257	1.82678e-15	4.33526e-14
Col7a1	protein_coding	ENSMUSG00000025650.13	723.424	1.12243	0.144276	7.77976	7.26647e-15	1.64355e-13
Gstm6	protein_coding	ENSMUSG00000068762.11	96.8966	1.11954	0.288081	3.88622	0.000101817	0.000609219
Cd82	protein_coding	ENSMUSG00000027215.13	84.6906	1.11732	0.330689	3.37876	0.000728126	0.0035604
Lmna	protein_coding	ENSMUSG00000028063.15	8873.26	1.11569	0.0759033	14.6988	6.56198e-49	1.05188e-46
Fmn2	protein_coding	ENSMUSG00000028354.13	1067.1	1.11301	0.192816	5.77241	7.81473e-09	9.38149e-08
AC117750.1	protein_coding	ENSMUSG00000031620.16	2462.27	1.11246	0.111888	9.94261	2.71617e-23	1.1757e-21
Ctsl	protein_coding	ENSMUSG00000021477.9	29691.4	1.11231	0.0943568	11.7884	4.48092e-32	3.47533e-30
Ssh3	protein_coding	ENSMUSG00000034616.16	858.602	1.11196	0.123826	8.98007	2.70595e-19	8.90609e-18
Glipr2	protein_coding	ENSMUSG00000028480.14	6525.23	1.11172	0.103161	10.7765	4.44496e-27	2.57139e-25
Msh4	protein_coding	ENSMUSG00000005493.15	1656.51	1.10827	0.113409	9.77233	1.48008e-22	6.10557e-21
Sema3b	protein_coding	ENSMUSG00000057969.15	2102.98	1.10335	0.0929737	11.8673	1.74969e-32	1.39217e-30
Wdr64	protein_coding	ENSMUSG00000026523.14	268.634	1.10297	0.207266	5.32153	1.02899e-07	1.06074e-06
Bche	protein_coding	ENSMUSG00000027792.11	303.145	1.09871	0.211072	5.20537	1.9361e-07	1.9163e-06
Ptprn	protein_coding	ENSMUSG00000026204.15	219.375	1.09855	0.217074	5.06073	4.17653e-07	3.91327e-06
Zfp516	protein_coding	ENSMUSG00000058881.12	11416	1.09701	0.0794787	13.8026	2.45973e-43	3.18289e-41
Ptgr1	protein_coding	ENSMUSG00000028378.6	5064.51	1.0967	0.101284	10.8279	2.53829e-27	1.48906e-25
Bspry	protein_coding	ENSMUSG00000028392.15	634.008	1.09489	0.147558	7.42005	1.17072e-13	2.37682e-12
Pkia	protein_coding	ENSMUSG00000027499.12	375.534	1.0947	0.179515	6.09806	1.07362e-09	1.42991e-08
Prrx2	protein_coding	ENSMUSG00000039476.13	1204.14	1.09464	0.107397	10.1925	2.14117e-24	1.00935e-22
Zbtb10	protein_coding	ENSMUSG00000069114.8	4761.02	1.09373	0.0889416	12.2972	9.38057e-35	8.29606e-33
Dleu7	protein_coding	ENSMUSG00000048281.9	302.185	1.09157	0.20064	5.44042	5.3154e-08	5.69679e-07
Prss8	protein_coding	ENSMUSG00000030800.10	579.167	1.09044	0.148766	7.32992	2.30295e-13	4.54781e-12
Anxa3	protein_coding	ENSMUSG00000029484.12	135.845	1.08445	0.322818	3.35934	0.000781286	0.00378273
Samd9l	protein_coding	ENSMUSG00000047735.14	2052.93	1.08297	0.0959967	11.2813	1.62263e-29	1.08703e-27
Rgs3	protein_coding	ENSMUSG00000059810.18	3174.24	1.0819	0.106254	10.1822	2.38073e-24	1.11279e-22
Daam2	protein_coding	ENSMUSG00000040260.8	149.133	1.08115	0.273322	3.95558	7.63499e-05	0.000470461
Sat1	protein_coding	ENSMUSG00000025283.15	8339.8	1.07831	0.0916533	11.7651	5.90331e-32	4.53559e-30
Cemip	protein_coding	ENSMUSG00000052353.13	504.02	1.07735	0.167353	6.43757	1.21401e-10	1.79157e-09
Tjp3	protein_coding	ENSMUSG00000034917.8	2613.74	1.07664	0.0876159	12.2882	1.04822e-34	9.17138e-33
Slc38a8	protein_coding	ENSMUSG00000034224.14	748.154	1.07346	0.162447	6.60807	3.8937e-11	6.14444e-10
H2-Ab1	protein_coding	ENSMUSG00000073421.5	215.394	1.06997	0.20839	5.13448	2.82922e-07	2.71716e-06
Naglu	protein_coding	ENSMUSG00000001751.9	585.734	1.06717	0.136321	7.82833	4.94377e-15	1.13915e-13
Pgk1	protein_coding	ENSMUSG00000062070.12	151250	1.06685	0.0800527	13.3268	1.61581e-40	1.84773e-38
Mapk13	protein_coding	ENSMUSG00000004864.12	1131.2	1.06538	0.106829	9.97277	2.00553e-23	8.78932e-22
Dtl	protein_coding	ENSMUSG00000037474.13	20713.5	1.06468	0.0736352	14.4589	2.20413e-47	3.34511e-45
Ina	protein_coding	ENSMUSG00000034336.3	1634.05	1.06158	0.118192	8.98185	2.66243e-19	8.77461e-18
Suv39h1	protein_coding	ENSMUSG00000039231.18	134.94	1.05993	0.267795	3.95798	7.55871e-05	0.000466696
Dand5	protein_coding	ENSMUSG00000053226.6	402.455	1.05839	0.173685	6.09375	1.10295e-09	1.46579e-08
Slc39a2	protein_coding	ENSMUSG00000072572.9	86.1713	1.05454	0.329387	3.20151	0.00136709	0.00618993
Gstm1	protein_coding	ENSMUSG00000058135.12	2675.06	1.05412	0.0953031	11.0607	1.94503e-28	1.21372e-26
Pou2f3	protein_coding	ENSMUSG00000032015.16	1882.88	1.05239	0.104508	10.0699	7.50236e-24	3.39068e-22
Cdnf	protein_coding	ENSMUSG00000039496.8	124.563	1.05084	0.303445	3.46304	0.0005341	0.00271141
Amhr2	protein_coding	ENSMUSG00000023047.11	1720.1	1.04993	0.105771	9.92646	3.19379e-23	1.37759e-21
Exo1	protein_coding	ENSMUSG00000039748.11	26196.2	1.04909	0.0797243	13.1589	1.51193e-39	1.61618e-37
S100a10	protein_coding	ENSMUSG00000041959.14	11247.7	1.04761	0.102783	10.1924	2.14302e-24	1.00935e-22
Steap1	protein_coding	ENSMUSG00000015652.9	2621.82	1.04655	0.102253	10.2349	1.38345e-24	6.63031e-23
Phf19	protein_coding	ENSMUSG00000026873.9	336.274	1.04492	0.173823	6.01136	1.8397e-09	2.38811e-08
Slc16a3	protein_coding	ENSMUSG00000025161.16	17828.2	1.04407	0.0705403	14.8011	1.44137e-49	2.42723e-47
Cep170b	protein_coding	ENSMUSG00000072825.11	8418.74	1.04228	0.0944576	11.0344	2.60749e-28	1.60671e-26
Npdc1	protein_coding	ENSMUSG00000015094.16	1445.83	1.03847	0.103625	10.0214	1.22719e-23	5.47579e-22
Zfp579	protein_coding	ENSMUSG00000051550.10	188.972	1.03622	0.228713	4.53065	5.88026e-06	4.51787e-05
Fignl2	protein_coding	ENSMUSG00000095440.2	5126.48	1.03282	0.0778722	13.263	3.79541e-40	4.22235e-38
Tpm4	protein_coding	ENSMUSG00000031799.9	4639.57	1.03102	0.096476	10.6868	1.17385e-26	6.50005e-25
Gm10638	protein_coding	ENSMUSG00000074178.2	124.635	1.03086	0.305119	3.37855	0.000728703	0.00356252
Evpl	protein_coding	ENSMUSG00000034282.3	1053.56	1.02947	0.123803	8.31539	9.14499e-17	2.40469e-15
Prph	protein_coding	ENSMUSG00000023484.14	4527.43	1.02871	0.109723	9.37553	6.88279e-21	2.55234e-19
Sox8	protein_coding	ENSMUSG00000024176.10	189.309	1.02838	0.223134	4.60878	4.05047e-06	3.19592e-05
RP23-362N19.4	protein_coding	ENSMUSG00000026809.15	78.1585	1.02631	0.313987	3.26862	0.00108072	0.00502752
Misp	protein_coding	ENSMUSG00000035852.11	538.866	1.02588	0.166863	6.14804	7.84455e-10	1.06204e-08
Gstm4	protein_coding	ENSMUSG00000027890.17	511.808	1.02476	0.170131	6.02336	1.70832e-09	2.23171e-08
Pim2	protein_coding	ENSMUSG00000031155.16	2147.08	1.0246	0.129066	7.93856	2.04548e-15	4.84025e-14
Pfkl	protein_coding	ENSMUSG00000020277.10	79140.8	1.02438	0.0744152	13.7658	4.0945e-43	5.18905e-41
Sat2	protein_coding	ENSMUSG00000069835.10	223.445	1.02377	0.247392	4.13824	3.49984e-05	0.000231371
Stx3	protein_coding	ENSMUSG00000041488.16	5220.37	1.02047	0.0753593	13.5415	8.90107e-42	1.07275e-39
Vps53	protein_coding	ENSMUSG00000017288.15	3882.62	1.02028	0.0907426	11.2437	2.48815e-29	1.64004e-27
Pla2g4e	protein_coding	ENSMUSG00000050211.14	2035.46	1.02013	0.100442	10.1564	3.10266e-24	1.43928e-22
Nes	protein_coding	ENSMUSG00000004891.16	9409.32	1.01961	0.0960612	10.6141	2.56136e-26	1.381e-24
Cpne2	protein_coding	ENSMUSG00000034361.10	287.283	1.01721	0.191702	5.30623	1.11918e-07	1.14746e-06
Shisa4	protein_coding	ENSMUSG00000041889.7	209.986	1.01378	0.200653	5.05239	4.36327e-07	4.07581e-06
Inadl	protein_coding	ENSMUSG00000061859.16	496.257	1.01283	0.177295	5.71269	1.11205e-08	1.3151e-07
Gldc	protein_coding	ENSMUSG00000024827.9	37070.1	1.01181	0.067972	14.8856	4.08577e-50	7.02466e-48
Trim56	protein_coding	ENSMUSG00000043279.9	2314.4	1.0106	0.0882286	11.4544	2.23531e-30	1.56129e-28
Tpi1	protein_coding	ENSMUSG00000023456.15	116739	1.01021	0.0833141	12.1253	7.75917e-34	6.48867e-32
S100a11	protein_coding	ENSMUSG00000027907.4	914.1	1.00932	0.163393	6.17727	6.52199e-10	8.91823e-09
Map1b	protein_coding	ENSMUSG00000052727.6	17852.2	1.00918	0.110005	9.17391	4.56173e-20	1.58187e-18
Nfkb2	protein_coding	ENSMUSG00000025225.14	2578.06	1.00902	0.0904926	11.1503	7.13819e-29	4.55843e-27
Palm3	protein_coding	ENSMUSG00000047986.12	7180.31	1.00851	0.146693	6.87495	6.20131e-12	1.061e-10
Plec	protein_coding	ENSMUSG00000022565.15	35893.4	1.00648	0.0930379	10.818	2.8301e-27	1.65275e-25
Mdga1	protein_coding	ENSMUSG00000043557.15	3579.33	1.00641	0.0931392	10.8055	3.24322e-27	1.88952e-25
Eno2	protein_coding	ENSMUSG00000004267.16	982.456	1.00459	0.121591	8.26207	1.43162e-16	3.71285e-15
Sh2d3c	protein_coding	ENSMUSG00000059013.12	272.609	1.00439	0.202318	4.96443	6.89038e-07	6.21481e-06
Gramd4	protein_coding	ENSMUSG00000035900.18	2236.64	1.00408	0.0939452	10.688	1.15872e-26	6.43077e-25
Ddit3	protein_coding	ENSMUSG00000025408.15	1871.1	1.00269	0.0945404	10.606	2.79596e-26	1.50419e-24
Mei4	protein_coding	ENSMUSG00000043289.12	1375.98	0.997254	0.133988	7.44285	9.85382e-14	2.01552e-12
Prss16	protein_coding	ENSMUSG00000006179.9	720.397	0.995853	0.164543	6.05224	1.42848e-09	1.8781e-08
Cdx2	protein_coding	ENSMUSG00000029646.3	143.158	0.992788	0.256241	3.87443	0.000106877	0.000637319
Scarb2	protein_coding	ENSMUSG00000029426.8	8005.84	0.992138	0.071513	13.8735	9.16639e-44	1.20516e-41
Il12rb1	protein_coding	ENSMUSG00000000791.9	505.155	0.991814	0.140483	7.06001	1.66486e-12	2.97905e-11
Bhlhe40	protein_coding	ENSMUSG00000030103.11	3835.49	0.991744	0.0929095	10.6743	1.34259e-26	7.40109e-25
Slc8a3	protein_coding	ENSMUSG00000079055.10	400.242	0.991651	0.160734	6.16951	6.85005e-10	9.34084e-09
Copz2	protein_coding	ENSMUSG00000018672.15	205.672	0.991562	0.201807	4.91342	8.95026e-07	7.92121e-06
Ddah1	protein_coding	ENSMUSG00000028194.15	4484.35	0.990573	0.0923234	10.7294	7.40903e-27	4.18755e-25
Higd1a	protein_coding	ENSMUSG00000038412.8	15307.1	0.990171	0.0925414	10.6998	1.02047e-26	5.71509e-25
Tmprss11d	protein_coding	ENSMUSG00000061259.11	410.509	0.989543	0.151849	6.51663	7.1906e-11	1.09466e-09
Zfp319	protein_coding	ENSMUSG00000046556.7	2214.25	0.988086	0.112199	8.80655	1.2906e-18	4.02672e-17
Dnmt3l	protein_coding	ENSMUSG00000000730.13	8715.55	0.986889	0.0860628	11.4671	1.93067e-30	1.35621e-28
Gm10643	protein_coding	ENSMUSG00000074215.2	126.914	0.985133	0.311674	3.16078	0.00157345	0.00697531
P2ry6	protein_coding	ENSMUSG00000048779.5	128.22	0.984057	0.255127	3.85713	0.000114727	0.000678699
Phgdh	protein_coding	ENSMUSG00000053398.11	66763.4	0.982757	0.0897755	10.9468	6.88081e-28	4.1161e-26
Usb1	protein_coding	ENSMUSG00000031792.15	7515.69	0.981128	0.0857837	11.4372	2.72436e-30	1.88679e-28
Rln3	protein_coding	ENSMUSG00000045232.4	437.372	0.980438	0.143933	6.81176	9.64132e-12	1.61914e-10
Blvrb	protein_coding	ENSMUSG00000040466.16	3345.98	0.978201	0.0869353	11.2521	2.26257e-29	1.4994e-27
Ppp1r3e	protein_coding	ENSMUSG00000072494.7	136.912	0.976038	0.264605	3.68865	0.000225443	0.00125062
Rdh12	protein_coding	ENSMUSG00000021123.12	123.957	0.97268	0.260875	3.72853	0.000192599	0.00108321
Miip	protein_coding	ENSMUSG00000029022.18	1783.09	0.971318	0.107681	9.02031	1.87559e-19	6.22313e-18
Ass1	protein_coding	ENSMUSG00000076441.9	59551.6	0.971083	0.0670996	14.4723	1.81425e-47	2.7705e-45
Myo7a	protein_coding	ENSMUSG00000030761.15	30662.8	0.970322	0.129648	7.48428	7.19431e-14	1.5028e-12
Myh6	protein_coding	ENSMUSG00000040752.16	97.5844	0.970144	0.288999	3.35692	0.000788171	0.00381306
Ccdc28a	protein_coding	ENSMUSG00000059554.12	936.235	0.969917	0.119104	8.14345	3.84174e-16	9.66765e-15
RP23-395P6.9	protein_coding	ENSMUSG00000098794.1	439.169	0.969654	0.146743	6.60785	3.8995e-11	6.14965e-10
Pdlim7	protein_coding	ENSMUSG00000021493.15	6163.15	0.968555	0.0884719	10.9476	6.82299e-28	4.09147e-26
Mpp2	protein_coding	ENSMUSG00000017314.12	699.474	0.968546	0.145536	6.65501	2.83273e-11	4.52244e-10
Acox3	protein_coding	ENSMUSG00000029098.17	3342.8	0.968355	0.0804765	12.0328	2.39001e-33	1.95219e-31
Nipal1	protein_coding	ENSMUSG00000067219.9	395.05	0.96784	0.16773	5.77022	7.91663e-09	9.49455e-08
Il10rb	protein_coding	ENSMUSG00000022969.13	431.733	0.967656	0.152827	6.3317	2.42481e-10	3.47213e-09
Pitpnm1	protein_coding	ENSMUSG00000024851.13	1288.65	0.967101	0.110116	8.78254	1.5982e-18	4.92399e-17
Ift81	protein_coding	ENSMUSG00000029469.14	3096.31	0.966108	0.0873534	11.0598	1.96614e-28	1.22379e-26
Adamtsl5	protein_coding	ENSMUSG00000043822.18	873.471	0.964945	0.187758	5.1393	2.75767e-07	2.65363e-06
Parva	protein_coding	ENSMUSG00000030770.15	456.207	0.964785	0.190097	5.07523	3.87023e-07	3.64712e-06
Ltbp3	protein_coding	ENSMUSG00000024940.10	776.917	0.964259	0.135879	7.09643	1.28017e-12	2.32969e-11
Steap2	protein_coding	ENSMUSG00000015653.13	6409.73	0.963205	0.074388	12.9484	2.39923e-38	2.45781e-36
Casd1	protein_coding	ENSMUSG00000015189.12	1939.32	0.962573	0.0872505	11.0323	2.6698e-28	1.64099e-26
Kif21b	protein_coding	ENSMUSG00000041642.18	3738.76	0.961996	0.0941551	10.2171	1.66168e-24	7.91746e-23
Ahnak	protein_coding	ENSMUSG00000069833.12	34576.3	0.96088	0.0953475	10.0777	6.93579e-24	3.14618e-22
Eps8l2	protein_coding	ENSMUSG00000025504.14	393.148	0.959616	0.175129	5.47949	4.26553e-08	4.63012e-07
Kif26a	protein_coding	ENSMUSG00000021294.7	3236.13	0.958913	0.0917904	10.4468	1.51604e-25	7.71705e-24
Pqbp1	protein_coding	ENSMUSG00000031157.10	11326.5	0.957315	0.106153	9.0183	1.91039e-19	6.33003e-18
Slc39a4	protein_coding	ENSMUSG00000063354.7	4481.07	0.956914	0.0817693	11.7026	1.23606e-31	9.29351e-30
Ccdc155	protein_coding	ENSMUSG00000038292.14	1181.84	0.955834	0.12351	7.73893	1.00259e-14	2.24497e-13
Cyp46a1	protein_coding	ENSMUSG00000021259.5	168.317	0.955171	0.226918	4.20932	2.56145e-05	0.00017469
Vtcn1	protein_coding	ENSMUSG00000051076.8	232.136	0.954168	0.221117	4.31523	1.59438e-05	0.000112739
Spint2	protein_coding	ENSMUSG00000074227.12	19778.4	0.953225	0.0934903	10.196	2.06651e-24	9.77061e-23
Wdr72	protein_coding	ENSMUSG00000044976.17	98.988	0.952584	0.311833	3.05479	0.00225222	0.00952639
Palm	protein_coding	ENSMUSG00000035863.14	5161.78	0.952435	0.0886149	10.748	6.05481e-27	3.45391e-25
Efna1	protein_coding	ENSMUSG00000027954.9	358.492	0.951741	0.193833	4.91011	9.10248e-07	8.05303e-06
Grid2	protein_coding	ENSMUSG00000071424.10	488.951	0.951273	0.151425	6.28213	3.33956e-10	4.72419e-09
Fcgr1	protein_coding	ENSMUSG00000015947.10	138.324	0.949987	0.250065	3.79896	0.000145306	0.000839596
Snx25	protein_coding	ENSMUSG00000038291.16	2848.15	0.948206	0.0911836	10.3989	2.50904e-25	1.26668e-23
Ttc39d	protein_coding	ENSMUSG00000046196.4	218.136	0.948193	0.203836	4.65176	3.2912e-06	2.64782e-05
Ascl2	protein_coding	ENSMUSG00000009248.6	90.7896	0.947973	0.300182	3.158	0.00158856	0.00702578
Cnn2	protein_coding	ENSMUSG00000004665.10	2170.41	0.946808	0.0902298	10.4933	9.27368e-26	4.76993e-24
RP23-244H7.1	protein_coding	ENSMUSG00000082079.2	324.934	0.94659	0.176933	5.34998	8.79643e-08	9.12528e-07
Shmt2	protein_coding	ENSMUSG00000025403.5	77455.8	0.946433	0.0711201	13.3075	2.09308e-40	2.37145e-38
Mtmr11	protein_coding	ENSMUSG00000045934.15	479.758	0.944531	0.148191	6.37372	1.84496e-10	2.67612e-09
Rsph3b	protein_coding	ENSMUSG00000023806.10	1201.71	0.943948	0.12545	7.52449	5.29253e-14	1.11885e-12
Chst14	protein_coding	ENSMUSG00000074916.5	566.605	0.943589	0.151745	6.21826	5.02703e-10	6.93572e-09
Prss27	protein_coding	ENSMUSG00000050762.5	504.278	0.942551	0.152661	6.17414	6.65244e-10	9.09154e-09
Sec14l4	protein_coding	ENSMUSG00000019368.13	520.039	0.938837	0.17522	5.35803	8.41326e-08	8.75363e-07
Per2	protein_coding	ENSMUSG00000055866.9	186.651	0.938558	0.225156	4.16847	3.06645e-05	0.000205148
Slc2a4	protein_coding	ENSMUSG00000018566.14	287.677	0.937138	0.188311	4.97654	6.47313e-07	5.86182e-06
Rhbdd1	protein_coding	ENSMUSG00000026142.15	4032.38	0.933899	0.0910444	10.2576	1.09361e-24	5.30325e-23
Fah	protein_coding	ENSMUSG00000030630.16	5376.09	0.933461	0.0841045	11.0988	1.27103e-28	7.99221e-27
Ggt7	protein_coding	ENSMUSG00000027603.15	227.257	0.933175	0.233164	4.00223	6.27486e-05	0.000395168
Fam213b	protein_coding	ENSMUSG00000029059.9	2316.81	0.931242	0.102985	9.04247	1.53169e-19	5.12355e-18
Il6ra	protein_coding	ENSMUSG00000027947.11	4024.09	0.930902	0.0809696	11.4969	1.36685e-30	9.79749e-29
Mocos	protein_coding	ENSMUSG00000039616.9	523.507	0.929119	0.152275	6.10159	1.05022e-09	1.40025e-08
Nsg2	protein_coding	ENSMUSG00000020297.10	301.208	0.928326	0.187137	4.96067	7.02506e-07	6.31741e-06
Il4	protein_coding	ENSMUSG00000000869.12	205.338	0.927602	0.24781	3.7432	0.00018169	0.00102761
Vegfa	protein_coding	ENSMUSG00000023951.17	13591.8	0.927462	0.0788047	11.7691	5.63107e-32	4.33998e-30
Slc2a1	protein_coding	ENSMUSG00000028645.11	34183.5	0.927418	0.0685258	13.5339	9.87092e-42	1.1724e-39
Smim22	protein_coding	ENSMUSG00000096215.8	204.279	0.927145	0.202845	4.57071	4.8607e-06	3.78301e-05
Myh7b	protein_coding	ENSMUSG00000074652.3	2931.24	0.927001	0.0895736	10.349	4.22727e-25	2.0954e-23
Ldoc1	protein_coding	ENSMUSG00000057615.5	560.515	0.926842	0.182185	5.08738	3.6304e-07	3.43958e-06
Pold4	protein_coding	ENSMUSG00000024854.3	535.073	0.926684	0.161	5.7558	8.62335e-09	1.0312e-07
Adssl1	protein_coding	ENSMUSG00000011148.14	171.538	0.925574	0.247861	3.73424	0.000188281	0.00106113
Cd59b	protein_coding	ENSMUSG00000068686.12	524.519	0.925048	0.172044	5.3768	7.58225e-08	7.94956e-07
Speg	protein_coding	ENSMUSG00000026207.16	1395.85	0.925043	0.1045	8.85213	8.58683e-19	2.71357e-17
Gpd1l	protein_coding	ENSMUSG00000050627.13	9945.95	0.924552	0.0745372	12.4039	2.48937e-35	2.25013e-33
Gstm2	protein_coding	ENSMUSG00000040562.12	1189.62	0.924506	0.108259	8.53974	1.34523e-17	3.79721e-16
Glrx2	protein_coding	ENSMUSG00000018196.18	1831.8	0.923292	0.0897837	10.2835	8.36225e-25	4.07118e-23
Pyroxd2	protein_coding	ENSMUSG00000060224.3	110.353	0.923133	0.263887	3.49822	0.000468379	0.00240811
RP23-410L16.4	protein_coding	ENSMUSG00000095026.2	226.363	0.91898	0.191727	4.79318	1.64157e-06	1.39364e-05
Anxa4	protein_coding	ENSMUSG00000029994.17	6222.53	0.918719	0.0781879	11.7501	7.05056e-32	5.36672e-30
Cmtm8	protein_coding	ENSMUSG00000041012.4	112.758	0.918602	0.276326	3.32434	0.000886288	0.00422538
Slc25a38	protein_coding	ENSMUSG00000032519.11	10471	0.917717	0.0916872	10.0092	1.38848e-23	6.16192e-22
Ciapin1	protein_coding	ENSMUSG00000031781.14	39884.6	0.917543	0.0754517	12.1607	5.03434e-34	4.26808e-32
Flnc	protein_coding	ENSMUSG00000068699.12	1750.51	0.913558	0.100836	9.05981	1.30678e-19	4.38315e-18
Fgfr3	protein_coding	ENSMUSG00000054252.18	303.051	0.912959	0.170105	5.36702	8.00475e-08	8.36044e-07
Fads6	protein_coding	ENSMUSG00000044788.10	2465.47	0.912104	0.0932473	9.78156	1.35118e-22	5.58321e-21
Pgc	protein_coding	ENSMUSG00000023987.14	483.983	0.910876	0.153476	5.93497	2.93895e-09	3.71119e-08
Rufy4	protein_coding	ENSMUSG00000061815.11	161.973	0.909079	0.246398	3.68947	0.000224722	0.0012469
Mt1	protein_coding	ENSMUSG00000031765.8	32322.9	0.908347	0.101626	8.93815	3.95724e-19	1.28865e-17
Tmem159	protein_coding	ENSMUSG00000030917.13	379.589	0.907851	0.169931	5.34248	9.16844e-08	9.49517e-07
Hesx1	protein_coding	ENSMUSG00000040726.10	135.466	0.907555	0.281398	3.22516	0.00125902	0.00576106
Dnajb2	protein_coding	ENSMUSG00000026203.16	2491.29	0.907515	0.095637	9.48917	2.32887e-21	8.91863e-20
Prkra	protein_coding	ENSMUSG00000002731.6	2627.59	0.907399	0.111038	8.17195	3.03435e-16	7.67515e-15
Ccdc40	protein_coding	ENSMUSG00000039963.18	794.013	0.906206	0.120651	7.51096	5.86972e-14	1.23556e-12
Fam107b	protein_coding	ENSMUSG00000026655.15	798.492	0.905385	0.1293	7.00221	2.51963e-12	4.45347e-11
Pmvk	protein_coding	ENSMUSG00000027952.16	19352.3	0.904403	0.0925757	9.76933	1.52455e-22	6.27848e-21
Gchfr	protein_coding	ENSMUSG00000046814.3	176.968	0.903669	0.217356	4.15755	3.21676e-05	0.000214283
Gins3	protein_coding	ENSMUSG00000031669.10	6448.5	0.900381	0.080283	11.2151	3.43809e-29	2.24215e-27
Ptrh1	protein_coding	ENSMUSG00000053746.8	1010.27	0.899125	0.13209	6.80691	9.9716e-12	1.67004e-10
Tmem151a	protein_coding	ENSMUSG00000061451.13	217.786	0.898966	0.234585	3.83215	0.000127028	0.000744132
Plppr2	protein_coding	ENSMUSG00000040563.13	1013.75	0.895963	0.124667	7.18687	6.6295e-13	1.24043e-11
Ldhc	protein_coding	ENSMUSG00000030851.15	210.804	0.894775	0.197694	4.52606	6.00943e-06	4.61136e-05
Tcaim	protein_coding	ENSMUSG00000046603.16	841.579	0.894312	0.123234	7.25703	3.95689e-13	7.58255e-12
Atp4a	protein_coding	ENSMUSG00000005553.14	277.813	0.892953	0.198501	4.49848	6.844e-06	5.19823e-05
Ogfod1	protein_coding	ENSMUSG00000033009.15	17006.6	0.890837	0.0701069	12.7068	5.4191e-37	5.14417e-35
Zcrb1	protein_coding	ENSMUSG00000022635.9	3340.74	0.890426	0.0840785	10.5904	3.30144e-26	1.75312e-24
Ldha	protein_coding	ENSMUSG00000063229.15	220178	0.889807	0.0697775	12.7521	3.03598e-37	2.9503e-35
Plekhb1	protein_coding	ENSMUSG00000030701.17	1778.14	0.888469	0.091532	9.70665	2.82467e-22	1.14223e-20
Gramd3	protein_coding	ENSMUSG00000001700.9	413.634	0.888368	0.170992	5.19538	2.04302e-07	2.0116e-06
Ttc34	protein_coding	ENSMUSG00000046637.3	155.366	0.888266	0.231832	3.8315	0.000127364	0.000745563
Gprc5a	protein_coding	ENSMUSG00000046733.7	2463.6	0.88627	0.125245	7.07626	1.48093e-12	2.6674e-11
Svop	protein_coding	ENSMUSG00000042078.14	245.405	0.883928	0.184789	4.78345	1.7231e-06	1.45832e-05
Got2	protein_coding	ENSMUSG00000031672.8	43120.5	0.882374	0.0736935	11.9736	4.88823e-33	3.9664e-31
Ank3	protein_coding	ENSMUSG00000069601.14	4120.07	0.882008	0.0925097	9.53422	1.51013e-21	5.83774e-20
Rab39b	protein_coding	ENSMUSG00000031202.5	113.635	0.881065	0.268166	3.28552	0.00101793	0.00477609
Zfp185	protein_coding	ENSMUSG00000031351.15	2155.38	0.88028	0.105678	8.32984	8.0951e-17	2.13777e-15
Lsr	protein_coding	ENSMUSG00000001247.16	1306.15	0.877038	0.11737	7.47243	7.87279e-14	1.63342e-12
Mmel1	protein_coding	ENSMUSG00000058183.14	1907.45	0.87614	0.149609	5.85621	4.73554e-09	5.82723e-08
Tro	protein_coding	ENSMUSG00000025272.16	3059.73	0.875423	0.0894588	9.78577	1.29601e-22	5.36426e-21
Mt2	protein_coding	ENSMUSG00000031762.7	7677.88	0.874487	0.0903627	9.67752	3.75725e-22	1.5125e-20
Arl4d	protein_coding	ENSMUSG00000034936.2	3498.22	0.873521	0.0885261	9.86739	5.76459e-23	2.45204e-21
CAAA01147332.1	protein_coding	ENSMUSG00000095742.1	579.277	0.873433	0.141919	6.15444	7.53449e-10	1.02288e-08
Sec14l2	protein_coding	ENSMUSG00000003585.13	1646.06	0.870784	0.0926292	9.40075	5.41752e-21	2.02944e-19
Prss41	protein_coding	ENSMUSG00000024114.14	707.319	0.8702	0.150202	5.79351	6.89292e-09	8.32364e-08
Soat2	protein_coding	ENSMUSG00000023045.13	804.051	0.869675	0.134722	6.45532	1.0799e-10	1.60425e-09
Tpm2	protein_coding	ENSMUSG00000028464.16	1592.8	0.868916	0.117845	7.37338	1.66357e-13	3.32255e-12
RP23-144N15.11	protein_coding	ENSMUSG00000062944.4	656.967	0.866768	0.166344	5.2107	1.88125e-07	1.86426e-06
Rabggta	protein_coding	ENSMUSG00000040472.15	13766.6	0.865855	0.081724	10.5949	3.14758e-26	1.67503e-24
Dsc2	protein_coding	ENSMUSG00000024331.11	121.434	0.865164	0.268682	3.22003	0.00128178	0.00585109
Kif1a	protein_coding	ENSMUSG00000014602.15	558.157	0.864523	0.14385	6.00988	1.85655e-09	2.40745e-08
Cstb	protein_coding	ENSMUSG00000005054.7	11132.7	0.864372	0.092082	9.38698	6.17465e-21	2.30364e-19
Osbpl6	protein_coding	ENSMUSG00000042359.18	315.444	0.864097	0.19838	4.35578	1.32597e-05	9.51276e-05
Zcwpw1	protein_coding	ENSMUSG00000037108.13	2337.05	0.863886	0.11202	7.71189	1.23963e-14	2.75069e-13
Eif4b	protein_coding	ENSMUSG00000058655.9	213594	0.863333	0.0656932	13.1419	1.89427e-39	2.01612e-37
Slc2a9	protein_coding	ENSMUSG00000005107.13	171.827	0.8632	0.262556	3.28768	0.00101017	0.00474243
Cfap69	protein_coding	ENSMUSG00000040473.15	399.153	0.859928	0.171834	5.00442	5.60307e-07	5.1268e-06
Loxl2	protein_coding	ENSMUSG00000034205.16	524.641	0.859037	0.148599	5.78092	7.4295e-09	8.93648e-08
Plvap	protein_coding	ENSMUSG00000034845.6	161.469	0.858366	0.246069	3.48832	0.000486075	0.00249024
Asb13	protein_coding	ENSMUSG00000033781.7	715.227	0.85766	0.117853	7.27737	3.40386e-13	6.58955e-12
Abca14	protein_coding	ENSMUSG00000062017.15	151.993	0.856937	0.254693	3.36459	0.000766588	0.00372036
Apobr	protein_coding	ENSMUSG00000042759.12	289.715	0.855177	0.183984	4.6481	3.35007e-06	2.69254e-05
Nars	protein_coding	ENSMUSG00000024587.9	121364	0.854022	0.0830328	10.2854	8.20299e-25	4.01735e-23
Atp2a3	protein_coding	ENSMUSG00000020788.15	14355.9	0.853276	0.0867064	9.84098	7.49789e-23	3.16741e-21
Egfr	protein_coding	ENSMUSG00000020122.16	542.961	0.853246	0.165073	5.16889	2.35491e-07	2.29116e-06
Apoe	protein_coding	ENSMUSG00000002985.16	50883.9	0.852022	0.0903609	9.4291	4.13623e-21	1.56692e-19
Trio	protein_coding	ENSMUSG00000022263.10	4510.92	0.850568	0.106328	7.99951	1.2492e-15	3.01402e-14
Fgfr4	protein_coding	ENSMUSG00000005320.9	525.342	0.847956	0.144128	5.88334	4.02063e-09	4.98493e-08
Lgals9	protein_coding	ENSMUSG00000001123.15	534.536	0.846673	0.156814	5.3992	6.69372e-08	7.0814e-07
Hcn4	protein_coding	ENSMUSG00000032338.9	171.184	0.846565	0.258149	3.27937	0.00104041	0.00486394
Galm	protein_coding	ENSMUSG00000035473.10	2899.11	0.846216	0.0803394	10.533	6.08561e-26	3.16323e-24
Nup93	protein_coding	ENSMUSG00000032939.14	52229.2	0.845176	0.0744264	11.3559	6.93559e-30	4.7235e-28
Ttc12	protein_coding	ENSMUSG00000040219.4	1322.52	0.843362	0.0998931	8.44264	3.10248e-17	8.44713e-16
Tmem139	protein_coding	ENSMUSG00000071506.3	189.633	0.842594	0.264273	3.18834	0.00143092	0.00644226
Crybg2	protein_coding	ENSMUSG00000012123.17	625.665	0.841537	0.131252	6.41163	1.43977e-10	2.10703e-09
H2-T22	protein_coding	ENSMUSG00000056116.18	363.896	0.841182	0.174472	4.8213	1.42623e-06	1.22221e-05
Tmprss12	protein_coding	ENSMUSG00000045631.10	271.551	0.835154	0.191102	4.3702	1.24135e-05	8.96324e-05
Khdrbs2	protein_coding	ENSMUSG00000026058.11	2368.67	0.83243	0.126816	6.56408	5.23541e-11	8.10055e-10
Bcl6b	protein_coding	ENSMUSG00000000317.11	464.316	0.831744	0.147879	5.62451	1.86037e-08	2.13734e-07
RP23-132L14.7	protein_coding	ENSMUSG00000087385.8	1672.48	0.831036	0.138334	6.00747	1.88443e-09	2.43974e-08
Tmem161a	protein_coding	ENSMUSG00000002342.17	7030.37	0.829645	0.0784541	10.5749	3.89527e-26	2.05073e-24
Kcnt2	protein_coding	ENSMUSG00000052726.15	843.01	0.828733	0.153758	5.38985	7.05162e-08	7.43763e-07
Atp6v1b2	protein_coding	ENSMUSG00000006273.14	36258.4	0.828506	0.0714531	11.5951	4.36314e-31	3.16437e-29
Pstpip2	protein_coding	ENSMUSG00000025429.8	1288.29	0.827686	0.104112	7.94993	1.86621e-15	4.42455e-14
Ppp1r15a	protein_coding	ENSMUSG00000040435.12	7184.67	0.827259	0.0916142	9.02981	1.71972e-19	5.72915e-18
Acad12	protein_coding	ENSMUSG00000042647.13	1325.28	0.825997	0.102385	8.06753	7.17325e-16	1.76892e-14
Slc51a	protein_coding	ENSMUSG00000035699.8	1025.7	0.825808	0.12992	6.35629	2.0669e-10	2.97696e-09
Gipr	protein_coding	ENSMUSG00000030406.7	565.592	0.823827	0.140303	5.87178	4.31142e-09	5.32399e-08
P4ha1	protein_coding	ENSMUSG00000019916.14	11517.8	0.821565	0.0706122	11.6349	2.73974e-31	2.02889e-29
Procr	protein_coding	ENSMUSG00000027611.12	215.883	0.818915	0.219265	3.73481	0.000187855	0.00105931
Stim1	protein_coding	ENSMUSG00000030987.5	3992.07	0.818684	0.098811	8.28535	1.17761e-16	3.06379e-15
Tvp23a	protein_coding	ENSMUSG00000050908.12	1834.29	0.816827	0.0963527	8.47746	2.30156e-17	6.37951e-16
Pcca	protein_coding	ENSMUSG00000041650.15	3712.85	0.816427	0.140372	5.81615	6.02183e-09	7.30764e-08
Six6os1	protein_coding	ENSMUSG00000021098.14	891.749	0.815674	0.149378	5.46048	4.74846e-08	5.12717e-07
Klhdc8b	protein_coding	ENSMUSG00000032609.12	748.326	0.815095	0.119687	6.8102	9.74657e-12	1.63569e-10
Ndrg4	protein_coding	ENSMUSG00000036564.17	2796.4	0.815048	0.0928962	8.77376	1.72801e-18	5.31724e-17
Orc6	protein_coding	ENSMUSG00000031697.12	18581.7	0.814606	0.0845818	9.63098	5.91638e-22	2.34992e-20
Sncg	protein_coding	ENSMUSG00000023064.4	1816.17	0.813476	0.110511	7.36106	1.82449e-13	3.64012e-12
Nudt21	protein_coding	ENSMUSG00000031754.10	41679	0.81318	0.0793581	10.247	1.22111e-24	5.87521e-23
Psd	protein_coding	ENSMUSG00000037126.16	348.052	0.812739	0.168887	4.81233	1.49183e-06	1.27443e-05
Slc19a3	protein_coding	ENSMUSG00000038496.16	169.423	0.812331	0.214485	3.78736	0.000152259	0.000876274
RP23-459M2.1	protein_coding	ENSMUSG00000020083.13	1016.49	0.812009	0.118293	6.86436	6.67904e-12	1.13877e-10
Spta1	protein_coding	ENSMUSG00000026532.7	395.449	0.810835	0.149545	5.42203	5.89259e-08	6.27981e-07
Topaz1	protein_coding	ENSMUSG00000094985.2	169.278	0.808263	0.215644	3.74814	0.000178154	0.00100947
Spry2	protein_coding	ENSMUSG00000022114.5	13346.8	0.807924	0.106943	7.55474	4.19711e-14	8.94195e-13
Ppp1r9a	protein_coding	ENSMUSG00000032827.15	8368.05	0.803882	0.110551	7.27163	3.5518e-13	6.85974e-12
Kcnn1	protein_coding	ENSMUSG00000002908.17	858.207	0.803777	0.115126	6.9817	2.91628e-12	5.1324e-11
Ttc9b	protein_coding	ENSMUSG00000007944.8	168.679	0.803355	0.227289	3.53451	0.000408535	0.00213027
Amer1	protein_coding	ENSMUSG00000050332.7	4257.98	0.803242	0.112242	7.15634	8.28596e-13	1.5375e-11
Kcnd3	protein_coding	ENSMUSG00000040896.16	2702.89	0.801821	0.153215	5.2333	1.66506e-07	1.66276e-06
Tom1	protein_coding	ENSMUSG00000042870.15	8600.53	0.80173	0.0734012	10.9226	8.9918e-28	5.36583e-26
Mvb12b	protein_coding	ENSMUSG00000038740.9	1389.99	0.799934	0.130566	6.12666	8.97436e-10	1.20373e-08
Traf1	protein_coding	ENSMUSG00000026875.14	258.416	0.799286	0.207139	3.85869	0.000113994	0.000675828
Dusp3	protein_coding	ENSMUSG00000003518.13	2528.86	0.797979	0.0911052	8.75887	1.97222e-18	6.03847e-17
Rhod	protein_coding	ENSMUSG00000041845.10	1175.1	0.797971	0.115973	6.88068	5.9569e-12	1.02203e-10
Katnb1	protein_coding	ENSMUSG00000031787.8	15756.7	0.797658	0.0770073	10.3582	3.84062e-25	1.91532e-23
S100a1	protein_coding	ENSMUSG00000044080.9	190.836	0.797141	0.250998	3.17589	0.00149377	0.00667016
Mbnl2	protein_coding	ENSMUSG00000022139.17	3648.43	0.79659	0.11092	7.18167	6.8865e-13	1.28656e-11
Cgrrf1	protein_coding	ENSMUSG00000055128.15	511.457	0.796237	0.135551	5.87406	4.2525e-09	5.25651e-08
Bmi1	protein_coding	ENSMUSG00000026739.13	1735.01	0.796091	0.10473	7.60135	2.93054e-14	6.33131e-13
Cope	protein_coding	ENSMUSG00000055681.14	17303.9	0.795777	0.0746172	10.6648	1.48725e-26	8.16195e-25
Renbp	protein_coding	ENSMUSG00000031387.14	12817.2	0.794793	0.0810364	9.80785	1.04162e-22	4.34055e-21
Hdac6	protein_coding	ENSMUSG00000031161.15	25428.6	0.794779	0.0665565	11.9414	7.19955e-33	5.76574e-31
Cfap97	protein_coding	ENSMUSG00000031631.15	3318.42	0.793947	0.0822847	9.64878	4.97444e-22	1.98864e-20
Dll3	protein_coding	ENSMUSG00000003436.11	286.815	0.792446	0.191862	4.1303	3.6229e-05	0.000238865
Morc4	protein_coding	ENSMUSG00000031434.15	524.584	0.791498	0.150517	5.25854	1.45204e-07	1.46072e-06
Cacna2d4	protein_coding	ENSMUSG00000041460.14	368.583	0.790116	0.177324	4.45577	8.35932e-06	6.24118e-05
Gars	protein_coding	ENSMUSG00000029777.10	129127	0.789311	0.0769912	10.252	1.15967e-24	5.59052e-23
Pgm2	protein_coding	ENSMUSG00000025791.18	5661.02	0.789295	0.0748251	10.5485	5.1599e-26	2.68774e-24
Stat6	protein_coding	ENSMUSG00000002147.18	10027.3	0.789143	0.0743104	10.6196	2.41703e-26	1.30605e-24
Slco2a1	protein_coding	ENSMUSG00000032548.14	243.325	0.788669	0.209374	3.7668	0.000165354	0.000942591
Ube2l6	protein_coding	ENSMUSG00000027078.14	222.406	0.788506	0.189559	4.15969	3.18675e-05	0.000212387
Pde4dip	protein_coding	ENSMUSG00000038170.15	10057.6	0.78546	0.0731325	10.7402	6.58808e-27	3.74941e-25
Erbb3	protein_coding	ENSMUSG00000018166.8	7757.8	0.782727	0.0738499	10.5989	3.01501e-26	1.61146e-24
Dok4	protein_coding	ENSMUSG00000040631.8	208.791	0.782369	0.21249	3.68191	0.000231491	0.00128023
Twist1	protein_coding	ENSMUSG00000035799.6	263.904	0.780355	0.208208	3.74795	0.000178282	0.00100997
Spata31d1a	protein_coding	ENSMUSG00000050876.9	1131.09	0.780179	0.110121	7.08478	1.39269e-12	2.51955e-11
Ripply1	protein_coding	ENSMUSG00000072945.3	497.889	0.780052	0.159358	4.89498	9.83144e-07	8.64196e-06
Armcx2	protein_coding	ENSMUSG00000033436.13	4554.01	0.778484	0.0781174	9.96556	2.15653e-23	9.43423e-22
Dusp1	protein_coding	ENSMUSG00000024190.6	3742.87	0.777463	0.0843239	9.21996	2.97223e-20	1.04842e-18
B3gnt3	protein_coding	ENSMUSG00000031803.8	2067.95	0.776718	0.09885	7.85754	3.91745e-15	9.09485e-14
Aatk	protein_coding	ENSMUSG00000025375.15	353.746	0.775917	0.162986	4.76064	1.92982e-06	1.61438e-05
RP23-47P18.9	protein_coding	ENSMUSG00000047617.11	250.032	0.775354	0.191486	4.04913	5.14078e-05	0.000328545
Nup62cl	protein_coding	ENSMUSG00000072944.11	2139.16	0.771841	0.10496	7.35367	1.92843e-13	3.82975e-12
Ccdc88b	protein_coding	ENSMUSG00000047810.8	858.514	0.769992	0.120581	6.38566	1.70659e-10	2.48126e-09
Pomgnt2	protein_coding	ENSMUSG00000066235.7	2933.08	0.769829	0.0980257	7.85334	4.05101e-15	9.38719e-14
Msmo1	protein_coding	ENSMUSG00000031604.10	36710.7	0.769187	0.0787968	9.76165	1.6445e-22	6.73863e-21
Trip6	protein_coding	ENSMUSG00000023348.11	5407.64	0.769013	0.0915977	8.39555	4.6371e-17	1.24327e-15
Timm17b	protein_coding	ENSMUSG00000031158.11	9829.01	0.768759	0.10306	7.45932	8.69717e-14	1.79386e-12
Slc1a5	protein_coding	ENSMUSG00000001918.17	25947.3	0.767901	0.082172	9.34504	9.18522e-21	3.36554e-19
Fam192a	protein_coding	ENSMUSG00000031774.8	17423.9	0.767616	0.068705	11.1726	5.55094e-29	3.58203e-27
Clca4a	protein_coding	ENSMUSG00000068547.6	607.544	0.767366	0.152823	5.02129	5.13264e-07	4.73157e-06
Synpo2	protein_coding	ENSMUSG00000050315.13	2290.28	0.766728	0.148789	5.15313	2.56172e-07	2.47865e-06
Kdelr3	protein_coding	ENSMUSG00000010830.8	5217.97	0.766358	0.0820695	9.33791	9.82501e-21	3.58394e-19
C7	protein_coding	ENSMUSG00000079105.4	284.172	0.76602	0.188825	4.05677	4.97557e-05	0.000318898
Gata4	protein_coding	ENSMUSG00000021944.15	246.435	0.76457	0.214071	3.57157	0.000354848	0.0018774
Srxn1	protein_coding	ENSMUSG00000032802.8	12370.7	0.764413	0.0694205	11.0113	3.36938e-28	2.06069e-26
Cfap20	protein_coding	ENSMUSG00000031796.7	12510.1	0.763248	0.0757322	10.0783	6.89418e-24	3.13309e-22
Csnk2a2	protein_coding	ENSMUSG00000046707.9	26198.2	0.762887	0.0944821	8.0744	6.78077e-16	1.67381e-14
Adamts8	protein_coding	ENSMUSG00000031994.13	915.794	0.762233	0.124784	6.10841	1.00629e-09	1.3468e-08
Plpp2	protein_coding	ENSMUSG00000052151.12	3634.62	0.762194	0.0778867	9.78592	1.29409e-22	5.36426e-21
Abhd8	protein_coding	ENSMUSG00000007950.9	4546.56	0.761353	0.0887277	8.58078	9.42318e-18	2.70969e-16
Cdpf1	protein_coding	ENSMUSG00000064284.12	2394.04	0.761316	0.109205	6.97144	3.13711e-12	5.5092e-11
Ramp2	protein_coding	ENSMUSG00000001240.13	203.177	0.760781	0.23929	3.17933	0.00147618	0.0066012
Clcnka	protein_coding	ENSMUSG00000033770.13	301.257	0.760554	0.23108	3.2913	0.000997244	0.00469428
Sgsm1	protein_coding	ENSMUSG00000042216.13	7480.03	0.760486	0.075505	10.072	7.34772e-24	3.3269e-22
Acad10	protein_coding	ENSMUSG00000029456.12	2031.23	0.759974	0.100556	7.55773	4.10167e-14	8.74619e-13
Zap70	protein_coding	ENSMUSG00000026117.10	829.793	0.759944	0.147642	5.1472	2.64409e-07	2.55131e-06
Odf2l	protein_coding	ENSMUSG00000028256.16	2902.86	0.759751	0.0880641	8.62725	6.28427e-18	1.8328e-16
Madd	protein_coding	ENSMUSG00000040687.16	4749.51	0.757111	0.0908149	8.33686	7.62907e-17	2.01686e-15
Vwa5b2	protein_coding	ENSMUSG00000046613.19	274.728	0.756477	0.199689	3.78828	0.000151696	0.000873445
Hspb6	protein_coding	ENSMUSG00000036854.14	1239.51	0.756472	0.115197	6.56674	5.14292e-11	7.97251e-10
Lrrc4c	protein_coding	ENSMUSG00000050587.14	660.627	0.755609	0.164821	4.58442	4.55247e-06	3.56683e-05
Cln3	protein_coding	ENSMUSG00000030720.16	3372.71	0.755555	0.09443	8.00121	1.23198e-15	2.98126e-14
Bbs10	protein_coding	ENSMUSG00000035759.4	1102.38	0.755058	0.117662	6.41717	1.38832e-10	2.03781e-09
Dpp7	protein_coding	ENSMUSG00000026958.13	8725.34	0.755019	0.0782968	9.64304	5.26091e-22	2.09635e-20
Fgfbp3	protein_coding	ENSMUSG00000047632.10	207.164	0.753927	0.210388	3.5835	0.000339022	0.00180065
Dmc1	protein_coding	ENSMUSG00000022429.11	4058.89	0.753277	0.0957132	7.87015	3.5422e-15	8.23922e-14
Coq9	protein_coding	ENSMUSG00000031782.15	11608.4	0.753114	0.0800254	9.41094	4.91712e-21	1.85134e-19
Prrg3	protein_coding	ENSMUSG00000033361.13	641.516	0.752152	0.128675	5.84536	5.05471e-09	6.17977e-08
Dach2	protein_coding	ENSMUSG00000025592.17	405.568	0.751431	0.202753	3.70613	0.000210449	0.00117363
Primpol	protein_coding	ENSMUSG00000038225.15	2646.43	0.751191	0.0812709	9.24305	2.39559e-20	8.499e-19
Nos3	protein_coding	ENSMUSG00000028978.12	376.931	0.750439	0.156885	4.78337	1.7238e-06	1.45841e-05
Med22	protein_coding	ENSMUSG00000015776.12	13675	0.750333	0.0877634	8.5495	1.2362e-17	3.50152e-16
Pctp	protein_coding	ENSMUSG00000020553.8	1120.36	0.749388	0.111941	6.69447	2.16448e-11	3.50104e-10
Pmel	protein_coding	ENSMUSG00000025359.10	1479.98	0.748787	0.104594	7.15902	8.12587e-13	1.51007e-11
Phf10	protein_coding	ENSMUSG00000023883.13	933.79	0.747717	0.137869	5.4234	5.84746e-08	6.23983e-07
Dnase1	protein_coding	ENSMUSG00000005980.15	622.394	0.746059	0.146371	5.09703	3.45024e-07	3.27773e-06
Plin5	protein_coding	ENSMUSG00000011305.11	425.406	0.745552	0.160073	4.65756	3.19978e-06	2.58103e-05
Ttc8	protein_coding	ENSMUSG00000021013.16	865.873	0.74521	0.113236	6.58106	4.67105e-11	7.29621e-10
Flt4	protein_coding	ENSMUSG00000020357.3	1740.93	0.745164	0.104217	7.15012	8.67042e-13	1.60158e-11
Nckap1l	protein_coding	ENSMUSG00000022488.9	1158.01	0.744577	0.110643	6.72957	1.70166e-11	2.78727e-10
Il33	protein_coding	ENSMUSG00000024810.16	697.272	0.744366	0.161175	4.61836	3.8678e-06	3.06359e-05
Sepn1	protein_coding	ENSMUSG00000050989.9	579.533	0.744005	0.161749	4.59975	4.22998e-06	3.32795e-05
N4bp2l1	protein_coding	ENSMUSG00000041132.11	237.109	0.743987	0.199958	3.72072	0.000198653	0.00111381
Zfp512	protein_coding	ENSMUSG00000062761.7	8712.5	0.742945	0.06921	10.7347	6.99782e-27	3.96425e-25
Txndc16	protein_coding	ENSMUSG00000021830.14	1101.66	0.7425	0.121631	6.1045	1.0312e-09	1.37789e-08
Rap1gap	protein_coding	ENSMUSG00000041351.16	7581.92	0.742357	0.0779005	9.52956	1.57959e-21	6.09667e-20
Acp2	protein_coding	ENSMUSG00000002103.15	2849.15	0.741152	0.0817404	9.06715	1.22174e-19	4.11474e-18
Mocs1	protein_coding	ENSMUSG00000064120.13	2805.48	0.740969	0.1166	6.35481	2.0869e-10	3.00224e-09
Plcd3	protein_coding	ENSMUSG00000020937.14	3867.6	0.740785	0.0790634	9.3695	7.28736e-21	2.6902e-19
Clybl	protein_coding	ENSMUSG00000025545.10	1825.25	0.740577	0.140205	5.28211	1.27702e-07	1.29578e-06
Trappc11	protein_coding	ENSMUSG00000038102.15	16063.6	0.740342	0.070811	10.4552	1.38715e-25	7.09031e-24
Arl14ep	protein_coding	ENSMUSG00000027122.15	15299.5	0.738945	0.0793318	9.31461	1.224e-20	4.432e-19
Eef1akmt1	protein_coding	ENSMUSG00000021951.6	4454.97	0.738378	0.109625	6.73549	1.63373e-11	2.67779e-10
RP23-446P16.2	protein_coding	ENSMUSG00000037971.10	764.866	0.738015	0.119095	6.19685	5.7603e-10	7.92517e-09
Idua	protein_coding	ENSMUSG00000033540.18	402.684	0.737687	0.160877	4.58541	4.53093e-06	3.55221e-05
Ltbp4	protein_coding	ENSMUSG00000040488.17	23988.4	0.737266	0.0838164	8.7962	1.41521e-18	4.3877e-17
Kctd11	protein_coding	ENSMUSG00000046731.4	284.369	0.73722	0.198148	3.72056	0.00019878	0.00111427
Dnah1	protein_coding	ENSMUSG00000019027.8	555.324	0.736368	0.152807	4.81895	1.44316e-06	1.23586e-05
Hid1	protein_coding	ENSMUSG00000034586.14	553.168	0.735909	0.136448	5.39333	6.91633e-08	7.30119e-07
Arhgap29	protein_coding	ENSMUSG00000039831.16	2396.03	0.735908	0.0907239	8.11151	4.9995e-16	1.24639e-14
Polr2c	protein_coding	ENSMUSG00000031783.10	30125.1	0.735134	0.0861694	8.53126	1.44757e-17	4.07209e-16
Sesn2	protein_coding	ENSMUSG00000028893.8	30764.8	0.7349	0.0710708	10.3404	4.62647e-25	2.28866e-23
RP23-204C16.9	protein_coding	ENSMUSG00000022993.7	194.905	0.734155	0.229051	3.2052	0.00134969	0.0061224
Zfp280c	protein_coding	ENSMUSG00000036916.13	4981.43	0.733883	0.0771455	9.51297	1.85287e-21	7.11792e-20
Mthfd2	protein_coding	ENSMUSG00000005667.8	33204.5	0.732389	0.0857709	8.53889	1.35516e-17	3.82088e-16
Pibf1	protein_coding	ENSMUSG00000022064.10	7014.02	0.731462	0.0780377	9.37318	7.03781e-21	2.60198e-19
Cdc42ep2	protein_coding	ENSMUSG00000045664.4	294.612	0.730942	0.200875	3.6388	0.000273912	0.00148531
Tmem147	protein_coding	ENSMUSG00000006315.9	12041.6	0.730313	0.100541	7.26386	3.762e-13	7.23728e-12
Ccdc89	protein_coding	ENSMUSG00000044362.8	249.082	0.729698	0.196732	3.70909	0.000208002	0.00116068
Calr3	protein_coding	ENSMUSG00000019732.14	571.744	0.729326	0.138383	5.27035	1.36166e-07	1.37542e-06
Itga3	protein_coding	ENSMUSG00000001507.16	12817.6	0.729158	0.0817145	8.92325	4.52818e-19	1.46102e-17
Asrgl1	protein_coding	ENSMUSG00000024654.8	3987.44	0.727899	0.0841552	8.64949	5.1732e-18	1.52321e-16
Pfdn5	protein_coding	ENSMUSG00000001289.12	20969.1	0.72625	0.0987439	7.35489	1.91089e-13	3.798e-12
Zfp617	protein_coding	ENSMUSG00000066880.15	6781.16	0.726144	0.0910452	7.97564	1.5159e-15	3.61845e-14
Mfsd5	protein_coding	ENSMUSG00000045665.5	15819.5	0.724883	0.0830739	8.72576	2.64389e-18	8.00525e-17
Dusp5	protein_coding	ENSMUSG00000034765.6	3164.22	0.724305	0.0854425	8.4771	2.30875e-17	6.39222e-16
Fabp3	protein_coding	ENSMUSG00000028773.8	5181.73	0.723264	0.0959507	7.53787	4.77697e-14	1.0116e-12
Hfe2	protein_coding	ENSMUSG00000038403.10	338.567	0.723044	0.171825	4.20804	2.57596e-05	0.000175582
RP23-320I7.1	protein_coding	ENSMUSG00000033722.9	1499.75	0.72241	0.112034	6.44816	1.13216e-10	1.67682e-09
Myh14	protein_coding	ENSMUSG00000030739.18	3352.6	0.722138	0.12282	5.87966	4.11101e-09	5.08929e-08
Pvr	protein_coding	ENSMUSG00000040511.14	3762.05	0.722057	0.0767388	9.40927	4.99576e-21	1.87807e-19
Gbx1	protein_coding	ENSMUSG00000067724.5	872.629	0.721587	0.130699	5.52097	3.37132e-08	3.71525e-07
Anxa7	protein_coding	ENSMUSG00000021814.17	19128.3	0.721233	0.0752502	9.58446	9.29458e-22	3.65042e-20
Pacsin3	protein_coding	ENSMUSG00000027257.13	2551.71	0.720585	0.0948771	7.59493	3.07955e-14	6.64156e-13
Lonp2	protein_coding	ENSMUSG00000047866.18	9837.23	0.720313	0.0675983	10.6558	1.63872e-26	8.95323e-25
Eif4g3	protein_coding	ENSMUSG00000028760.16	2345.89	0.718499	0.111244	6.45875	1.05573e-10	1.57025e-09
Piwil2	protein_coding	ENSMUSG00000033644.5	1881.16	0.718054	0.109402	6.56347	5.25706e-11	8.12893e-10
Sec24d	protein_coding	ENSMUSG00000039234.11	6747.86	0.717189	0.0846156	8.47585	2.33374e-17	6.43966e-16
Gbe1	protein_coding	ENSMUSG00000022707.16	1265.89	0.71689	0.109083	6.57195	4.96592e-11	7.71759e-10
Necap1	protein_coding	ENSMUSG00000030327.8	18367.7	0.71687	0.0677929	10.5744	3.91639e-26	2.05744e-24
Trove2	protein_coding	ENSMUSG00000018199.9	3673.86	0.715615	0.0851516	8.40401	4.31486e-17	1.1594e-15
Ccdc116	protein_coding	ENSMUSG00000022768.17	564.699	0.715367	0.141138	5.06855	4.00851e-07	3.77021e-06
Bex4	protein_coding	ENSMUSG00000047844.3	15841.9	0.712469	0.114784	6.20706	5.39836e-10	7.43969e-09
Limd1	protein_coding	ENSMUSG00000025239.3	8258.8	0.712373	0.0773938	9.20453	3.43178e-20	1.20362e-18
Capn12	protein_coding	ENSMUSG00000054083.8	419.473	0.711859	0.216285	3.29131	0.00099722	0.00469428
Shc1	protein_coding	ENSMUSG00000042626.13	33324.2	0.710087	0.0694057	10.231	1.44064e-24	6.89095e-23
Slc35f5	protein_coding	ENSMUSG00000026342.10	2566.6	0.709964	0.0862443	8.23202	1.84088e-16	4.74919e-15
Vill	protein_coding	ENSMUSG00000038775.14	7596.51	0.709951	0.0877315	8.09231	5.85445e-16	1.44952e-14
Insl5	protein_coding	ENSMUSG00000066090.5	1499.57	0.70981	0.149879	4.73587	2.18116e-06	1.80742e-05
Mrpl23	protein_coding	ENSMUSG00000037772.13	3452.92	0.709572	0.092833	7.64354	2.11334e-14	4.62677e-13
Sh3bp2	protein_coding	ENSMUSG00000054520.15	940.975	0.709336	0.134797	5.26226	1.42292e-07	1.43259e-06
Rgs22	protein_coding	ENSMUSG00000037627.16	1529.39	0.709055	0.123979	5.71916	1.07049e-08	1.26839e-07
Dnmt3b	protein_coding	ENSMUSG00000027478.15	16134.1	0.708949	0.0676674	10.477	1.10221e-25	5.65741e-24
RP23-142L24.5	protein_coding	ENSMUSG00000053508.8	4194.35	0.707899	0.133043	5.32083	1.03294e-07	1.06437e-06
Zdhhc3	protein_coding	ENSMUSG00000025786.16	26168	0.706034	0.0643637	10.9694	5.3606e-28	3.23028e-26
Fam43a	protein_coding	ENSMUSG00000046546.3	2493.88	0.70549	0.101482	6.95185	3.60531e-12	6.29993e-11
Nxph4	protein_coding	ENSMUSG00000040258.6	258.644	0.704874	0.23004	3.06414	0.002183	0.00928088
Gnptg	protein_coding	ENSMUSG00000035521.13	3762.87	0.703557	0.0892376	7.88408	3.16849e-15	7.38393e-14
Swsap1	protein_coding	ENSMUSG00000051238.6	3625.57	0.703106	0.0890764	7.8933	2.94306e-15	6.87297e-14
Cnot1	protein_coding	ENSMUSG00000036550.16	138745	0.702751	0.118427	5.93404	2.95568e-09	3.7304e-08
Cat	protein_coding	ENSMUSG00000027187.10	17609.5	0.702657	0.0651528	10.7847	4.06374e-27	2.35639e-25
Grasp	protein_coding	ENSMUSG00000000531.5	7744.14	0.702614	0.0726736	9.66807	4.12094e-22	1.65551e-20
Vps35	protein_coding	ENSMUSG00000031696.9	47308	0.702056	0.0672447	10.4403	1.62254e-25	8.24211e-24
Cblc	protein_coding	ENSMUSG00000040525.13	1036.08	0.701922	0.114195	6.14671	7.91088e-10	1.06984e-08
Zkscan16	protein_coding	ENSMUSG00000038630.8	299.923	0.701828	0.183827	3.81788	0.000134601	0.000783824
Mpv17	protein_coding	ENSMUSG00000107283.3	4952.32	0.700709	0.0869068	8.06277	7.45858e-16	1.83744e-14
Aaas	protein_coding	ENSMUSG00000036678.8	25895.8	0.699451	0.0744046	9.40064	5.42319e-21	2.02944e-19
Ctf1	protein_coding	ENSMUSG00000042340.6	572.734	0.699237	0.180897	3.86538	0.000110916	0.000659008
Rassf1	protein_coding	ENSMUSG00000010067.13	2642.99	0.699195	0.115569	6.05003	1.44822e-09	1.90304e-08
Amz1	protein_coding	ENSMUSG00000050022.16	754.626	0.698542	0.124265	5.6214	1.89412e-08	2.17408e-07
Blvra	protein_coding	ENSMUSG00000001999.15	1755.13	0.697818	0.101998	6.84148	7.83794e-12	1.32716e-10
Cry1	protein_coding	ENSMUSG00000020038.10	9533.73	0.696035	0.0719989	9.6673	4.15198e-22	1.66526e-20
Emp1	protein_coding	ENSMUSG00000030208.15	2422.31	0.695942	0.0973927	7.14573	8.95167e-13	1.6523e-11
Mal	protein_coding	ENSMUSG00000027375.14	325.799	0.694929	0.196668	3.53352	0.000410069	0.00213736
Nlrc3	protein_coding	ENSMUSG00000049871.14	588.182	0.694626	0.158591	4.37998	1.18689e-05	8.59522e-05
Dnah7a	protein_coding	ENSMUSG00000096141.2	257.086	0.694551	0.212128	3.27421	0.00105959	0.00494423
Atp6v1g1	protein_coding	ENSMUSG00000039105.6	16516.9	0.693654	0.095318	7.27726	3.40659e-13	6.58965e-12
Akt1	protein_coding	ENSMUSG00000001729.14	11825.2	0.693324	0.0754779	9.18579	4.08529e-20	1.42268e-18
Ugdh	protein_coding	ENSMUSG00000029201.14	6062.79	0.692826	0.0719945	9.62332	6.37403e-22	2.51949e-20
Tsc22d1	protein_coding	ENSMUSG00000022010.19	46118.2	0.692296	0.0683222	10.1328	3.95086e-24	1.81902e-22
Sgk2	protein_coding	ENSMUSG00000017868.16	463.252	0.691626	0.183978	3.75929	0.000170394	0.000969969
RP24-227L14.1	protein_coding	ENSMUSG00000031983.7	3564.22	0.691145	0.0814745	8.48297	2.19522e-17	6.0985e-16
RP23-167L1.8	protein_coding	ENSMUSG00000050157.6	1393.74	0.691085	0.101171	6.83083	8.44221e-12	1.42164e-10
Hacd1	protein_coding	ENSMUSG00000063275.15	1154.5	0.690551	0.123833	5.57647	2.45451e-08	2.76439e-07
0610009O20Rik	protein_coding	ENSMUSG00000024442.5	14053.9	0.690289	0.082753	8.34156	7.33176e-17	1.94244e-15
Gdpd1	protein_coding	ENSMUSG00000061666.6	560.878	0.689945	0.133584	5.16487	2.406e-07	2.33903e-06
Exoc6	protein_coding	ENSMUSG00000053799.6	2921.81	0.689632	0.088105	7.82738	4.98133e-15	1.14673e-13
Tcaf1	protein_coding	ENSMUSG00000036667.14	587.727	0.689244	0.152605	4.51651	6.28661e-06	4.80456e-05
Ciz1	protein_coding	ENSMUSG00000039205.16	2873.75	0.688948	0.093188	7.3931	1.4344e-13	2.88122e-12
Agl	protein_coding	ENSMUSG00000033400.14	3895.11	0.688872	0.0829421	8.30546	9.94346e-17	2.60629e-15
Celf6	protein_coding	ENSMUSG00000032297.11	246.972	0.687376	0.21747	3.16078	0.00157346	0.00697531
Wwc1	protein_coding	ENSMUSG00000018849.6	11944.6	0.686625	0.104728	6.55627	5.51696e-11	8.49342e-10
Tnks1bp1	protein_coding	ENSMUSG00000033955.12	21907.5	0.685382	0.0763389	8.97815	2.75367e-19	9.05103e-18
Ap1m1	protein_coding	ENSMUSG00000003033.15	12229	0.68441	0.0842698	8.12165	4.59882e-16	1.15139e-14
Evx1	protein_coding	ENSMUSG00000005503.8	181.516	0.684224	0.213434	3.20579	0.00134691	0.00611206
Ascc1	protein_coding	ENSMUSG00000044475.14	7118.95	0.684179	0.0716784	9.54512	1.35946e-21	5.26357e-20
Nfkb1	protein_coding	ENSMUSG00000028163.17	11315.4	0.682093	0.0672514	10.1424	3.58078e-24	1.65483e-22
Gss	protein_coding	ENSMUSG00000027610.17	742.912	0.681703	0.129216	5.27567	1.32273e-07	1.33885e-06
Nlrp4f	protein_coding	ENSMUSG00000032999.10	340.053	0.68079	0.197176	3.4527	0.000555015	0.00280139
Atg4a	protein_coding	ENSMUSG00000079418.3	1277.17	0.679861	0.124226	5.47279	4.43011e-08	4.79818e-07
Nynrin	protein_coding	ENSMUSG00000075592.10	4661.03	0.679601	0.0943743	7.20112	5.97186e-13	1.12423e-11
Neu1	protein_coding	ENSMUSG00000007038.5	3954.63	0.679375	0.0939375	7.2322	4.75228e-13	9.03631e-12
Txnrd2	protein_coding	ENSMUSG00000075704.16	1195.54	0.67929	0.103041	6.59241	4.32754e-11	6.78984e-10
Espl1	protein_coding	ENSMUSG00000058290.4	45799	0.679278	0.0876285	7.7518	9.06005e-15	2.03425e-13
Use1	protein_coding	ENSMUSG00000002395.14	18425.3	0.678515	0.096286	7.04687	1.82992e-12	3.26253e-11
44263	protein_coding	ENSMUSG00000025702.15	2492.54	0.677867	0.0851066	7.96492	1.65335e-15	3.93507e-14
Crb2	protein_coding	ENSMUSG00000035403.10	295.163	0.677599	0.182892	3.70492	0.00021146	0.0011789
Prickle1	protein_coding	ENSMUSG00000036158.12	755.934	0.677546	0.142237	4.76348	1.90278e-06	1.59556e-05
Cryl1	protein_coding	ENSMUSG00000021947.11	967.973	0.677497	0.124022	5.46273	4.68871e-08	5.06488e-07
RP23-220D12.11	protein_coding	ENSMUSG00000074646.10	254.757	0.677484	0.221925	3.05276	0.00226747	0.00958197
Ctsd	protein_coding	ENSMUSG00000007891.16	10434.2	0.67737	0.0805995	8.40415	4.3097e-17	1.15928e-15
Bloc1s6	protein_coding	ENSMUSG00000005804.14	3401.86	0.677218	0.095412	7.09783	1.26734e-12	2.30806e-11
Fbxo8	protein_coding	ENSMUSG00000038206.13	3613.42	0.676896	0.0883421	7.66221	1.82758e-14	4.01903e-13
Sars	protein_coding	ENSMUSG00000068739.13	76617	0.676859	0.0885807	7.64116	2.15277e-14	4.70053e-13
Gstm3	protein_coding	ENSMUSG00000004038.9	289.436	0.676495	0.19003	3.55994	0.000370941	0.00195539
Snx33	protein_coding	ENSMUSG00000032733.6	389.511	0.676425	0.172446	3.92253	8.76227e-05	0.000532713
RP23-273D6.2	protein_coding	ENSMUSG00000028830.14	3584.52	0.67395	0.0870161	7.74512	9.5494e-15	2.14217e-13
Commd7	protein_coding	ENSMUSG00000056941.17	2571.74	0.673542	0.0918032	7.3368	2.18762e-13	4.32355e-12
RP23-149D11.2	protein_coding	ENSMUSG00000046133.3	653.276	0.673454	0.158697	4.24366	2.19903e-05	0.000151784
Nrip3	protein_coding	ENSMUSG00000034825.14	229.844	0.672784	0.205507	3.27378	0.00106117	0.00494675
Zfp868	protein_coding	ENSMUSG00000060427.15	5683.89	0.672773	0.0828038	8.12491	4.47695e-16	1.12202e-14
Wdr19	protein_coding	ENSMUSG00000037890.13	3713.52	0.672555	0.0908612	7.40201	1.34141e-13	2.70327e-12
Wdr17	protein_coding	ENSMUSG00000039375.16	228.361	0.672465	0.220492	3.04984	0.00228965	0.00966906
Cbr4	protein_coding	ENSMUSG00000031641.14	1756.96	0.671001	0.0966344	6.9437	3.81953e-12	6.65535e-11
Abhd14b	protein_coding	ENSMUSG00000042073.15	557.359	0.670871	0.145754	4.60278	4.16893e-06	3.28307e-05
Creb3l4	protein_coding	ENSMUSG00000027938.11	510.872	0.669889	0.14791	4.52903	5.9256e-06	4.54987e-05
Slc8a2	protein_coding	ENSMUSG00000030376.8	935.194	0.669314	0.112129	5.96917	2.38469e-09	3.04888e-08
Rinl	protein_coding	ENSMUSG00000051735.7	7050.29	0.669091	0.0803487	8.32734	8.26776e-17	2.18102e-15
Cdh4	protein_coding	ENSMUSG00000000305.12	3947.22	0.667772	0.125941	5.30225	1.14384e-07	1.17079e-06
Soat1	protein_coding	ENSMUSG00000026600.12	3267.02	0.66762	0.0809349	8.24884	1.59933e-16	4.13907e-15
Myg1	protein_coding	ENSMUSG00000001285.12	15874.5	0.667575	0.085825	7.77833	7.34882e-15	1.66065e-13
Calr	protein_coding	ENSMUSG00000003814.8	173769	0.66739	0.108432	6.15494	7.51068e-10	1.02021e-08
Tmem102	protein_coding	ENSMUSG00000089876.3	2052.62	0.666124	0.0980087	6.79658	1.0713e-11	1.78811e-10
Sult2b1	protein_coding	ENSMUSG00000003271.17	285.993	0.665716	0.210781	3.15832	0.00158679	0.00701921
AC157774.6	protein_coding	ENSMUSG00000058833.11	8829.07	0.665529	0.0938125	7.09425	1.30057e-12	2.36333e-11
Parp10	protein_coding	ENSMUSG00000063268.12	287.684	0.665326	0.185321	3.59014	0.000330506	0.0017596
Dmtn	protein_coding	ENSMUSG00000022099.17	21248.7	0.665243	0.0679678	9.78762	1.27259e-22	5.28512e-21
Ikbke	protein_coding	ENSMUSG00000042349.13	535.811	0.664544	0.152982	4.34395	1.39945e-05	9.99331e-05
Zbtb8b	protein_coding	ENSMUSG00000048485.12	1723.53	0.664388	0.0968323	6.86122	6.82765e-12	1.16169e-10
Hmgb2	protein_coding	ENSMUSG00000054717.7	59291	0.663542	0.0776326	8.5472	1.26108e-17	3.56379e-16
RP23-211B19.2	protein_coding	ENSMUSG00000036934.9	3642.06	0.663203	0.0989057	6.70541	2.00838e-11	3.26358e-10
Gab1	protein_coding	ENSMUSG00000031714.9	52885	0.662788	0.0858886	7.71683	1.19258e-14	2.65107e-13
Adgre5	protein_coding	ENSMUSG00000002885.14	12917.5	0.662746	0.0673072	9.84659	7.09073e-23	3.00573e-21
Arhgap18	protein_coding	ENSMUSG00000039031.16	351.679	0.662315	0.184973	3.58061	0.000342796	0.00181951
Gpsm1	protein_coding	ENSMUSG00000026930.15	1324.26	0.661863	0.12532	5.28138	1.28216e-07	1.29993e-06
Plk3	protein_coding	ENSMUSG00000028680.14	5348.49	0.661579	0.0834965	7.92342	2.31056e-15	5.44655e-14
Ccdc181	protein_coding	ENSMUSG00000026578.6	1494.52	0.660939	0.115814	5.70688	1.15065e-08	1.35878e-07
RP23-263M4.3	protein_coding	ENSMUSG00000097050.1	474.253	0.659341	0.161682	4.07801	4.54227e-05	0.000293422
Ceacam19	protein_coding	ENSMUSG00000049848.7	303.879	0.658982	0.191908	3.43384	0.000595105	0.00297989
Ctdspl	protein_coding	ENSMUSG00000047409.13	2857.75	0.658061	0.105072	6.26293	3.77805e-10	5.30178e-09
Ccdc191	protein_coding	ENSMUSG00000022701.18	1346.61	0.656971	0.100958	6.50739	7.64675e-11	1.15908e-09
Naaladl1	protein_coding	ENSMUSG00000054999.2	841.644	0.65684	0.125919	5.21639	1.82448e-07	1.81166e-06
Sin3b	protein_coding	ENSMUSG00000031622.16	21257.5	0.656706	0.0762957	8.60738	7.4748e-18	2.16716e-16
Cd99l2	protein_coding	ENSMUSG00000035776.14	1403.99	0.656629	0.118766	5.52874	3.22531e-08	3.57679e-07
Maff	protein_coding	ENSMUSG00000042622.14	978.211	0.655872	0.121228	5.41026	6.29333e-08	6.68082e-07
Pcsk4	protein_coding	ENSMUSG00000020131.14	362.412	0.655641	0.163011	4.02208	5.76875e-05	0.00036526
Scrn1	protein_coding	ENSMUSG00000019124.10	834.792	0.655532	0.120267	5.45065	5.01863e-08	5.3952e-07
Rad23a	protein_coding	ENSMUSG00000003813.15	17459.9	0.654832	0.0754875	8.67472	4.14583e-18	1.23401e-16
RP23-6P9.7	protein_coding	ENSMUSG00000035595.6	1139.2	0.654141	0.128079	5.10734	3.26727e-07	3.11474e-06
Top1mt	protein_coding	ENSMUSG00000000934.9	1858.58	0.653146	0.099968	6.53355	6.42277e-11	9.8264e-10
Arid5a	protein_coding	`	2487.03	0.652954	0.0939538	6.94973	3.65976e-12	6.39054e-11
Atp6ap1	protein_coding	ENSMUSG00000019087.13	12531.5	0.652943	0.0795928	8.20354	2.33412e-16	5.97157e-15
Ccdc130	protein_coding	ENSMUSG00000004994.12	3242.92	0.652793	0.087155	7.49003	6.88596e-14	1.44329e-12
Brd7	protein_coding	ENSMUSG00000031660.13	21265.4	0.651866	0.0743549	8.76697	1.83545e-18	5.62673e-17
Cerk	protein_coding	ENSMUSG00000035891.16	443.199	0.651851	0.156008	4.17833	2.93661e-05	0.000197482
Srrm3	protein_coding	ENSMUSG00000039860.19	471.074	0.651839	0.16058	4.05929	4.92213e-05	0.000315885
Trmt44	protein_coding	ENSMUSG00000029097.11	9817.83	0.651699	0.0707348	9.21328	3.16308e-20	1.11255e-18
Pfkfb4	protein_coding	ENSMUSG00000025648.18	2111.03	0.651591	0.0963557	6.76235	1.35767e-11	2.23874e-10
Slc22a7	protein_coding	ENSMUSG00000067144.6	255.961	0.651409	0.189656	3.43469	0.000593235	0.00297113
Stap2	protein_coding	ENSMUSG00000038781.6	1085.41	0.650509	0.129656	5.01721	5.24277e-07	4.82948e-06
Adamts15	protein_coding	ENSMUSG00000033453.8	371.191	0.650116	0.168507	3.85809	0.000114278	0.000677183
Slc35d2	protein_coding	ENSMUSG00000033114.11	1355.64	0.649701	0.106713	6.08832	1.14103e-09	1.51394e-08
Smim7	protein_coding	ENSMUSG00000044600.14	12141.9	0.649599	0.0822978	7.89327	2.94364e-15	6.87297e-14
Tspan33	protein_coding	ENSMUSG00000001763.14	376.658	0.649178	0.18019	3.60275	0.000314868	0.00168547
Grin2d	protein_coding	ENSMUSG00000002771.12	351.885	0.648945	0.176501	3.67673	0.000236241	0.00130259
Ccne2	protein_coding	ENSMUSG00000028212.16	2573.44	0.648539	0.108234	5.99203	2.07238e-09	2.66684e-08
Aacs	protein_coding	ENSMUSG00000029482.4	24171.8	0.648245	0.0658587	9.84296	7.35156e-23	3.11094e-21
Magee1	protein_coding	ENSMUSG00000031227.8	431.077	0.648224	0.16447	3.94128	8.10483e-05	0.000496302
Cpq	protein_coding	ENSMUSG00000039007.10	8066.13	0.647537	0.0890152	7.27445	3.47833e-13	6.72312e-12
Ipo5	protein_coding	ENSMUSG00000030662.10	157393	0.6464	0.0622759	10.3796	3.06989e-25	1.5372e-23
Rapgef3	protein_coding	ENSMUSG00000022469.17	10589.2	0.646265	0.0697797	9.26151	2.01568e-20	7.17185e-19
Cc2d1a	protein_coding	ENSMUSG00000036686.16	10225.2	0.645722	0.0753695	8.56742	1.05827e-17	3.02543e-16
Ftl1	protein_coding	ENSMUSG00000050708.16	130718	0.645421	0.0742846	8.68849	3.67275e-18	1.09852e-16
Ndrg2	protein_coding	ENSMUSG00000004558.15	7324.94	0.644903	0.0905164	7.1247	1.04304e-12	1.91805e-11
Tagln2	protein_coding	ENSMUSG00000026547.15	25675.4	0.644768	0.0764047	8.43885	3.2047e-17	8.70617e-16
Fst	protein_coding	ENSMUSG00000021765.9	692.518	0.644668	0.130933	4.92365	8.49437e-07	7.55308e-06
Farsa	protein_coding	ENSMUSG00000003808.18	37617.5	0.643764	0.0908099	7.08914	1.34943e-12	2.44489e-11
Gdf3	protein_coding	ENSMUSG00000030117.5	23888.7	0.64366	0.0936373	6.87397	6.24412e-12	1.06684e-10
Osbpl10	protein_coding	ENSMUSG00000040875.12	15792.8	0.642597	0.0963503	6.66938	2.56884e-11	4.13334e-10
Setd6	protein_coding	ENSMUSG00000031671.11	10343.7	0.642127	0.0851751	7.5389	4.73953e-14	1.00453e-12
Zfp709	protein_coding	ENSMUSG00000056019.12	1744.86	0.642065	0.119404	5.37724	7.56362e-08	7.93521e-07
Tlr2	protein_coding	ENSMUSG00000027995.10	4162.51	0.641215	0.0839758	7.63571	2.24577e-14	4.89057e-13
Zc4h2	protein_coding	ENSMUSG00000035062.13	621.883	0.640985	0.133094	4.81604	1.46433e-06	1.25224e-05
Mmab	protein_coding	ENSMUSG00000029575.17	5963.41	0.640859	0.0754357	8.49544	1.97184e-17	5.49033e-16
Esrp2	protein_coding	ENSMUSG00000084128.10	1510.63	0.640763	0.102898	6.22719	4.74877e-10	6.58136e-09
Lnx1	protein_coding	ENSMUSG00000029228.15	326.686	0.640333	0.170518	3.75521	0.000173193	0.000984081
Rpl14	protein_coding	ENSMUSG00000025794.9	258170	0.640282	0.098033	6.53129	6.52065e-11	9.96374e-10
Mctp2	protein_coding	ENSMUSG00000032776.9	2461.67	0.640231	0.129871	4.92975	8.23365e-07	7.33983e-06
Kcnip2	protein_coding	ENSMUSG00000025221.15	1372.7	0.640101	0.106967	5.98409	2.17598e-09	2.7922e-08
Baz1a	protein_coding	ENSMUSG00000035021.13	6352.36	0.6386	0.0928694	6.87633	6.14154e-12	1.0515e-10
Itga10	protein_coding	ENSMUSG00000090210.7	2498.58	0.638508	0.127998	4.98841	6.08798e-07	5.54367e-06
Hdac11	protein_coding	ENSMUSG00000034245.10	1338.37	0.638065	0.102357	6.23372	4.55481e-10	6.33755e-09
Tceal9	protein_coding	ENSMUSG00000042712.10	11965.5	0.637373	0.103115	6.18116	6.36312e-10	8.72039e-09
Heatr3	protein_coding	ENSMUSG00000031657.16	26848	0.637144	0.0759365	8.39048	4.8416e-17	1.29527e-15
Dnajb1	protein_coding	ENSMUSG00000005483.10	20079.3	0.636326	0.0839429	7.58046	3.4433e-14	7.40008e-13
RP24-84I4.2	protein_coding	ENSMUSG00000030486.9	821.185	0.635781	0.120928	5.25754	1.45996e-07	1.46808e-06
Atg7	protein_coding	ENSMUSG00000030314.16	4916.33	0.635235	0.0904542	7.02273	2.17581e-12	3.85964e-11
Ssx2ip	protein_coding	ENSMUSG00000036825.12	8558.39	0.634996	0.0777209	8.17021	3.07864e-16	7.77918e-15
Myo6	protein_coding	ENSMUSG00000033577.18	1542.52	0.633161	0.103404	6.12316	9.17398e-10	1.22916e-08
Arhgap45	protein_coding	ENSMUSG00000035697.14	1936.38	0.63294	0.0926407	6.8322	8.36207e-12	1.40911e-10
AC127333.1	protein_coding	ENSMUSG00000032743.15	3659.67	0.632713	0.1174	5.38936	7.07093e-08	7.45161e-07
Rell1	protein_coding	ENSMUSG00000047881.14	7786.94	0.632181	0.0955019	6.61957	3.60242e-11	5.71414e-10
Mthfd1l	protein_coding	ENSMUSG00000040675.17	50676.2	0.631941	0.065116	9.70485	2.8749e-22	1.16063e-20
Prex2	protein_coding	ENSMUSG00000048960.13	4474.38	0.631689	0.113748	5.55341	2.80153e-08	3.13084e-07
Rwdd4a	protein_coding	ENSMUSG00000031568.16	7166.95	0.630929	0.0842695	7.48704	7.04458e-14	1.47403e-12
Cdx1	protein_coding	ENSMUSG00000024619.8	15276	0.6309	0.106776	5.90865	3.44928e-09	4.31352e-08
Lpcat1	protein_coding	ENSMUSG00000021608.15	35896.6	0.63048	0.0676845	9.31497	1.21982e-20	4.42337e-19
Ttc38	protein_coding	ENSMUSG00000035944.17	1156.25	0.629578	0.112474	5.59752	2.17435e-08	2.46921e-07
Arap1	protein_coding	ENSMUSG00000032812.18	6727.8	0.62949	0.0799792	7.87067	3.52761e-15	8.21304e-14
Cx3cl1	protein_coding	ENSMUSG00000031778.13	444.331	0.628472	0.145862	4.30867	1.64242e-05	0.000116036
Dync1li1	protein_coding	ENSMUSG00000032435.9	29944.3	0.628091	0.0781435	8.03766	9.15713e-16	2.2424e-14
Pxmp4	protein_coding	ENSMUSG00000000876.11	2097.28	0.627877	0.0968315	6.48422	8.91897e-11	1.33953e-09
B4galt4	protein_coding	ENSMUSG00000022793.17	883.289	0.627232	0.127596	4.91578	8.8431e-07	7.83201e-06
Bmp1	protein_coding	ENSMUSG00000022098.10	604.636	0.627133	0.131216	4.77939	1.75828e-06	1.48452e-05
Unc93b1	protein_coding	ENSMUSG00000036908.16	560.562	0.626935	0.142635	4.39537	1.10583e-05	8.07245e-05
Phkb	protein_coding	ENSMUSG00000036879.15	7141.82	0.626793	0.104519	5.99695	2.01064e-09	2.59222e-08
Ankle1	protein_coding	ENSMUSG00000046295.13	5701.15	0.626136	0.0814537	7.68702	1.50601e-14	3.32674e-13
Rgs9bp	protein_coding	ENSMUSG00000056043.5	372.822	0.625948	0.196695	3.18232	0.001461	0.00654639
Nedd4	protein_coding	ENSMUSG00000032216.14	273912	0.625411	0.0700925	8.92265	4.5526e-19	1.46698e-17
Abcb1a	protein_coding	ENSMUSG00000040584.8	1566.48	0.625354	0.111555	5.60577	2.0733e-08	2.36539e-07
Rars	protein_coding	ENSMUSG00000018848.4	53746.7	0.624983	0.0798661	7.82538	5.0611e-15	1.16292e-13
Tmc4	protein_coding	ENSMUSG00000019734.16	374.734	0.624925	0.163991	3.81073	0.000138559	0.000803826
Ifrd1	protein_coding	ENSMUSG00000001627.12	15027	0.624633	0.0723134	8.63786	5.72767e-18	1.67437e-16
Fam25c	protein_coding	ENSMUSG00000043681.5	11430.1	0.622706	0.104798	5.94194	2.81675e-09	3.56238e-08
Cep44	protein_coding	ENSMUSG00000038215.15	4754.14	0.621989	0.0781572	7.95817	1.74598e-15	4.14751e-14
Wbp2	protein_coding	ENSMUSG00000034341.17	15504.1	0.621918	0.0881716	7.0535	1.74472e-12	3.11515e-11
Limk2	protein_coding	ENSMUSG00000020451.17	14020.8	0.621822	0.0707007	8.79513	1.42888e-18	4.4245e-17
Smim1	protein_coding	ENSMUSG00000078350.11	357.551	0.620979	0.175061	3.54722	0.000389323	0.00204092
Klf5	protein_coding	ENSMUSG00000005148.8	39455	0.620732	0.121121	5.12488	2.97728e-07	2.85378e-06
Vimp	protein_coding	ENSMUSG00000075701.9	5168.63	0.620537	0.0749358	8.28093	1.22221e-16	3.17645e-15
Ttll4	protein_coding	ENSMUSG00000033257.14	19304.3	0.620023	0.0717318	8.64363	5.44551e-18	1.59956e-16
Exosc7	protein_coding	ENSMUSG00000025785.5	16758.8	0.61983	0.070905	8.74169	2.29647e-18	6.99641e-17
Ccdc107	protein_coding	ENSMUSG00000028461.12	2781.73	0.619306	0.103309	5.99469	2.03869e-09	2.627e-08
Lrp3	protein_coding	ENSMUSG00000001802.16	664.226	0.618822	0.12548	4.93166	8.15335e-07	7.27352e-06
Cdkn2aip	protein_coding	ENSMUSG00000038069.6	3146.17	0.61861	0.0999136	6.19145	5.96141e-10	8.19268e-09
Zfp961	protein_coding	ENSMUSG00000052446.17	30097.4	0.618444	0.0717369	8.62101	6.63652e-18	1.93324e-16
Slc25a4	protein_coding	ENSMUSG00000031633.4	53331.2	0.617806	0.0938238	6.58475	4.55661e-11	7.14014e-10
Malrd1	protein_coding	ENSMUSG00000075520.5	1027.88	0.616321	0.18824	3.27412	0.00105992	0.00494481
Aifm2	protein_coding	ENSMUSG00000020085.15	5040.11	0.615848	0.089075	6.91382	4.71782e-12	8.13411e-11
RP23-42N14.3	protein_coding	ENSMUSG00000040591.18	2686.96	0.615218	0.0870108	7.07059	1.54276e-12	2.76863e-11
Slc1a4	protein_coding	ENSMUSG00000020142.12	14371.8	0.61477	0.0711005	8.64649	5.3106e-18	1.5618e-16
Fam179b	protein_coding	ENSMUSG00000035614.11	14834.1	0.613348	0.0712793	8.60486	7.64109e-18	2.21277e-16
Acyp1	protein_coding	ENSMUSG00000008822.15	2527.56	0.613088	0.102763	5.96607	2.4304e-09	3.10248e-08
Arc	protein_coding	ENSMUSG00000022602.14	5325.13	0.612823	0.0785253	7.80414	5.99076e-15	1.36632e-13
Gtpbp3	protein_coding	ENSMUSG00000007610.15	15459.9	0.612679	0.0852654	7.18555	6.69354e-13	1.25146e-11
Wdr66	protein_coding	ENSMUSG00000029442.18	539.987	0.612312	0.180762	3.38739	0.000705623	0.00346
Rhpn2	protein_coding	ENSMUSG00000030494.13	1228.72	0.612059	0.110839	5.52205	3.35059e-08	3.69406e-07
Smim10l1	protein_coding	ENSMUSG00000072704.6	2383.58	0.610961	0.0917727	6.65733	2.78847e-11	4.45756e-10
Ing2	protein_coding	ENSMUSG00000063049.4	4223.02	0.610912	0.0787818	7.75448	8.87048e-15	1.99899e-13
Cldn4	protein_coding	ENSMUSG00000047501.3	5314.96	0.609605	0.0935241	6.51815	7.11782e-11	1.08426e-09
Fermt3	protein_coding	ENSMUSG00000024965.8	812.989	0.609582	0.123994	4.91623	8.82283e-07	7.81687e-06
Fbxo47	protein_coding	ENSMUSG00000070336.3	744.311	0.607638	0.169311	3.58888	0.000332096	0.00176691
Hook1	protein_coding	ENSMUSG00000028572.13	10691.7	0.60685	0.0709998	8.54721	1.26098e-17	3.56379e-16
Mks1	protein_coding	ENSMUSG00000034121.12	4235.88	0.606814	0.0819323	7.40629	1.29885e-13	2.62612e-12
Txnl4b	protein_coding	ENSMUSG00000031723.8	2299.4	0.606651	0.121885	4.97726	6.44916e-07	5.84657e-06
Cnot10	protein_coding	ENSMUSG00000056167.7	33519.5	0.606207	0.0679273	8.92434	4.48356e-19	1.44852e-17
Pip5kl1	protein_coding	ENSMUSG00000046854.16	571.913	0.606104	0.139738	4.33744	1.44153e-05	0.00010255
Hsp90aa1	protein_coding	ENSMUSG00000021270.13	946007	0.605765	0.0974219	6.21796	5.03664e-10	6.94508e-09
Klrd1	protein_coding	ENSMUSG00000030165.16	301.948	0.605563	0.182194	3.32373	0.000888217	0.00423293
Rab6b	protein_coding	ENSMUSG00000032549.7	2034.68	0.605127	0.142885	4.23505	2.28501e-05	0.000157277
Gba	protein_coding	ENSMUSG00000028048.11	7212.55	0.604553	0.0921897	6.5577	5.46432e-11	8.41766e-10
Efcab11	protein_coding	ENSMUSG00000021176.6	1596.56	0.6035	0.132016	4.57142	4.84428e-06	3.77142e-05
Zswim8	protein_coding	ENSMUSG00000021819.11	6514.8	0.603251	0.0780886	7.72521	1.11667e-14	2.4936e-13
Bcdin3d	protein_coding	ENSMUSG00000037525.5	2123.78	0.602581	0.10228	5.89149	3.82729e-09	4.75481e-08
Eomes	protein_coding	ENSMUSG00000032446.14	5183.31	0.60251	0.0887584	6.78821	1.13536e-11	1.88608e-10
Gstz1	protein_coding	ENSMUSG00000021033.11	3651.65	0.602117	0.0842026	7.15082	8.62628e-13	1.59463e-11
Ddx39	protein_coding	ENSMUSG00000005481.18	69923.6	0.600572	0.0908187	6.61287	3.76951e-11	5.96379e-10
Azi2	protein_coding	ENSMUSG00000039285.12	9727.77	0.599701	0.0747713	8.02047	1.05344e-15	2.56434e-14
Dcxr	protein_coding	ENSMUSG00000039450.11	1618.24	0.599107	0.0940738	6.36848	1.90914e-10	2.76595e-09
Six5	protein_coding	ENSMUSG00000040841.5	850.947	0.598393	0.143129	4.1808	2.90484e-05	0.000195506
Dnah12	protein_coding	ENSMUSG00000021879.13	335.623	0.598302	0.172099	3.47651	0.000507992	0.00259549
Krt42	protein_coding	ENSMUSG00000053654.7	1986.49	0.59776	0.0948405	6.30279	2.92327e-10	4.16888e-09
Eif1b	protein_coding	ENSMUSG00000006941.5	3284.97	0.597493	0.0881705	6.77656	1.23068e-11	2.03753e-10
Csad	protein_coding	ENSMUSG00000023044.2	12304.9	0.5974	0.0702353	8.50569	1.80516e-17	5.03764e-16
Tmem121	protein_coding	ENSMUSG00000049036.7	998.627	0.597169	0.105571	5.65658	1.5442e-08	1.79422e-07
Cd38	protein_coding	ENSMUSG00000029084.5	8805.91	0.596716	0.0756486	7.888	3.07073e-15	7.1629e-14
Acbd4	protein_coding	ENSMUSG00000056938.16	4153.24	0.595612	0.0922089	6.45937	1.05138e-10	1.56472e-09
Slc44a2	protein_coding	ENSMUSG00000057193.8	9794.66	0.595559	0.067752	8.79029	1.49176e-18	4.6018e-17
Kcnq1	protein_coding	ENSMUSG00000009545.14	438.605	0.595452	0.162566	3.66283	0.000249441	0.00136861
Ccdc102a	protein_coding	ENSMUSG00000063605.5	5211.02	0.594841	0.0816728	7.28322	3.25948e-13	6.32498e-12
Jrk	protein_coding	ENSMUSG00000046380.3	5979.86	0.594663	0.0781259	7.61161	2.70706e-14	5.86912e-13
Ctnnb1	protein_coding	ENSMUSG00000006932.17	69642.3	0.594412	0.0690896	8.6035	7.73218e-18	2.23651e-16
Tmem128	protein_coding	ENSMUSG00000067365.10	2487.68	0.593599	0.0976237	6.08048	1.19821e-09	1.58724e-08
Dock3	protein_coding	ENSMUSG00000039716.12	1938.44	0.593126	0.127955	4.63543	3.56191e-06	2.84328e-05
Als2cl	protein_coding	ENSMUSG00000044037.15	5355.52	0.59286	0.0824538	7.19021	6.46913e-13	1.21135e-11
Mau2	protein_coding	ENSMUSG00000031858.16	24714.1	0.592406	0.064816	9.13981	6.25619e-20	2.15427e-18
Dclk3	protein_coding	ENSMUSG00000032500.10	379.885	0.591551	0.175981	3.36145	0.000775354	0.00375623
Fam189a2	protein_coding	ENSMUSG00000071604.4	792.889	0.591295	0.113866	5.1929	2.07043e-07	2.03615e-06
Oscp1	protein_coding	ENSMUSG00000042616.8	786.288	0.590273	0.126337	4.6722	2.97994e-06	2.41241e-05
Apool	protein_coding	ENSMUSG00000025525.12	2851.07	0.590103	0.0922829	6.3945	1.61077e-10	2.3475e-09
Smarca5	protein_coding	ENSMUSG00000031715.14	84319.3	0.589669	0.0815555	7.23028	4.82002e-13	9.14951e-12
Mgarp	protein_coding	ENSMUSG00000037161.14	1480.64	0.589164	0.106383	5.53814	3.05698e-08	3.39778e-07
Frmd4b	protein_coding	ENSMUSG00000030064.16	1306.1	0.588789	0.114057	5.16223	2.44022e-07	2.36855e-06
Elovl1	protein_coding	ENSMUSG00000006390.15	3994.49	0.588235	0.0867782	6.7786	1.21347e-11	2.01175e-10
Clic4	protein_coding	ENSMUSG00000037242.8	46321.7	0.587779	0.0655333	8.96917	2.98761e-19	9.79379e-18
Nfxl1	protein_coding	ENSMUSG00000072889.9	4916.57	0.587422	0.0897555	6.54469	5.96174e-11	9.14953e-10
Ptrf	protein_coding	ENSMUSG00000004044.9	7695.26	0.587125	0.0828693	7.08495	1.39092e-12	2.5182e-11
Siah2	protein_coding	ENSMUSG00000036432.8	3331.31	0.586896	0.0802292	7.31525	2.56908e-13	5.03293e-12
Lars	protein_coding	ENSMUSG00000024493.8	91517.3	0.584827	0.0792087	7.38337	1.54336e-13	3.08747e-12
Prdx2	protein_coding	ENSMUSG00000005161.15	58470.4	0.583711	0.0818603	7.13058	9.99483e-13	1.8407e-11
Src	protein_coding	ENSMUSG00000027646.15	21598.9	0.583549	0.0662691	8.80576	1.29973e-18	4.0501e-17
Ercc6	protein_coding	ENSMUSG00000054051.7	7400.08	0.583249	0.0745355	7.82512	5.07168e-15	1.16426e-13
Rab8a	protein_coding	ENSMUSG00000003037.16	23516.3	0.582984	0.0849094	6.86596	6.60472e-12	1.12688e-10
H2-Eb1	protein_coding	ENSMUSG00000060586.10	642.601	0.582894	0.151022	3.85966	0.000113544	0.000673322
Crebrf	protein_coding	ENSMUSG00000048249.14	2301.25	0.582263	0.119463	4.87399	1.09366e-06	9.54857e-06
Ccnd3	protein_coding	ENSMUSG00000034165.16	46256.3	0.582243	0.0750263	7.76052	8.45838e-15	1.90787e-13
Smim4	protein_coding	ENSMUSG00000058351.11	1626.75	0.582157	0.120393	4.83549	1.32821e-06	1.1434e-05
Tcl1	protein_coding	ENSMUSG00000041359.14	20789.1	0.581982	0.0781777	7.44435	9.74249e-14	1.99441e-12
Trpv2	protein_coding	ENSMUSG00000018507.16	386.269	0.581716	0.169724	3.42742	0.000609349	0.00304192
Arrdc2	protein_coding	ENSMUSG00000002910.11	3810.2	0.581656	0.0885915	6.5656	5.18236e-11	8.02352e-10
Nab2	protein_coding	ENSMUSG00000025402.12	1794.47	0.580995	0.116628	4.98163	6.30515e-07	5.72658e-06
Crlf1	protein_coding	ENSMUSG00000007888.15	401.238	0.580788	0.173156	3.35413	0.000796158	0.00384444
Fam114a1	protein_coding	ENSMUSG00000029185.14	610.003	0.580502	0.128686	4.511	6.45223e-06	4.92501e-05
Sirt4	protein_coding	ENSMUSG00000029524.16	1216.82	0.58049	0.117784	4.92841	8.29014e-07	7.38751e-06
Sv2a	protein_coding	ENSMUSG00000038486.9	366.552	0.58041	0.156041	3.71961	0.000199532	0.00111798
Hrsp12	protein_coding	ENSMUSG00000022323.11	3866.4	0.579029	0.0981261	5.90087	3.61597e-09	4.51051e-08
RP23-438P19.2	protein_coding	ENSMUSG00000032551.7	1821.52	0.578545	0.114406	5.05696	4.25992e-07	3.98605e-06
Fbxo17	protein_coding	ENSMUSG00000030598.15	2043.67	0.578339	0.098921	5.84648	5.02097e-09	6.14157e-08
Acad9	protein_coding	ENSMUSG00000027710.14	16381.7	0.578317	0.0712968	8.11141	5.00359e-16	1.24639e-14
Pir	protein_coding	ENSMUSG00000031379.13	3448.51	0.577982	0.0814021	7.10033	1.2446e-12	2.27001e-11
Chordc1	protein_coding	ENSMUSG00000001774.8	22723.3	0.577865	0.0810707	7.12792	1.01898e-12	1.8752e-11
Aldoa	protein_coding	ENSMUSG00000030695.16	287560	0.576916	0.0796763	7.24074	4.4623e-13	8.50465e-12
Eif3c	protein_coding	ENSMUSG00000030738.11	131554	0.576714	0.0683878	8.43299	3.36952e-17	9.11364e-16
Mapk12	protein_coding	ENSMUSG00000022610.10	428.823	0.57637	0.161817	3.56187	0.000368223	0.0019419
Asah1	protein_coding	ENSMUSG00000031591.14	21783.4	0.576152	0.080297	7.17525	7.21729e-13	1.34595e-11
Fkbp10	protein_coding	ENSMUSG00000001555.10	1445.69	0.57615	0.113384	5.08139	3.74689e-07	3.54448e-06
Ddx25	protein_coding	ENSMUSG00000032101.6	772.596	0.575841	0.13709	4.20046	2.6637e-05	0.000181111
Grb10	protein_coding	ENSMUSG00000020176.17	5839.54	0.574661	0.0719776	7.98389	1.41795e-15	3.39783e-14
Ints10	protein_coding	ENSMUSG00000031864.16	23413.6	0.574096	0.0743527	7.72126	1.15183e-14	2.56279e-13
Dcaf15	protein_coding	ENSMUSG00000037103.8	20053.8	0.573948	0.0767672	7.47647	7.63483e-14	1.58673e-12
Dync2li1	protein_coding	ENSMUSG00000024253.8	1228.39	0.573282	0.128411	4.46442	8.02849e-06	6.02261e-05
Fam126a	protein_coding	ENSMUSG00000028995.14	4111.4	0.573274	0.0910003	6.29969	2.98241e-10	4.24583e-09
Eno1	protein_coding	ENSMUSG00000063524.13	275810	0.572736	0.078774	7.27062	3.57841e-13	6.9003e-12
Svip	protein_coding	ENSMUSG00000074093.4	1061.46	0.572558	0.110016	5.20432	1.94704e-07	1.92481e-06
Efemp2	protein_coding	ENSMUSG00000024909.14	2482.34	0.572396	0.1036	5.52507	3.29359e-08	3.64102e-07
Bmp8a	protein_coding	ENSMUSG00000032726.12	1174.52	0.572332	0.103111	5.55066	2.8459e-08	3.17753e-07
Smagp	protein_coding	ENSMUSG00000053559.13	3616.83	0.571837	0.0843573	6.77875	1.21224e-11	2.01107e-10
44260	protein_coding	ENSMUSG00000023307.13	14503.2	0.57162	0.0721929	7.91795	2.41454e-15	5.6862e-14
Apoc1	protein_coding	ENSMUSG00000040564.14	4153.24	0.571416	0.103395	5.52652	3.26654e-08	3.61599e-07
Lrif1	protein_coding	ENSMUSG00000056260.15	1087.95	0.570943	0.130271	4.38273	1.17201e-05	8.50254e-05
Spcs3	protein_coding	ENSMUSG00000054408.9	18284.4	0.570087	0.0728897	7.82122	5.23119e-15	1.19976e-13
Abce1	protein_coding	ENSMUSG00000058355.8	86141.1	0.570007	0.0757757	7.5223	5.38218e-14	1.13682e-12
Elp6	protein_coding	ENSMUSG00000054836.12	4669.32	0.56962	0.0859137	6.63014	3.35367e-11	5.3437e-10
Mkks	protein_coding	ENSMUSG00000027274.16	4525.38	0.569249	0.0787807	7.22575	4.98361e-13	9.44696e-12
Eps15l1	protein_coding	ENSMUSG00000006276.10	22781.3	0.569207	0.0934806	6.08903	1.13594e-09	1.508e-08
Car11	protein_coding	ENSMUSG00000003273.14	605.676	0.569187	0.1551	3.6698	0.000242743	0.00133514
Pmaip1	protein_coding	ENSMUSG00000024521.7	1353.65	0.568973	0.109958	5.17447	2.28564e-07	2.22818e-06
Folr1	protein_coding	ENSMUSG00000001827.12	4672.92	0.568043	0.0937061	6.06196	1.34473e-09	1.77369e-08
Ramp3	protein_coding	ENSMUSG00000041046.7	551.575	0.567986	0.142301	3.99143	6.56763e-05	0.000411918
Zc2hc1c	protein_coding	ENSMUSG00000045064.4	582.425	0.567789	0.166651	3.40706	0.000656663	0.00324582
Dda1	protein_coding	ENSMUSG00000074247.10	15183.3	0.567261	0.0710204	7.98729	1.37941e-15	3.3087e-14
Spryd3	protein_coding	ENSMUSG00000036966.15	5892.64	0.567156	0.0791476	7.1658	7.73343e-13	1.44041e-11
Pafah2	protein_coding	ENSMUSG00000037366.14	5741.07	0.566999	0.0745439	7.60625	2.82171e-14	6.10691e-13
Hopx	protein_coding	ENSMUSG00000059325.14	982.164	0.566949	0.106477	5.32462	1.01162e-07	1.04371e-06
Calca	protein_coding	ENSMUSG00000030669.13	1254.57	0.56693	0.123963	4.57338	4.79926e-06	3.73874e-05
Zfp324	protein_coding	ENSMUSG00000004500.9	2961.58	0.56686	0.0814812	6.95694	3.47735e-12	6.08499e-11
Phyhip	protein_coding	ENSMUSG00000003469.9	543.283	0.565993	0.155347	3.6434	0.00026906	0.00146125
Spryd7	protein_coding	ENSMUSG00000021930.14	2458.26	0.565425	0.0974566	5.80181	6.56036e-09	7.93765e-08
F11r	protein_coding	ENSMUSG00000038235.4	7484.34	0.565392	0.0959561	5.8922	3.81095e-09	4.7417e-08
Tnpo2	protein_coding	ENSMUSG00000031691.14	25475.9	0.56524	0.0684201	8.2613	1.4409e-16	3.73298e-15
Zfp964	protein_coding	ENSMUSG00000091764.3	457.596	0.56513	0.149375	3.78329	0.00015477	0.000889683
Smoc1	protein_coding	ENSMUSG00000021136.13	4250.16	0.56512	0.11173	5.05793	4.23828e-07	3.9681e-06
Eif2b5	protein_coding	ENSMUSG00000003235.13	70606.2	0.56431	0.0885484	6.3729	1.85481e-10	2.68882e-09
Ddb2	protein_coding	ENSMUSG00000002109.14	1433.5	0.564271	0.125481	4.49687	6.89622e-06	5.23465e-05
Kdf1	protein_coding	ENSMUSG00000037600.16	888.991	0.564162	0.119089	4.73731	2.16575e-06	1.79646e-05
Tmem186	protein_coding	ENSMUSG00000043140.10	5772.65	0.563709	0.0737783	7.64058	2.16246e-14	4.71751e-13
Fsd1	protein_coding	ENSMUSG00000011589.8	2724.1	0.563535	0.0925623	6.08817	1.14212e-09	1.51457e-08
Orai3	protein_coding	ENSMUSG00000043964.14	3934.04	0.563525	0.0868199	6.49073	8.54197e-11	1.28684e-09
Ghitm	protein_coding	ENSMUSG00000041028.16	40920.6	0.563278	0.0700179	8.04477	8.64057e-16	2.11802e-14
Maged2	protein_coding	ENSMUSG00000025268.15	4664.61	0.561501	0.0864455	6.49543	8.27954e-11	1.25037e-09
Ccl27a	protein_coding	ENSMUSG00000073888.13	390.053	0.561374	0.153268	3.6627	0.000249574	0.00136873
Trappc6a	protein_coding	ENSMUSG00000002043.17	4137.95	0.561352	0.0829828	6.76468	1.33603e-11	2.20898e-10
Nudt15	protein_coding	ENSMUSG00000033405.4	1432.45	0.561115	0.110694	5.06906	3.99783e-07	3.7616e-06
Atp13a1	protein_coding	ENSMUSG00000031862.10	34239	0.560997	0.066484	8.43808	3.22603e-17	8.75445e-16
Polq	protein_coding	ENSMUSG00000034206.15	7751.1	0.560118	0.080762	6.93541	4.05053e-12	7.04288e-11
Akr1e1	protein_coding	ENSMUSG00000045410.18	2584.25	0.559934	0.101352	5.52464	3.30166e-08	3.6483e-07
44256	protein_coding	ENSMUSG00000036469.16	772.215	0.559706	0.149186	3.75174	0.000175608	0.000995878
Pde4c	protein_coding	ENSMUSG00000031842.14	936.415	0.559647	0.148478	3.76923	0.00016375	0.000934345
Me1	protein_coding	ENSMUSG00000032418.15	5470.21	0.559555	0.127717	4.3812	1.18026e-05	8.55225e-05
Tmem109	protein_coding	ENSMUSG00000034659.14	4302.7	0.558386	0.0821326	6.79859	1.05647e-11	1.76577e-10
Glb1l	protein_coding	ENSMUSG00000026200.13	1412.12	0.558256	0.107263	5.20458	1.94441e-07	1.92298e-06
Bhlha15	protein_coding	ENSMUSG00000052271.7	1001.8	0.558228	0.133485	4.18195	2.89023e-05	0.000194674
Sap30	protein_coding	ENSMUSG00000031609.3	14996.3	0.557988	0.10069	5.54163	2.99662e-08	3.33975e-07
AC140190.2	protein_coding	ENSMUSG00000068860.5	660.869	0.557044	0.143331	3.88643	0.000101728	0.000608869
Kif15	protein_coding	ENSMUSG00000036768.6	30491.8	0.556979	0.0673591	8.26879	1.35321e-16	3.51321e-15
Klc3	protein_coding	ENSMUSG00000040714.14	594.548	0.556815	0.147503	3.77495	0.000160037	0.000916105
Scarf1	protein_coding	ENSMUSG00000038188.17	365.828	0.556446	0.160696	3.46272	0.000534735	0.00271408
Hspa9	protein_coding	ENSMUSG00000024359.8	257553	0.556317	0.0852797	6.52344	6.87136e-11	1.04801e-09
Bsg	protein_coding	ENSMUSG00000023175.15	64810	0.556193	0.0885545	6.2808	3.36839e-10	4.76223e-09
Nol3	protein_coding	ENSMUSG00000014776.7	369.092	0.555635	0.163376	3.40096	0.00067149	0.00331046
Ift122	protein_coding	ENSMUSG00000030323.13	2986.39	0.555391	0.0809498	6.86093	6.84146e-12	1.16324e-10
Cald1	protein_coding	ENSMUSG00000029761.16	3382.26	0.554751	0.0902443	6.14722	7.88532e-10	1.06697e-08
Rspry1	protein_coding	ENSMUSG00000050079.10	10267.6	0.554438	0.0681283	8.13815	4.0137e-16	1.00901e-14
Pawr	protein_coding	ENSMUSG00000035873.8	9153.76	0.553931	0.0802377	6.90363	5.06909e-12	8.72139e-11
Zfp651	protein_coding	ENSMUSG00000013419.7	1398.07	0.553867	0.111688	4.95904	7.08409e-07	6.36817e-06
Abcb8	protein_coding	ENSMUSG00000028973.18	13629.3	0.553655	0.0778681	7.11016	1.15906e-12	2.12345e-11
Aktip	protein_coding	ENSMUSG00000031667.16	7715.43	0.553526	0.0797213	6.94327	3.83132e-12	6.67116e-11
Plek2	protein_coding	ENSMUSG00000021118.7	853.401	0.55247	0.132456	4.17098	3.03293e-05	0.000203071
Tmbim6	protein_coding	ENSMUSG00000023010.15	53412.9	0.552377	0.0767835	7.19396	6.29399e-13	1.18306e-11
Ap5b1	protein_coding	ENSMUSG00000049562.5	857.87	0.552351	0.120471	4.58495	4.54104e-06	3.559e-05
Pkp3	protein_coding	ENSMUSG00000054065.12	1830.62	0.552058	0.103737	5.32169	1.02807e-07	1.06024e-06
Rpl22l1	protein_coding	ENSMUSG00000039221.10	10579	0.551724	0.104251	5.29226	1.20811e-07	1.23043e-06
Ttc17	protein_coding	ENSMUSG00000027194.16	2864.86	0.551693	0.107108	5.15083	2.59333e-07	2.50726e-06
Celf4	protein_coding	ENSMUSG00000024268.16	2813.9	0.551666	0.0908544	6.07198	1.26345e-09	1.67007e-08
Cnpy2	protein_coding	ENSMUSG00000025381.3	16934.4	0.55164	0.0879661	6.27106	3.58601e-10	5.05247e-09
Cln5	protein_coding	ENSMUSG00000022125.7	5047.29	0.550987	0.076392	7.21262	5.48846e-13	1.03799e-11
Zswim4	protein_coding	ENSMUSG00000035671.6	9222.34	0.550861	0.0741644	7.42757	1.10612e-13	2.25498e-12
Tma16	protein_coding	ENSMUSG00000025591.6	11994.2	0.550777	0.0720775	7.64145	2.14792e-14	4.69411e-13
Kdm4a	protein_coding	ENSMUSG00000033326.15	28149.8	0.550213	0.0768653	7.15814	8.1777e-13	1.51856e-11
Rasgef1a	protein_coding	ENSMUSG00000030134.11	821.457	0.549329	0.152138	3.61073	0.000305333	0.00163907
Fam162a	protein_coding	ENSMUSG00000003955.8	12022.7	0.549167	0.0711891	7.71419	1.21749e-14	2.70399e-13
Stxbp2	protein_coding	ENSMUSG00000004626.14	8230.85	0.547786	0.0744644	7.35635	1.89006e-13	3.76267e-12
Tmem167b	protein_coding	ENSMUSG00000068732.5	5731.67	0.54743	0.10316	5.30661	1.11684e-07	1.14554e-06
Odf2	protein_coding	ENSMUSG00000026790.19	52963.6	0.547398	0.0679525	8.0556	7.90916e-16	1.9426e-14
Rac1	protein_coding	ENSMUSG00000001847.14	30313.5	0.54733	0.0733078	7.46619	8.25501e-14	1.7084e-12
Josd2	protein_coding	ENSMUSG00000038695.13	2145.17	0.547051	0.113226	4.83149	1.35515e-06	1.16536e-05
Mpv17l2	protein_coding	ENSMUSG00000035559.9	4831.47	0.546464	0.0901721	6.06023	1.35924e-09	1.78994e-08
Nadsyn1	protein_coding	ENSMUSG00000031090.14	1665.99	0.546216	0.0913665	5.9783	2.25485e-09	2.89039e-08
Padi4	protein_coding	ENSMUSG00000025330.6	3921.52	0.545847	0.0929059	5.87527	4.22165e-09	5.22363e-08
Pgrmc1	protein_coding	ENSMUSG00000006373.10	11703.7	0.544355	0.080493	6.76276	1.3539e-11	2.23402e-10
Slc5a6	protein_coding	ENSMUSG00000006641.12	5452.37	0.543869	0.0915051	5.9436	2.78835e-09	3.53009e-08
Tbc1d2	protein_coding	ENSMUSG00000039813.14	4768.53	0.543406	0.0886486	6.12989	8.79413e-10	1.18084e-08
Tmem175	protein_coding	ENSMUSG00000013495.15	2147.27	0.543342	0.093212	5.8291	5.57285e-09	6.78624e-08
Wdr83os	protein_coding	ENSMUSG00000059355.13	2055.13	0.543114	0.102828	5.28178	1.27935e-07	1.29761e-06
Slc22a14	protein_coding	ENSMUSG00000070280.13	1141.76	0.543037	0.115736	4.69205	2.70484e-06	2.2091e-05
Pithd1	protein_coding	ENSMUSG00000028669.15	12341	0.542035	0.0853976	6.34719	2.19279e-10	3.14722e-09
Chid1	protein_coding	ENSMUSG00000025512.15	4844.26	0.541595	0.0747866	7.24187	4.42543e-13	8.44094e-12
Smc1a	protein_coding	ENSMUSG00000041133.11	38190.5	0.540887	0.083025	6.51475	7.28132e-11	1.1071e-09
Galk2	protein_coding	ENSMUSG00000027207.15	7786.26	0.540773	0.0762202	7.09488	1.29467e-12	2.35435e-11
Nsmce1	protein_coding	ENSMUSG00000030750.13	7564.52	0.540019	0.0862636	6.2601	3.84722e-10	5.39269e-09
Snx10	protein_coding	ENSMUSG00000038301.15	6952.14	0.539945	0.0724556	7.45208	9.18772e-14	1.88713e-12
Ddx49	protein_coding	ENSMUSG00000057788.13	16370.5	0.539837	0.0796564	6.77706	1.22643e-11	2.03188e-10
H2afy2	protein_coding	ENSMUSG00000020086.6	9127.74	0.539392	0.0829341	6.50385	7.82878e-11	1.18594e-09
Prkx	protein_coding	ENSMUSG00000035725.13	2360.08	0.539025	0.0916167	5.88348	4.01738e-09	4.98341e-08
Atp5s	protein_coding	ENSMUSG00000054894.6	1232.81	0.53867	0.101407	5.31197	1.08448e-07	1.11514e-06
Rnf14	protein_coding	ENSMUSG00000060450.13	9442.84	0.538315	0.0763368	7.05185	1.76554e-12	3.15005e-11
Cntnap5b	protein_coding	ENSMUSG00000067028.11	2064.95	0.537938	0.107446	5.00657	5.54099e-07	5.07945e-06
Pdzd11	protein_coding	ENSMUSG00000015668.13	4268.83	0.537397	0.103546	5.18993	2.10377e-07	2.06481e-06
Etfrf1	protein_coding	ENSMUSG00000040370.13	2442.14	0.536431	0.113322	4.73371	2.20458e-06	1.82497e-05
Fbxl3	protein_coding	ENSMUSG00000022124.15	9699.94	0.536035	0.0694163	7.72204	1.14481e-14	2.54949e-13
Ehhadh	protein_coding	ENSMUSG00000022853.7	1572.11	0.535743	0.0986777	5.42922	5.66003e-08	6.04507e-07
Ppme1	protein_coding	ENSMUSG00000030718.9	10977.5	0.535742	0.0815028	6.57329	4.9214e-11	7.65322e-10
Spg20	protein_coding	ENSMUSG00000036580.15	3668.03	0.535514	0.0798769	6.70424	2.02452e-11	3.28763e-10
Rpsa	protein_coding	ENSMUSG00000032518.6	484053	0.535096	0.0948908	5.63907	1.70974e-08	1.9735e-07
Adgrb1	protein_coding	ENSMUSG00000034730.17	6459.38	0.53509	0.0941345	5.68431	1.31344e-08	1.54287e-07
Wwc2	protein_coding	ENSMUSG00000031563.8	17082.4	0.534844	0.0971131	5.50743	3.64108e-08	3.99107e-07
Elmo3	protein_coding	ENSMUSG00000014791.10	1291.5	0.534371	0.103669	5.15459	2.54189e-07	2.46043e-06
Mapkapk3	protein_coding	ENSMUSG00000032577.16	15102.5	0.534233	0.074906	7.13205	9.8887e-13	1.82252e-11
Pigp	protein_coding	ENSMUSG00000022940.17	1923.25	0.534084	0.102057	5.23319	1.66606e-07	1.66309e-06
Dnaja2	protein_coding	ENSMUSG00000031701.6	48061.9	0.533411	0.0819419	6.50963	7.53373e-11	1.14265e-09
Emd	protein_coding	ENSMUSG00000001964.14	11625.3	0.532541	0.0757117	7.0338	2.00986e-12	3.57558e-11
Fuca2	protein_coding	ENSMUSG00000019810.15	675.671	0.532528	0.126901	4.19639	2.71207e-05	0.000183899
Cspg5	protein_coding	ENSMUSG00000032482.9	1261.3	0.532417	0.103537	5.1423	2.71388e-07	2.61558e-06
Sptbn4	protein_coding	ENSMUSG00000011751.16	2887.09	0.532281	0.0960009	5.54455	2.94715e-08	3.2876e-07
Atp6ap2	protein_coding	ENSMUSG00000031007.2	11256.6	0.532253	0.0803173	6.62687	3.42868e-11	5.45615e-10
Klf12	protein_coding	ENSMUSG00000072294.5	6678.18	0.531378	0.148247	3.58442	0.000337833	0.00179472
Snx17	protein_coding	ENSMUSG00000029146.14	16904.1	0.530634	0.0776266	6.83573	8.15869e-12	1.37767e-10
Rpl18a	protein_coding	ENSMUSG00000045128.9	151841	0.530053	0.0869375	6.09694	1.08117e-09	1.43918e-08
Chtf18	protein_coding	ENSMUSG00000019214.13	26238.8	0.529911	0.070215	7.54698	4.45461e-14	9.46594e-13
Tbc1d13	protein_coding	ENSMUSG00000039678.12	52543.2	0.529676	0.0747812	7.08301	1.41053e-12	2.54621e-11
Babam1	protein_coding	ENSMUSG00000031820.9	15035.6	0.529585	0.0863756	6.13118	8.72299e-10	1.17321e-08
Ocel1	protein_coding	ENSMUSG00000002396.8	2524.84	0.529468	0.11989	4.41626	1.00423e-05	7.40111e-05
Hnrnph2	protein_coding	ENSMUSG00000045427.13	21889.6	0.528773	0.0939172	5.63021	1.79991e-08	2.06981e-07
Ccnb1	protein_coding	ENSMUSG00000041431.16	70688.7	0.528704	0.0915453	5.77532	7.68054e-09	9.22941e-08
Smg9	protein_coding	ENSMUSG00000002210.11	5686.23	0.528315	0.0755856	6.98963	2.75607e-12	4.86089e-11
Rangap1	protein_coding	ENSMUSG00000022391.16	74828.9	0.528191	0.0859894	6.14251	8.12282e-10	1.09609e-08
Atg3	protein_coding	ENSMUSG00000022663.3	3865.37	0.528138	0.0941071	5.61209	1.99892e-08	2.28687e-07
Zfp251	protein_coding	ENSMUSG00000022526.8	4785.47	0.527868	0.0828992	6.36759	1.92017e-10	2.78029e-09
Cars	protein_coding	ENSMUSG00000010755.17	51574.9	0.527565	0.0622611	8.47343	2.38273e-17	6.56746e-16
Utp11	protein_coding	ENSMUSG00000028907.7	9412.32	0.526373	0.0787317	6.68565	2.29896e-11	3.70881e-10
Ttc39b	protein_coding	ENSMUSG00000038172.14	27106.4	0.526357	0.104714	5.02663	4.9917e-07	4.61376e-06
Fnip1	protein_coding	ENSMUSG00000035992.15	8611.23	0.526214	0.0811117	6.48753	8.72552e-11	1.31289e-09
Chrnb1	protein_coding	ENSMUSG00000041189.9	937.54	0.525991	0.112534	4.67405	2.95321e-06	2.39471e-05
Dtwd1	protein_coding	ENSMUSG00000023330.12	2446.31	0.525172	0.111033	4.72989	2.24642e-06	1.85711e-05
Tmem38a	protein_coding	ENSMUSG00000031791.8	1694.57	0.524167	0.1083	4.83994	1.29879e-06	1.11964e-05
Ctsa	protein_coding	ENSMUSG00000017760.16	13963.1	0.523566	0.0778026	6.72942	1.70341e-11	2.78828e-10
Mvb12a	protein_coding	ENSMUSG00000031813.8	8798.18	0.52332	0.0934881	5.59772	2.17192e-08	2.4676e-07
Alg14	protein_coding	ENSMUSG00000039887.11	2714.35	0.52261	0.0818382	6.3859	1.70394e-10	2.47889e-09
Pramef8	protein_coding	ENSMUSG00000046862.14	6259.86	0.522287	0.0829333	6.29768	3.02134e-10	4.29629e-09
Hcrtr2	protein_coding	ENSMUSG00000032360.16	1300.74	0.521883	0.0987079	5.28714	1.24242e-07	1.26328e-06
Slc15a1	protein_coding	ENSMUSG00000025557.10	11326.9	0.521177	0.0837964	6.21956	4.98555e-10	6.88236e-09
Cnppd1	protein_coding	ENSMUSG00000033159.14	2377.76	0.521144	0.100142	5.20405	1.94988e-07	1.92607e-06
Sh3tc1	protein_coding	ENSMUSG00000036553.16	8480.26	0.521137	0.0681814	7.64338	2.11586e-14	4.62817e-13
Bnip3l	protein_coding	ENSMUSG00000022051.15	13674.9	0.520504	0.0678407	7.67245	1.68746e-14	3.7209e-13
Kif16b	protein_coding	ENSMUSG00000038844.10	8420.63	0.520438	0.0856679	6.07506	1.23941e-09	1.63916e-08
Adamts3	protein_coding	ENSMUSG00000043635.12	4150.3	0.520364	0.133495	3.89801	9.69866e-05	0.00058471
Srek1ip1	protein_coding	ENSMUSG00000021716.14	3961.73	0.520353	0.0825879	6.3006	2.9649e-10	4.22334e-09
Zfp334	protein_coding	ENSMUSG00000017667.9	4333.98	0.519989	0.0845352	6.15116	7.69199e-10	1.04196e-08
Bcat2	protein_coding	ENSMUSG00000030826.19	14778.8	0.519937	0.0965167	5.38702	7.16354e-08	7.53305e-07
Dguok	protein_coding	ENSMUSG00000014554.13	3569.43	0.519609	0.0866361	5.9976	2.00258e-09	2.58421e-08
Tars	protein_coding	ENSMUSG00000022241.6	76567.9	0.519275	0.0907983	5.71899	1.07156e-08	1.26905e-07
Chrna9	protein_coding	ENSMUSG00000029205.12	3281.85	0.519184	0.0842663	6.16123	7.21824e-10	9.81026e-09
Shpk	protein_coding	ENSMUSG00000005951.13	393.099	0.517137	0.161865	3.19487	0.00139894	0.00632018
RP23-115O3.10	protein_coding	ENSMUSG00000043311.7	2063.29	0.516848	0.123606	4.1814	2.89718e-05	0.000195044
Acd	protein_coding	ENSMUSG00000038000.10	5417.73	0.516297	0.0993589	5.19628	2.03316e-07	2.0043e-06
Hdac10	protein_coding	ENSMUSG00000062906.12	1432.28	0.516157	0.103897	4.96798	6.76549e-07	6.11509e-06
Golm1	protein_coding	ENSMUSG00000021556.12	31237.3	0.516153	0.0792255	6.51499	7.26956e-11	1.106e-09
Etfdh	protein_coding	ENSMUSG00000027809.14	7503.77	0.516107	0.0956357	5.39659	6.79201e-08	7.17304e-07
Hspa14	protein_coding	ENSMUSG00000109865.1	29666.7	0.515929	0.0919699	5.60976	2.02605e-08	2.3147e-07
Npl	protein_coding	ENSMUSG00000042684.8	7138.45	0.515721	0.117819	4.37723	1.20195e-05	8.69663e-05
Tssk6	protein_coding	ENSMUSG00000047654.6	709.384	0.515402	0.139327	3.69922	0.000216261	0.0012024
Leng1	protein_coding	ENSMUSG00000078813.3	2788.67	0.51517	0.0999908	5.15217	2.57489e-07	2.49041e-06
Gtf2ird2	protein_coding	ENSMUSG00000015942.9	2011.45	0.514493	0.095818	5.36948	7.89656e-08	8.25095e-07
Hes1	protein_coding	ENSMUSG00000022528.8	7400.52	0.514265	0.0923826	5.56669	2.59623e-08	2.90934e-07
Homez	protein_coding	ENSMUSG00000057156.10	1416.53	0.514152	0.116488	4.41378	1.01582e-05	7.47751e-05
Ttc41	protein_coding	ENSMUSG00000044937.15	993.585	0.513754	0.128872	3.98653	6.70453e-05	0.000419434
Pafah1b3	protein_coding	ENSMUSG00000005447.12	5384.19	0.513673	0.0936375	5.48576	4.11697e-08	4.4748e-07
Nyap1	protein_coding	ENSMUSG00000045348.16	2418.84	0.51366	0.103852	4.94609	7.57173e-07	6.78173e-06
Ppp6r2	protein_coding	ENSMUSG00000036561.8	2789.15	0.51284	0.0920819	5.56938	2.55641e-08	2.86733e-07
Klf15	protein_coding	ENSMUSG00000030087.11	4729.7	0.512722	0.0822887	6.23077	4.6414e-10	6.45073e-09
Agpat3	protein_coding	ENSMUSG00000001211.15	6086.2	0.512558	0.0816444	6.27793	3.43106e-10	4.83971e-09
Tbc1d24	protein_coding	ENSMUSG00000036473.15	3047.82	0.512414	0.100583	5.09444	3.49779e-07	3.31778e-06
Cers4	protein_coding	ENSMUSG00000008206.16	6126.25	0.511726	0.0791187	6.46783	9.94204e-11	1.48683e-09
Cnpy4	protein_coding	ENSMUSG00000036968.15	5754.91	0.51154	0.0985129	5.19262	2.07354e-07	2.03839e-06
Ulk2	protein_coding	ENSMUSG00000004798.14	526.312	0.511393	0.147528	3.46641	0.000527449	0.00268153
RP23-44G15.5	protein_coding	ENSMUSG00000062382.9	31357.4	0.511329	0.0831095	6.15247	7.62869e-10	1.03395e-08
Mylpf	protein_coding	ENSMUSG00000030672.12	29216.2	0.511289	0.101759	5.02453	5.04659e-07	4.65749e-06
Mlst8	protein_coding	ENSMUSG00000024142.14	4625.84	0.510421	0.0869081	5.87311	4.27684e-09	5.28394e-08
Ccdc125	protein_coding	ENSMUSG00000048924.14	884.672	0.510419	0.121117	4.21427	2.50588e-05	0.000171376
Mageh1	protein_coding	ENSMUSG00000047238.4	1304.59	0.509366	0.117573	4.33234	1.47533e-05	0.000104743
Rdh11	protein_coding	ENSMUSG00000066441.14	11472.7	0.509247	0.0717439	7.09812	1.26462e-12	2.30481e-11
Rbbp4	protein_coding	ENSMUSG00000057236.10	64585.6	0.509054	0.0673547	7.55781	4.09917e-14	8.74619e-13
Tcta	protein_coding	ENSMUSG00000039461.12	789.447	0.508844	0.11724	4.34019	1.42357e-05	0.000101449
Marveld1	protein_coding	ENSMUSG00000044345.9	3708.85	0.508295	0.0852358	5.9634	2.47043e-09	3.14868e-08
Optn	protein_coding	ENSMUSG00000026672.11	2037.36	0.508255	0.0965833	5.26234	1.4223e-07	1.43255e-06
Mrpl49	protein_coding	ENSMUSG00000007338.9	22102.9	0.507941	0.0956942	5.30796	1.10858e-07	1.13849e-06
Fam63b	protein_coding	ENSMUSG00000042444.10	872.052	0.507586	0.13908	3.64959	0.000262657	0.00143122
Slc50a1	protein_coding	ENSMUSG00000027953.13	1705.22	0.506984	0.105215	4.81855	1.44603e-06	1.23746e-05
Wdpcp	protein_coding	ENSMUSG00000020319.9	17943.7	0.505893	0.0765562	6.60812	3.89228e-11	6.14444e-10
Tmem192	protein_coding	ENSMUSG00000025521.15	4329.63	0.505886	0.0803849	6.29329	3.10799e-10	4.41183e-09
Prrc1	protein_coding	ENSMUSG00000024594.8	3035.75	0.505645	0.107767	4.692	2.70544e-06	2.2091e-05
Cbs	protein_coding	ENSMUSG00000024039.14	4360.26	0.505502	0.088713	5.69817	1.21099e-08	1.42661e-07
Dnd1	protein_coding	ENSMUSG00000044595.10	4510.47	0.505185	0.100909	5.00632	5.548e-07	5.08397e-06
Hist2h2ab	protein_coding	ENSMUSG00000063689.4	1113.56	0.504579	0.124318	4.05879	4.93273e-05	0.000316483
Atp6v0b	protein_coding	ENSMUSG00000033379.13	5009.53	0.50449	0.0832395	6.06071	1.35522e-09	1.78561e-08
Cfap157	protein_coding	ENSMUSG00000038987.8	469.035	0.504344	0.157369	3.20486	0.0013513	0.0061286
RP24-443B5.1	protein_coding	ENSMUSG00000030823.6	2050.13	0.504321	0.103351	4.87968	1.06259e-06	9.29378e-06
Snrk	protein_coding	ENSMUSG00000038145.17	3447.75	0.504206	0.0872555	5.7785	7.53673e-09	9.06103e-08
Rpgrip1l	protein_coding	ENSMUSG00000033282.14	1635.61	0.503587	0.130145	3.86944	0.000109086	0.00064955
Cfap77	protein_coding	ENSMUSG00000079502.8	47987.6	0.503468	0.097089	5.18563	2.15283e-07	2.10685e-06
Prkaca	protein_coding	ENSMUSG00000005469.10	15078.4	0.503058	0.0738924	6.80798	9.89756e-12	1.65877e-10
Pex26	protein_coding	ENSMUSG00000067825.11	2755.27	0.502559	0.0889362	5.65078	1.59719e-08	1.84879e-07
RP23-321N22.8	protein_coding	ENSMUSG00000096094.2	605.437	0.502452	0.139844	3.59296	0.000326942	0.00174297
Pink1	protein_coding	ENSMUSG00000028756.12	2463.87	0.502292	0.089406	5.6181	1.93071e-08	2.21401e-07
Cgref1	protein_coding	ENSMUSG00000029161.7	854.012	0.501976	0.139714	3.59289	0.000327029	0.00174297
Uck1	protein_coding	ENSMUSG00000002550.16	8841.3	0.500368	0.0851787	5.87433	4.24568e-09	5.25072e-08
RP23-24J10.5	protein_coding	ENSMUSG00000068240.5	12416.6	0.500182	0.113269	4.41588	1.00602e-05	7.41204e-05
Ssr4	protein_coding	ENSMUSG00000002014.12	11801.6	0.500084	0.0969111	5.16024	2.46635e-07	2.39202e-06
Tesk1	protein_coding	ENSMUSG00000028458.12	1466.51	0.498678	0.123788	4.02847	5.61412e-05	0.000356295
Eid2b	protein_coding	ENSMUSG00000070705.3	821.818	0.498497	0.142402	3.50063	0.000464164	0.00238943
Vdac3	protein_coding	ENSMUSG00000008892.12	27990.1	0.498249	0.0899185	5.54112	3.00543e-08	3.34805e-07
Senp8	protein_coding	ENSMUSG00000051705.13	2031.28	0.498241	0.101323	4.91738	8.77114e-07	7.77387e-06
Farsb	protein_coding	ENSMUSG00000026245.16	39696.7	0.497915	0.0756861	6.57868	4.74645e-11	7.39519e-10
Morn4	protein_coding	ENSMUSG00000049670.8	2572.58	0.497698	0.0898281	5.54056	3.01498e-08	3.35565e-07
Gzmm	protein_coding	ENSMUSG00000054206.2	721.852	0.497536	0.13875	3.58585	0.000335983	0.00178605
Pih1d2	protein_coding	ENSMUSG00000000167.14	450.137	0.497522	0.152067	3.27172	0.00106895	0.00497654
Fhl4	protein_coding	ENSMUSG00000050035.7	491.282	0.497428	0.135508	3.67083	0.000241764	0.00133006
Cuedc2	protein_coding	ENSMUSG00000036748.15	12281.4	0.497202	0.0828635	6.00025	1.97013e-09	2.54399e-08
Sacm1l	protein_coding	ENSMUSG00000025240.9	6854.58	0.497035	0.0823493	6.03569	1.58283e-09	2.07439e-08
Tigd5	protein_coding	ENSMUSG00000103906.1	1114.93	0.496628	0.111625	4.4491	8.62319e-06	6.4187e-05
Sapcd2	protein_coding	ENSMUSG00000026955.13	6352.63	0.496549	0.0818754	6.06469	1.32208e-09	1.74475e-08
Atp6v1a	protein_coding	ENSMUSG00000052459.13	26140.9	0.496428	0.0657229	7.55335	4.24194e-14	9.02182e-13
Snx1	protein_coding	ENSMUSG00000032382.14	14081.2	0.496349	0.0869198	5.71043	1.12693e-08	1.33205e-07
Mdfi	protein_coding	ENSMUSG00000032717.14	1538.79	0.496149	0.106715	4.6493	3.33057e-06	2.67774e-05
Ptgr2	protein_coding	ENSMUSG00000072946.12	4324.14	0.496101	0.0918026	5.40399	6.51743e-08	6.90977e-07
Abcc5	protein_coding	ENSMUSG00000022822.16	29952.6	0.495194	0.0776432	6.37781	1.79634e-10	2.60868e-09
Pex5	protein_coding	ENSMUSG00000005069.12	20731.5	0.49514	0.0668577	7.40588	1.30284e-13	2.63201e-12
Ccdc93	protein_coding	ENSMUSG00000026339.18	6848.83	0.494741	0.0769309	6.43098	1.26784e-10	1.86877e-09
Cd63	protein_coding	ENSMUSG00000025351.14	4891.16	0.493202	0.0823859	5.98649	2.14418e-09	2.75572e-08
Lin37	protein_coding	ENSMUSG00000036845.12	3220.57	0.493009	0.090417	5.45262	4.96334e-08	5.34276e-07
Mtbp	protein_coding	ENSMUSG00000022369.13	12861.9	0.492469	0.0811628	6.06767	1.2978e-09	1.71363e-08
Ufc1	protein_coding	ENSMUSG00000062963.10	13178.3	0.492339	0.0899579	5.473	4.42482e-08	4.79456e-07
Echs1	protein_coding	ENSMUSG00000025465.13	17830.7	0.492276	0.0806588	6.10319	1.03975e-09	1.3878e-08
Pabpc4	protein_coding	ENSMUSG00000011257.19	60930.4	0.49212	0.0656136	7.50026	6.36898e-14	1.33836e-12
Syf2	protein_coding	ENSMUSG00000028821.8	10595.3	0.491995	0.104978	4.68663	2.77747e-06	2.2619e-05
Gm6563	protein_coding	ENSMUSG00000051255.5	3481.67	0.491418	0.111737	4.39799	1.09259e-05	7.98765e-05
Npc2	protein_coding	ENSMUSG00000021242.9	36504.7	0.491399	0.0826993	5.94199	2.81578e-09	3.56238e-08
Dusp22	protein_coding	ENSMUSG00000069255.13	428.529	0.491193	0.153771	3.19431	0.00140167	0.00633015
Fam120b	protein_coding	ENSMUSG00000014763.8	4264.42	0.49111	0.0842338	5.83032	5.53198e-09	6.7398e-08
Khk	protein_coding	ENSMUSG00000029162.15	916.294	0.490934	0.130019	3.77587	0.000159448	0.00091316
Gaa	protein_coding	ENSMUSG00000025579.14	9808.73	0.49066	0.0829798	5.913	3.35931e-09	4.21173e-08
Des	protein_coding	ENSMUSG00000026208.9	1574.16	0.490047	0.114594	4.27638	1.89961e-05	0.000132757
Cldn6	protein_coding	ENSMUSG00000023906.2	628.828	0.489858	0.160857	3.0453	0.00232449	0.00979602
Aldoc	protein_coding	ENSMUSG00000017390.15	5433.36	0.489485	0.0890487	5.49682	3.86691e-08	4.22517e-07
Tmem263	protein_coding	ENSMUSG00000060935.6	9007.62	0.48911	0.0770589	6.34722	2.19243e-10	3.14722e-09
Parp11	protein_coding	ENSMUSG00000037997.12	2206.54	0.488774	0.0886947	5.51075	3.57312e-08	3.92533e-07
Slc30a9	protein_coding	ENSMUSG00000029221.15	14300	0.488735	0.0689242	7.0909	1.33242e-12	2.41763e-11
Rab3a	protein_coding	ENSMUSG00000031840.12	1608.37	0.487679	0.108891	4.47861	7.51316e-06	5.66795e-05
Idh2	protein_coding	ENSMUSG00000030541.16	38017.6	0.487634	0.0888034	5.49116	3.99309e-08	4.34783e-07
Timmdc1	protein_coding	ENSMUSG00000002846.9	5853.04	0.486669	0.0739269	6.58312	4.60691e-11	7.20519e-10
Ppt1	protein_coding	ENSMUSG00000028657.14	9098.55	0.486327	0.0776414	6.26375	3.75823e-10	5.27697e-09
Morf4l2	protein_coding	ENSMUSG00000031422.16	73341.4	0.486243	0.0897881	5.41545	6.11345e-08	6.5011e-07
Nop14	protein_coding	ENSMUSG00000036693.12	22748.5	0.486002	0.0683709	7.10832	1.17467e-12	2.14884e-11
Selo	protein_coding	ENSMUSG00000035757.16	930.702	0.484061	0.111828	4.32861	1.50051e-05	0.000106469
Wwtr1	protein_coding	ENSMUSG00000027803.14	11549.6	0.483708	0.0732417	6.60427	3.99491e-11	6.29204e-10
Golga4	protein_coding	ENSMUSG00000038708.10	41958.6	0.483499	0.064633	7.48068	7.39381e-14	1.54054e-12
Pycr1	protein_coding	ENSMUSG00000025140.15	5987.07	0.483259	0.0722963	6.68442	2.31834e-11	3.73517e-10
Birc3	protein_coding	ENSMUSG00000032000.17	1569.8	0.483023	0.0909977	5.30807	1.10789e-07	1.13827e-06
Snx5	protein_coding	ENSMUSG00000027423.15	98679.8	0.482877	0.0860669	5.61048	2.01764e-08	2.30616e-07
N6amt1	protein_coding	ENSMUSG00000044442.11	3039.17	0.48263	0.0836059	5.77267	7.80232e-09	9.37117e-08
Isyna1	protein_coding	ENSMUSG00000019139.10	49190.9	0.482517	0.0893456	5.40057	6.64304e-08	7.03687e-07
Slc35e4	protein_coding	ENSMUSG00000048807.2	600.411	0.481721	0.142083	3.39041	0.00069788	0.00342545
Ctns	protein_coding	ENSMUSG00000005949.9	3499.32	0.481663	0.0814512	5.91352	3.34876e-09	4.20064e-08
Dis3	protein_coding	ENSMUSG00000033166.11	38554.1	0.481414	0.0733583	6.5625	5.29136e-11	8.17169e-10
Atp6v0d1	protein_coding	ENSMUSG00000013160.7	12957.3	0.481002	0.066223	7.26337	3.77563e-13	7.25784e-12
Anapc16	protein_coding	ENSMUSG00000020107.10	6402.01	0.480756	0.0992187	4.84541	1.26348e-06	1.09111e-05
Cct2	protein_coding	ENSMUSG00000034024.8	158459	0.480739	0.0821579	5.85141	4.8743e-09	5.98301e-08
RP23-61A11.2	protein_coding	ENSMUSG00000074217.8	805.768	0.48062	0.140318	3.42522	0.0006143	0.0030628
Lamp1	protein_coding	ENSMUSG00000031447.7	26978.3	0.480602	0.0887421	5.41572	6.10432e-08	6.49419e-07
Sephs2	protein_coding	ENSMUSG00000049091.6	23206.3	0.480271	0.0926556	5.1834	2.17881e-07	2.13079e-06
Ltv1	protein_coding	ENSMUSG00000019814.5	21448.5	0.480148	0.0850817	5.64338	1.66744e-08	1.92649e-07
Zfp740	protein_coding	ENSMUSG00000046897.17	52826.5	0.480029	0.0778692	6.16456	7.06798e-10	9.62321e-09
Slc7a1	protein_coding	ENSMUSG00000041313.14	44546.6	0.479492	0.140829	3.40478	0.000662173	0.00327174
Eno1b	protein_coding	ENSMUSG00000059040.4	64620.1	0.479182	0.0846713	5.65931	1.51979e-08	1.76669e-07
Tceal8	protein_coding	ENSMUSG00000051579.10	13330.6	0.478534	0.113461	4.2176	2.46916e-05	0.000169235
Lrrc8d	protein_coding	ENSMUSG00000046079.16	14570.9	0.478353	0.097753	4.89349	9.90636e-07	8.7016e-06
Eif3i	protein_coding	ENSMUSG00000028798.16	60765.2	0.477377	0.0915948	5.21184	1.86978e-07	1.85365e-06
Echdc1	protein_coding	ENSMUSG00000019883.11	1490.85	0.477177	0.107936	4.42091	9.82864e-06	7.26539e-05
Crlf2	protein_coding	ENSMUSG00000033467.12	1858.81	0.476632	0.118163	4.03368	5.49099e-05	0.000348931
Syt3	protein_coding	ENSMUSG00000030731.13	784.31	0.476426	0.142371	3.34636	0.000818801	0.00394108
Atp6v1c1	protein_coding	ENSMUSG00000022295.8	18226.3	0.475944	0.0901448	5.27978	1.2934e-07	1.31079e-06
Commd6	protein_coding	ENSMUSG00000075486.10	4034.4	0.475394	0.107876	4.40688	1.04871e-05	7.68974e-05
Coro1a	protein_coding	ENSMUSG00000030707.15	804.274	0.475114	0.146187	3.25004	0.00115388	0.00533258
Cabp1	protein_coding	ENSMUSG00000029544.16	10149.6	0.475109	0.0699495	6.79217	1.10461e-11	1.83872e-10
Zfp28	protein_coding	ENSMUSG00000062861.8	942.879	0.473653	0.123471	3.83614	0.000124983	0.000733724
Pdrg1	protein_coding	ENSMUSG00000027472.14	5239.91	0.47361	0.0937697	5.05078	4.40005e-07	4.10705e-06
Ccdc71l	protein_coding	ENSMUSG00000090946.3	893.212	0.473577	0.119312	3.96923	7.21059e-05	0.000447563
Cds2	protein_coding	ENSMUSG00000058793.14	31666.8	0.4733	0.066808	7.08448	1.39566e-12	2.52122e-11
Pla1a	protein_coding	ENSMUSG00000002847.7	2517.74	0.473086	0.0966107	4.89683	9.73974e-07	8.57669e-06
Map1a	protein_coding	ENSMUSG00000027254.13	8342.84	0.473076	0.138111	3.42533	0.00061406	0.00306233
Adgrg6	protein_coding	ENSMUSG00000039116.6	3142	0.472564	0.0984952	4.79784	1.60386e-06	1.36445e-05
Mff	protein_coding	ENSMUSG00000026150.14	12074	0.472491	0.0771888	6.12124	9.28508e-10	1.24337e-08
Fam208b	protein_coding	ENSMUSG00000033799.10	9816.13	0.47221	0.0878645	5.3743	7.68798e-08	8.04669e-07
Cdc16	protein_coding	ENSMUSG00000038416.15	20855.7	0.472188	0.0845488	5.5848	2.33971e-08	2.64357e-07
Ttc26	protein_coding	ENSMUSG00000056832.14	3662.98	0.472058	0.0812384	5.81078	6.21829e-09	7.5386e-08
Slc35a5	protein_coding	ENSMUSG00000022664.11	1305.35	0.471063	0.103239	4.56285	5.04632e-06	3.92199e-05
Cep164	protein_coding	ENSMUSG00000043987.18	13108.1	0.470931	0.0730063	6.45055	1.11443e-10	1.65157e-09
AC102096.1	protein_coding	ENSMUSG00000024410.14	9704.56	0.470916	0.0763033	6.17163	6.7589e-10	9.22678e-09
Siae	protein_coding	ENSMUSG00000001942.8	2752.28	0.470655	0.0942244	4.99504	5.8823e-07	5.3703e-06
Zfp764	protein_coding	ENSMUSG00000045757.6	1597.79	0.470442	0.107184	4.3891	1.13821e-05	8.27758e-05
Gbas	protein_coding	ENSMUSG00000029432.12	9737.41	0.470387	0.0795265	5.91485	3.32177e-09	4.17105e-08
Rabac1	protein_coding	ENSMUSG00000003380.11	6928.09	0.470334	0.093592	5.02536	5.02481e-07	4.64087e-06
RP24-372E2.1	protein_coding	ENSMUSG00000060301.6	1445.78	0.47011	0.133114	3.53163	0.000413	0.00215128
Oxct1	protein_coding	ENSMUSG00000022186.14	11242.4	0.469694	0.0663959	7.07414	1.50382e-12	2.70467e-11
Trdn	protein_coding	ENSMUSG00000019787.9	972.473	0.469566	0.148903	3.15351	0.0016132	0.00712066
Pih1d1	protein_coding	ENSMUSG00000003423.15	9908.11	0.469507	0.0977611	4.80259	1.56625e-06	1.33569e-05
Ndfip2	protein_coding	ENSMUSG00000053253.16	5433.56	0.46869	0.0828954	5.654	1.56758e-08	1.81795e-07
Sirt2	protein_coding	ENSMUSG00000015149.14	3901.43	0.468447	0.0912751	5.13226	2.86286e-07	2.74839e-06
Pou3f1	protein_coding	ENSMUSG00000090125.3	386.395	0.468408	0.15251	3.07134	0.00213101	0.00908351
Itgb3bp	protein_coding	ENSMUSG00000028549.17	1585.41	0.468377	0.134305	3.48742	0.000487711	0.0024981
Gnpda1	protein_coding	ENSMUSG00000052102.14	22532.6	0.468125	0.0718994	6.51082	7.47399e-11	1.13499e-09
Kctd7	protein_coding	ENSMUSG00000034110.8	1297.82	0.467972	0.100344	4.66367	3.10619e-06	2.51296e-05
Fbxo3	protein_coding	ENSMUSG00000027180.12	9230.81	0.467943	0.0886777	5.2769	1.31389e-07	1.33044e-06
Usp38	protein_coding	ENSMUSG00000038250.9	17276.8	0.467884	0.0701618	6.66865	2.58163e-11	4.15121e-10
Ston2	protein_coding	ENSMUSG00000020961.15	11999.6	0.467855	0.0917279	5.10046	3.38826e-07	3.22508e-06
Cyp11a1	protein_coding	ENSMUSG00000032323.13	726.027	0.467437	0.13513	3.45916	0.000541869	0.00274688
Klhdc2	protein_coding	ENSMUSG00000020978.10	6040.52	0.467226	0.0833578	5.60507	2.08173e-08	2.37281e-07
Tax1bp3	protein_coding	ENSMUSG00000040158.12	1426.97	0.466705	0.11521	4.05091	5.10185e-05	0.000326226
Exog	protein_coding	ENSMUSG00000042787.14	4501.36	0.466285	0.0857199	5.43964	5.33895e-08	5.71705e-07
Nprl2	protein_coding	ENSMUSG00000010057.8	3892.98	0.466265	0.0941541	4.95214	7.34015e-07	6.58391e-06
Smcr8	protein_coding	ENSMUSG00000049323.8	18222.6	0.466079	0.0834401	5.58579	2.32645e-08	2.6298e-07
Zfp330	protein_coding	ENSMUSG00000031711.7	16145	0.465764	0.0848067	5.49207	3.97243e-08	4.33109e-07
Trmt1	protein_coding	ENSMUSG00000001909.16	27889.2	0.46558	0.0748011	6.22424	4.83896e-10	6.69126e-09
Mtmr1	protein_coding	ENSMUSG00000015214.14	2610.8	0.465573	0.0931826	4.99635	5.84256e-07	5.336e-06
Vps8	protein_coding	ENSMUSG00000033653.18	7337.84	0.465543	0.0847861	5.49079	4.00134e-08	4.35488e-07
Stip1	protein_coding	ENSMUSG00000024966.8	144014	0.465394	0.0893859	5.20657	1.9236e-07	1.90469e-06
Elovl7	protein_coding	ENSMUSG00000021696.9	2255.18	0.465167	0.121276	3.8356	0.000125257	0.00073498
Gng13	protein_coding	ENSMUSG00000025739.13	812.001	0.464782	0.127058	3.65803	0.000254157	0.00139014
Mep1b	protein_coding	ENSMUSG00000024313.7	7675.17	0.464676	0.0885861	5.24547	1.55885e-07	1.56178e-06
Pdgfrb	protein_coding	ENSMUSG00000024620.11	1541.21	0.464198	0.103774	4.47315	7.70772e-06	5.80404e-05
Lsm4	protein_coding	ENSMUSG00000031848.15	24634.8	0.463823	0.0827414	5.60569	2.0743e-08	2.36544e-07
Slc4a3	protein_coding	ENSMUSG00000006576.16	2007.91	0.463607	0.106789	4.34134	1.41614e-05	0.000100978
RP24-137C19.1	protein_coding	ENSMUSG00000049230.8	5259.85	0.463504	0.113367	4.08852	4.34137e-05	0.000281776
Tuft1	protein_coding	ENSMUSG00000005968.14	519.173	0.463175	0.138314	3.34872	0.000811865	0.00391306
Mon1b	protein_coding	ENSMUSG00000078908.10	2458.96	0.463046	0.0836511	5.53544	3.10447e-08	3.449e-07
Nmnat1	protein_coding	ENSMUSG00000028992.13	2852.18	0.462533	0.0931063	4.9678	6.77168e-07	6.1164e-06
Stk36	protein_coding	ENSMUSG00000033276.18	1431.32	0.462451	0.131097	3.52755	0.000419427	0.00218105
Kif3a	protein_coding	ENSMUSG00000018395.19	3527.32	0.461918	0.0855641	5.3985	6.71985e-08	7.10599e-07
Fam212b	protein_coding	ENSMUSG00000048458.8	856.057	0.461325	0.110771	4.16466	3.11814e-05	0.000208209
Cenpu	protein_coding	ENSMUSG00000031629.14	6771.89	0.461203	0.0751535	6.13681	8.41926e-10	1.1336e-08
Mocs2	protein_coding	ENSMUSG00000015536.14	4409.9	0.461128	0.0920947	5.00711	5.52529e-07	5.06884e-06
RP23-39I3.2	protein_coding	ENSMUSG00000020284.16	2631.23	0.461099	0.0879012	5.24565	1.55734e-07	1.5609e-06
Cdc20	protein_coding	ENSMUSG00000006398.15	55607.6	0.460839	0.0872124	5.2841	1.26325e-07	1.2834e-06
Fkbp8	protein_coding	ENSMUSG00000019428.16	50495.5	0.460556	0.0925423	4.9767	6.46767e-07	5.86119e-06
Slc35e1	protein_coding	ENSMUSG00000019731.13	19987.2	0.459922	0.0640989	7.17519	7.22079e-13	1.34595e-11
Zfp128	protein_coding	ENSMUSG00000060397.6	853.913	0.459626	0.117927	3.89755	9.71715e-05	0.00058541
Ptp4a2	protein_coding	ENSMUSG00000028788.14	40652.2	0.459237	0.0728831	6.30101	2.95712e-10	4.2147e-09
Lsm6	protein_coding	ENSMUSG00000031683.16	14107.1	0.459008	0.0851982	5.38754	7.14286e-08	7.51452e-07
Rin1	protein_coding	ENSMUSG00000024883.7	755.625	0.458432	0.141124	3.24844	0.0011604	0.00536071
Nudt13	protein_coding	ENSMUSG00000021809.10	1432.96	0.458404	0.111121	4.12528	3.70288e-05	0.000243811
Trpt1	protein_coding	ENSMUSG00000047656.8	828.806	0.457766	0.11561	3.95957	7.5085e-05	0.000463946
Bet1	protein_coding	ENSMUSG00000032757.6	2903.02	0.457292	0.0882406	5.18233	2.19129e-07	2.14215e-06
M6pr	protein_coding	ENSMUSG00000007458.14	52341.5	0.457118	0.0900153	5.07822	3.80981e-07	3.59708e-06
Kdelc1	protein_coding	ENSMUSG00000026047.13	5325.57	0.45634	0.0729584	6.2548	3.9802e-10	5.57274e-09
Zfp358	protein_coding	ENSMUSG00000047264.8	1416.59	0.455845	0.104331	4.36923	1.24684e-05	8.99497e-05
Pltp	protein_coding	ENSMUSG00000017754.13	7363.59	0.45574	0.0905821	5.03124	4.87316e-07	4.51268e-06
Bid	protein_coding	ENSMUSG00000004446.12	19556.1	0.455626	0.0677312	6.72697	1.73228e-11	2.83365e-10
Tmem9b	protein_coding	ENSMUSG00000031021.13	830.425	0.455243	0.14289	3.18597	0.00144269	0.00647847
Mtx3	protein_coding	ENSMUSG00000021704.8	2567.2	0.455116	0.0912172	4.98936	6.058e-07	5.51883e-06
Ppid	protein_coding	ENSMUSG00000027804.13	39911.2	0.454802	0.0908737	5.00477	5.59274e-07	5.11926e-06
Extl2	protein_coding	ENSMUSG00000027963.14	583.637	0.454018	0.13442	3.3776	0.00073122	0.0035734
Itga9	protein_coding	ENSMUSG00000039115.13	16582	0.453889	0.090045	5.04069	4.63848e-07	4.31649e-06
Apc2	protein_coding	ENSMUSG00000020135.13	814.216	0.453354	0.148303	3.05695	0.00223601	0.00947019
Mib2	protein_coding	ENSMUSG00000029060.17	16406.6	0.453097	0.0721509	6.27985	3.3889e-10	4.78572e-09
Rnf215	protein_coding	ENSMUSG00000003581.14	1920.11	0.452924	0.0923128	4.9064	9.27611e-07	8.1919e-06
Man2b1	protein_coding	ENSMUSG00000005142.10	14328.6	0.452415	0.0690377	6.55316	5.63339e-11	8.66183e-10
Ift74	protein_coding	ENSMUSG00000028576.12	5865.4	0.451348	0.0868906	5.19443	2.05344e-07	2.02105e-06
Prkab1	protein_coding	ENSMUSG00000029513.14	3658.39	0.450854	0.0817333	5.51616	3.46484e-08	3.81489e-07
RP23-200C3.1	protein_coding	ENSMUSG00000037818.16	1414.52	0.450686	0.122402	3.68201	0.000231398	0.00128019
Clcn3	protein_coding	ENSMUSG00000004319.15	22077.7	0.450505	0.0722552	6.23492	4.52022e-10	6.29608e-09
Dhrs7	protein_coding	ENSMUSG00000021094.10	681.302	0.450101	0.139355	3.22988	0.00123841	0.00567736
Pld2	protein_coding	ENSMUSG00000020828.13	1289.11	0.449781	0.102834	4.37385	1.22072e-05	8.81947e-05
RP23-216P14.8	protein_coding	ENSMUSG00000045767.9	10248.2	0.449503	0.0700392	6.41788	1.38187e-10	2.02956e-09
Naga	protein_coding	ENSMUSG00000022453.8	2293.48	0.449336	0.0906558	4.95651	7.17723e-07	6.44483e-06
Lck	protein_coding	ENSMUSG00000000409.14	4562.01	0.449327	0.0793456	5.66291	1.48826e-08	1.73249e-07
Tm2d1	protein_coding	ENSMUSG00000028563.16	1116.79	0.448875	0.121957	3.68059	0.000232695	0.00128591
Cul4a	protein_coding	ENSMUSG00000031446.14	15814.3	0.44876	0.0699009	6.41995	1.36315e-10	2.00445e-09
Tfcp2	protein_coding	ENSMUSG00000009733.9	5552.46	0.448352	0.0757774	5.91669	3.28476e-09	4.12878e-08
Slc38a9	protein_coding	ENSMUSG00000047789.5	2010.15	0.44817	0.107206	4.18046	2.90915e-05	0.000195743
Zbtb7b	protein_coding	ENSMUSG00000028042.15	6697.75	0.446949	0.0829373	5.389	7.08514e-08	7.46338e-07
Zdhhc23	protein_coding	ENSMUSG00000036304.14	1066.22	0.446771	0.104647	4.26931	1.96074e-05	0.000136679
Tmem205	protein_coding	ENSMUSG00000040883.17	3170.6	0.446548	0.0878777	5.08147	3.74527e-07	3.54431e-06
Prpf39	protein_coding	ENSMUSG00000035597.19	4759.07	0.4465	0.0991879	4.50155	6.74596e-06	5.1301e-05
Fuom	protein_coding	ENSMUSG00000025466.19	1259.89	0.445987	0.11159	3.99665	6.42439e-05	0.000403655
Yars	protein_coding	ENSMUSG00000028811.11	66714.7	0.445601	0.0740897	6.01434	1.80624e-09	2.3484e-08
Poln	protein_coding	ENSMUSG00000045102.12	1008.89	0.445245	0.120249	3.70268	0.000213336	0.00118775
Gripap1	protein_coding	ENSMUSG00000031153.16	3442.8	0.445227	0.0878988	5.06522	4.07922e-07	3.83086e-06
Ngfrap1	protein_coding	ENSMUSG00000046432.12	26359.4	0.445113	0.0945985	4.70528	2.53516e-06	2.07904e-05
Wbscr27	protein_coding	ENSMUSG00000040557.14	2489.05	0.445089	0.0901814	4.93548	7.99524e-07	7.14284e-06
Abcb1b	protein_coding	ENSMUSG00000028970.9	2545.99	0.445047	0.10071	4.41909	9.91166e-06	7.3188e-05
Cct8	protein_coding	ENSMUSG00000025613.13	150995	0.444817	0.0841335	5.28704	1.24308e-07	1.26343e-06
Lmo4	protein_coding	ENSMUSG00000028266.17	3861.97	0.444791	0.0975512	4.55957	5.12597e-06	3.97561e-05
Surf2	protein_coding	ENSMUSG00000014873.15	7778.59	0.444257	0.0948548	4.68355	2.81953e-06	2.29388e-05
Slc26a11	protein_coding	ENSMUSG00000039908.14	1078.78	0.444083	0.112719	3.93973	8.15745e-05	0.000498655
Bin1	protein_coding	ENSMUSG00000024381.15	2228.71	0.44383	0.091507	4.85024	1.23314e-06	1.06754e-05
Ctbs	protein_coding	ENSMUSG00000028189.12	550.935	0.443765	0.140056	3.16848	0.00153237	0.00682143
Sc5d	protein_coding	ENSMUSG00000032018.14	8690.7	0.443727	0.080528	5.51022	3.58392e-08	3.93542e-07
Alas1	protein_coding	ENSMUSG00000032786.16	7124.13	0.443449	0.0843046	5.26008	1.43994e-07	1.44914e-06
Asna1	protein_coding	ENSMUSG00000052456.9	50634.4	0.443357	0.0895664	4.95004	7.41973e-07	6.65044e-06
Wdr81	protein_coding	ENSMUSG00000045374.18	4602.47	0.442902	0.0835752	5.29944	1.16156e-07	1.18695e-06
Inpp1	protein_coding	ENSMUSG00000026102.9	952.276	0.442712	0.121859	3.63299	0.000280152	0.00151647
Klhl22	protein_coding	ENSMUSG00000022750.18	25524.2	0.442523	0.0700408	6.31808	2.64837e-10	3.78342e-09
Ero1l	protein_coding	ENSMUSG00000021831.9	8740.43	0.442318	0.0780912	5.66412	1.47783e-08	1.72117e-07
Pik3r2	protein_coding	ENSMUSG00000031834.15	17543.6	0.441565	0.0792688	5.57047	2.54056e-08	2.85085e-07
Os9	protein_coding	ENSMUSG00000040462.13	7876.06	0.441356	0.079198	5.57281	2.50663e-08	2.81664e-07
Pdgfrl	protein_coding	ENSMUSG00000031595.9	989.568	0.441291	0.112952	3.90687	9.34977e-05	0.000564799
Sarm1	protein_coding	ENSMUSG00000050132.13	3538.07	0.441237	0.089563	4.92655	8.36947e-07	7.4555e-06
Mcm5	protein_coding	ENSMUSG00000005410.6	139025	0.44101	0.0847412	5.2042	1.94835e-07	1.92533e-06
Bbs7	protein_coding	ENSMUSG00000037325.10	819.63	0.440914	0.134976	3.26662	0.0010884	0.00506041
Mettl9	protein_coding	ENSMUSG00000030876.7	7015.67	0.440873	0.0744527	5.92152	3.18984e-09	4.01564e-08
Lamb2	protein_coding	ENSMUSG00000052911.9	9049.88	0.440828	0.075353	5.85017	4.91065e-09	6.0175e-08
Sphk2	protein_coding	ENSMUSG00000057342.15	9687.17	0.440598	0.0853852	5.16012	2.46794e-07	2.39262e-06
Actr10	protein_coding	ENSMUSG00000021076.6	11638.6	0.440268	0.0879911	5.00355	5.62829e-07	5.14605e-06
Exosc10	protein_coding	ENSMUSG00000017264.16	27134.8	0.440208	0.0669135	6.57875	4.74413e-11	7.39519e-10
Dbt	protein_coding	ENSMUSG00000000340.10	8025.82	0.439834	0.0731013	6.01677	1.77934e-09	2.31587e-08
Cyb5b	protein_coding	ENSMUSG00000031924.4	58433.4	0.439796	0.065214	6.74388	1.54211e-11	2.531e-10
Fam228a	protein_coding	ENSMUSG00000079177.4	694.205	0.439197	0.137962	3.18346	0.00145526	0.00652663
P4ha2	protein_coding	ENSMUSG00000018906.14	935.664	0.439065	0.118184	3.71511	0.000203119	0.00113652
Bnip1	protein_coding	ENSMUSG00000024191.14	4028.87	0.438548	0.0957431	4.58046	4.63946e-06	3.6292e-05
Efnb1	protein_coding	ENSMUSG00000031217.8	830.933	0.438463	0.112478	3.8982	9.69097e-05	0.000584406
Espn	protein_coding	ENSMUSG00000028943.18	1258.56	0.438266	0.0986231	4.44384	8.83654e-06	6.5636e-05
Naa25	protein_coding	ENSMUSG00000042719.17	20587.2	0.437125	0.067304	6.49478	8.31537e-11	1.25501e-09
Rpe	protein_coding	ENSMUSG00000026005.15	12918.8	0.437095	0.0694724	6.29163	3.1415e-10	4.45426e-09
Mrpl9	protein_coding	ENSMUSG00000028140.13	10548.1	0.436786	0.0923031	4.73209	2.22224e-06	1.83836e-05
Nob1	protein_coding	ENSMUSG00000003848.14	14481.3	0.436678	0.0893279	4.88848	1.01616e-06	8.90985e-06
Zbtb8os	protein_coding	ENSMUSG00000057572.15	6788.03	0.43663	0.0824907	5.29308	1.2027e-07	1.22645e-06
Slc35f3	protein_coding	ENSMUSG00000057060.7	10591.6	0.436124	0.126563	3.4459	0.000569171	0.00286579
Ckap4	protein_coding	ENSMUSG00000046841.5	29942.1	0.435843	0.0758541	5.7458	9.14856e-09	1.09082e-07
Mcfd2	protein_coding	ENSMUSG00000024150.11	9016.56	0.435646	0.0832377	5.23376	1.66097e-07	1.65935e-06
Slc46a1	protein_coding	ENSMUSG00000020829.9	3562.86	0.43515	0.0880314	4.94312	7.68818e-07	6.88101e-06
Cmtm7	protein_coding	ENSMUSG00000032436.17	20872.7	0.43483	0.0721961	6.02291	1.71308e-09	2.23674e-08
Bcam	protein_coding	ENSMUSG00000002980.14	15532.5	0.434813	0.0729598	5.95963	2.52811e-09	3.21719e-08
Ilkap	protein_coding	ENSMUSG00000026309.14	15414.8	0.434809	0.0774782	5.61202	1.99982e-08	2.28687e-07
Tspan2	protein_coding	ENSMUSG00000027858.13	1468.8	0.434805	0.120874	3.59716	0.000321707	0.0017187
Bdh2	protein_coding	ENSMUSG00000028167.15	1494.97	0.434782	0.0999844	4.3485	1.37074e-05	9.80537e-05
Ndufb2	protein_coding	ENSMUSG00000002416.13	4696.74	0.43475	0.100348	4.33244	1.47466e-05	0.000104726
Hspa4l	protein_coding	ENSMUSG00000025757.12	704.006	0.434681	0.124008	3.50527	0.000456139	0.00235157
Nceh1	protein_coding	ENSMUSG00000027698.14	6093.14	0.434405	0.0748361	5.80476	6.44598e-09	7.80694e-08
Gne	protein_coding	ENSMUSG00000028479.18	6005.24	0.433601	0.0825347	5.25356	1.4919e-07	1.49958e-06
Pnrc2	protein_coding	ENSMUSG00000028675.12	11292.9	0.433385	0.081135	5.34153	9.21649e-08	9.5369e-07
Psmc6	protein_coding	ENSMUSG00000021832.8	36203.5	0.433105	0.0891907	4.85595	1.19814e-06	1.03913e-05
Kcnk6	protein_coding	ENSMUSG00000046410.10	573.207	0.432778	0.135934	3.18373	0.00145389	0.00652214
Acot9	protein_coding	ENSMUSG00000025287.15	13587.8	0.432745	0.0859784	5.03318	4.82412e-07	4.47569e-06
Slc23a2	protein_coding	ENSMUSG00000027340.15	10590.9	0.432738	0.0950228	4.55404	5.26249e-06	4.0725e-05
Zfp275	protein_coding	ENSMUSG00000031365.13	5168.16	0.432449	0.0935495	4.62268	3.78818e-06	3.0073e-05
Ppa1	protein_coding	ENSMUSG00000020089.8	53663.3	0.432416	0.0903135	4.78794	1.68498e-06	1.42802e-05
Pts	protein_coding	ENSMUSG00000032067.6	1575.71	0.432133	0.11114	3.88817	0.000101002	0.000605371
Xpot	protein_coding	ENSMUSG00000034667.8	72944	0.431062	0.0634666	6.79196	1.10623e-11	1.84018e-10
Rfxank	protein_coding	ENSMUSG00000036120.10	2351.63	0.43103	0.100999	4.26765	1.97546e-05	0.000137628
Zfp772	protein_coding	ENSMUSG00000066838.7	1346.98	0.430535	0.101163	4.25585	2.08259e-05	0.000144192
Pgls	protein_coding	ENSMUSG00000031807.10	12971.4	0.430452	0.0754872	5.70232	1.1819e-08	1.39367e-07
Adk	protein_coding	ENSMUSG00000039197.10	11018.3	0.430446	0.0736459	5.84481	5.07152e-09	6.19416e-08
Kdelc2	protein_coding	ENSMUSG00000034487.4	2395.25	0.43005	0.0866895	4.96081	7.02004e-07	6.31521e-06
Triap1	protein_coding	ENSMUSG00000029535.4	4554.24	0.429813	0.0849949	5.05693	4.26069e-07	3.98605e-06
Pnrc1	protein_coding	ENSMUSG00000040128.9	3839.8	0.429655	0.0855308	5.02339	5.07661e-07	4.68168e-06
Phf14	protein_coding	ENSMUSG00000029629.17	10717.7	0.429022	0.0685511	6.25844	3.88857e-10	5.44755e-09
Stx4a	protein_coding	ENSMUSG00000030805.14	2899.64	0.428992	0.0984412	4.35785	1.31344e-05	9.43944e-05
Stk24	protein_coding	ENSMUSG00000063410.8	17766.6	0.42851	0.0887016	4.83091	1.35909e-06	1.16834e-05
Gtpbp6	protein_coding	ENSMUSG00000033434.15	3042.09	0.427812	0.0951451	4.49642	6.91067e-06	5.24238e-05
Adi1	protein_coding	ENSMUSG00000020629.12	7614.37	0.427668	0.098133	4.35804	1.31232e-05	9.43415e-05
Ddx27	protein_coding	ENSMUSG00000017999.16	45846.6	0.427588	0.102094	4.18818	2.81199e-05	0.000189933
Junb	protein_coding	ENSMUSG00000052837.6	4107.7	0.427388	0.105665	4.04474	5.23818e-05	0.000334075
Mtus2	protein_coding	ENSMUSG00000029651.16	3827.97	0.427284	0.0856393	4.98934	6.05845e-07	5.51883e-06
Pex2	protein_coding	ENSMUSG00000040374.13	850.109	0.426822	0.115865	3.6838	0.000229783	0.00127211
Ndc80	protein_coding	ENSMUSG00000024056.9	12152.2	0.426562	0.0847724	5.03185	4.85781e-07	4.50016e-06
Spry4	protein_coding	ENSMUSG00000024427.6	41929.8	0.426413	0.135512	3.14669	0.00165129	0.00727313
Ier2	protein_coding	ENSMUSG00000053560.4	24828.5	0.42629	0.101937	4.1819	2.89089e-05	0.000194674
Sbds	protein_coding	ENSMUSG00000025337.10	11405.4	0.426276	0.0761622	5.59696	2.18149e-08	2.47618e-07
Tmem59	protein_coding	ENSMUSG00000028618.11	10316.9	0.425632	0.0725567	5.8662	4.45884e-09	5.50051e-08
Aldh18a1	protein_coding	ENSMUSG00000025007.13	40544.8	0.425385	0.0683729	6.22155	4.92275e-10	6.79948e-09
Asns	protein_coding	ENSMUSG00000029752.12	140189	0.425384	0.0868914	4.89558	9.80159e-07	8.62189e-06
Ik	protein_coding	ENSMUSG00000024474.6	26267.7	0.425226	0.10732	3.96224	7.42512e-05	0.00045995
Fam118a	protein_coding	ENSMUSG00000022434.8	6190.11	0.424455	0.0738019	5.75128	8.85704e-09	1.0576e-07
Cyth2	protein_coding	ENSMUSG00000003269.17	13810.3	0.424343	0.081135	5.23009	1.6943e-07	1.6899e-06
Atp6v1d	protein_coding	ENSMUSG00000021114.9	12501.6	0.424341	0.0924105	4.59191	4.3921e-06	3.44667e-05
Pgam1	protein_coding	ENSMUSG00000011752.6	107672	0.424217	0.0776337	5.46434	4.64623e-08	5.02562e-07
Mif	protein_coding	ENSMUSG00000033307.7	71111.3	0.423991	0.0871824	4.86327	1.15463e-06	1.00488e-05
Efhd2	protein_coding	ENSMUSG00000040659.3	3690.3	0.423795	0.107263	3.951	7.78244e-05	0.000478827
Triml2	protein_coding	ENSMUSG00000091490.3	41618.1	0.42301	0.071819	5.88995	3.86314e-09	4.79693e-08
Sync	protein_coding	ENSMUSG00000001333.9	1159.05	0.422797	0.113874	3.71284	0.000204946	0.0011452
Simc1	protein_coding	ENSMUSG00000043183.18	3448.74	0.422642	0.0981892	4.30436	1.67468e-05	0.000118044
Yrdc	protein_coding	ENSMUSG00000028889.17	12907.1	0.421983	0.0905895	4.65818	3.19013e-06	2.57412e-05
Kif23	protein_coding	ENSMUSG00000032254.10	21898.8	0.421715	0.0659513	6.39434	1.61246e-10	2.34857e-09
Tubd1	protein_coding	ENSMUSG00000020513.15	1251.61	0.421433	0.119212	3.53516	0.000407529	0.00212611
Dnajc18	protein_coding	ENSMUSG00000024350.5	5607.55	0.421322	0.0829997	5.07619	3.8508e-07	3.6316e-06
Gjb3	protein_coding	ENSMUSG00000042367.12	22114.3	0.42125	0.0760626	5.5382	3.05596e-08	3.39778e-07
Pdpn	protein_coding	ENSMUSG00000028583.14	819.595	0.420956	0.135942	3.09659	0.00195762	0.00844536
Dscc1	protein_coding	ENSMUSG00000022422.13	1832.25	0.420253	0.0980508	4.28608	1.81858e-05	0.0001275
Shprh	protein_coding	ENSMUSG00000090112.8	17843.2	0.419896	0.0725752	5.78567	7.22235e-09	8.70434e-08
Mid1ip1	protein_coding	ENSMUSG00000008035.12	2639.01	0.419818	0.107169	3.91734	8.95324e-05	0.000543383
Ppp4r2	protein_coding	ENSMUSG00000052144.8	30967.7	0.419741	0.0668033	6.28325	3.31576e-10	4.69322e-09
Atic	protein_coding	ENSMUSG00000026192.13	63411.9	0.419215	0.0766674	5.46797	4.55224e-08	4.92612e-07
Trp53bp1	protein_coding	ENSMUSG00000043909.16	10781.2	0.419208	0.0907414	4.61981	3.841e-06	3.04432e-05
Armc6	protein_coding	ENSMUSG00000002343.11	9215.96	0.418706	0.0902974	4.63697	3.53551e-06	2.82313e-05
Nup205	protein_coding	ENSMUSG00000038759.15	71403.9	0.417898	0.0636434	6.56625	5.15993e-11	7.99382e-10
Vps26a	protein_coding	ENSMUSG00000020078.16	17228.7	0.417135	0.0798828	5.22184	1.77154e-07	1.76265e-06
Ppip5k1	protein_coding	ENSMUSG00000033526.16	5410.82	0.41705	0.0915856	4.55367	5.27189e-06	4.0785e-05
Sh2b3	protein_coding	ENSMUSG00000042594.16	4982.95	0.416871	0.0853728	4.88295	1.04509e-06	9.15053e-06
Dnajc3	protein_coding	ENSMUSG00000022136.8	11537.4	0.416486	0.0672056	6.1972	5.74783e-10	7.91243e-09
Ncs1	protein_coding	ENSMUSG00000062661.6	3227.2	0.416416	0.0794798	5.23926	1.61218e-07	1.61454e-06
Ebna1bp2	protein_coding	ENSMUSG00000028729.15	41420.8	0.416318	0.0986941	4.21827	2.46187e-05	0.000168836
Med24	protein_coding	ENSMUSG00000017210.14	25968.9	0.416315	0.0711501	5.85122	4.8797e-09	5.98366e-08
Nusap1	protein_coding	ENSMUSG00000027306.15	17624.1	0.416209	0.0838325	4.96477	6.87819e-07	6.20805e-06
Bcl2l14	protein_coding	ENSMUSG00000030200.13	679.709	0.416072	0.126651	3.28519	0.00101912	0.00478079
Rfesd	protein_coding	ENSMUSG00000043190.14	922.753	0.415831	0.131773	3.15567	0.00160128	0.00707438
Camk1	protein_coding	ENSMUSG00000030272.15	1173.75	0.415552	0.123823	3.35602	0.000790731	0.00382319
Ccdc30	protein_coding	ENSMUSG00000028637.15	1901.95	0.415493	0.0950058	4.37334	1.2236e-05	8.8377e-05
Mia2	protein_coding	ENSMUSG00000021000.16	16557.8	0.415467	0.0751899	5.52556	3.2843e-08	3.63402e-07
Hmbs	protein_coding	ENSMUSG00000032126.16	18634	0.415446	0.0873898	4.75394	1.99491e-06	1.6643e-05
Zfp12	protein_coding	ENSMUSG00000029587.16	7758.01	0.415317	0.0813208	5.10715	3.27052e-07	3.11662e-06
Rbm3	protein_coding	ENSMUSG00000031167.16	41792	0.415238	0.0867902	4.78439	1.71508e-06	1.45253e-05
RP24-132A22.2	protein_coding	ENSMUSG00000078932.8	1212.12	0.41506	0.113273	3.66425	0.000248063	0.00136227
Uchl3	protein_coding	ENSMUSG00000022111.9	14640.3	0.414983	0.0670654	6.18773	6.10365e-10	8.38348e-09
Haus8	protein_coding	ENSMUSG00000035439.13	10949	0.414631	0.0849447	4.88118	1.05451e-06	9.22643e-06
Nek1	protein_coding	ENSMUSG00000031644.19	4887.26	0.414591	0.113743	3.64497	0.000267426	0.00145335
Klhl26	protein_coding	ENSMUSG00000055707.13	6046.32	0.414444	0.0844256	4.90898	9.15522e-07	8.09386e-06
Dusp6	protein_coding	ENSMUSG00000019960.8	15323.5	0.414132	0.0762659	5.43011	5.63198e-08	6.01772e-07
Snx2	protein_coding	ENSMUSG00000034484.7	21701.1	0.413812	0.0808021	5.1213	3.03431e-07	2.90504e-06
Triml1	protein_coding	ENSMUSG00000031651.5	18754.6	0.413424	0.077967	5.30255	1.14195e-07	1.16935e-06
Casp3	protein_coding	ENSMUSG00000031628.9	12531	0.413202	0.0806483	5.1235	2.99908e-07	2.87356e-06
Ccdc115	protein_coding	ENSMUSG00000042111.9	6755.86	0.413083	0.0919806	4.49097	7.08979e-06	5.36998e-05
Naca	protein_coding	ENSMUSG00000061315.14	137334	0.413067	0.0994757	4.15244	3.28953e-05	0.000218703
Rps27	protein_coding	ENSMUSG00000090733.6	111159	0.412265	0.115202	3.57864	0.000345383	0.00183206
Mast3	protein_coding	ENSMUSG00000031833.10	5887.41	0.412191	0.122226	3.37237	0.000745236	0.00362929
Dedd2	protein_coding	ENSMUSG00000054499.9	5320.16	0.411996	0.0893082	4.61319	3.96533e-06	3.13679e-05
Fam96a	protein_coding	ENSMUSG00000032381.5	9442.54	0.41153	0.0887424	4.63735	3.52902e-06	2.81886e-05
Vasp	protein_coding	ENSMUSG00000030403.9	34729.1	0.411222	0.0874494	4.7024	2.57127e-06	2.10724e-05
Fam129c	protein_coding	ENSMUSG00000043243.15	1073.72	0.409849	0.107399	3.81615	0.00013555	0.000787855
Kifap3	protein_coding	ENSMUSG00000026585.13	8285.27	0.409573	0.0684249	5.98573	2.15419e-09	2.76713e-08
Usp40	protein_coding	ENSMUSG00000005501.14	5951.3	0.409472	0.0859771	4.76257	1.91144e-06	1.60118e-05
Ubxn4	protein_coding	ENSMUSG00000026353.9	15903.6	0.409397	0.0923708	4.4321	9.33178e-06	6.91057e-05
RP23-233B6.2	protein_coding	ENSMUSG00000034560.6	22035.6	0.409234	0.0655528	6.24282	4.29757e-10	6e-09
Ept1	protein_coding	ENSMUSG00000075703.15	8269.48	0.409159	0.076396	5.35577	8.51937e-08	8.85654e-07
Sgcb	protein_coding	ENSMUSG00000029156.11	921.824	0.409018	0.114041	3.58658	0.000335042	0.00178182
Zfp553	protein_coding	ENSMUSG00000045598.10	34841.3	0.408426	0.0834158	4.89627	9.76722e-07	8.59781e-06
Tmem184c	protein_coding	ENSMUSG00000031617.16	5691.21	0.408164	0.0802155	5.08834	3.61215e-07	3.4236e-06
Wdr48	protein_coding	ENSMUSG00000032512.7	894.578	0.407913	0.119397	3.41644	0.000634458	0.00314809
Grb7	protein_coding	ENSMUSG00000019312.10	3402.39	0.407898	0.108692	3.75279	0.000174875	0.00099226
Sub1	protein_coding	ENSMUSG00000022205.15	47304.3	0.407105	0.105156	3.87144	0.000108194	0.000644705
44447	protein_coding	ENSMUSG00000018398.18	3295.52	0.407069	0.0926154	4.39526	1.10641e-05	8.07426e-05
Tmem51	protein_coding	ENSMUSG00000040616.3	6774.62	0.406965	0.081308	5.00523	5.57952e-07	5.10905e-06
Tm9sf2	protein_coding	ENSMUSG00000025544.13	31738.2	0.406964	0.0651847	6.24325	4.28581e-10	5.98699e-09
Ctsz	protein_coding	ENSMUSG00000016256.10	13814	0.40694	0.0777013	5.23723	1.63003e-07	1.63043e-06
Kctd21	protein_coding	ENSMUSG00000044952.5	1203.41	0.406896	0.115366	3.52702	0.000420271	0.00218498
Zfp661	protein_coding	ENSMUSG00000034800.15	2267.78	0.406895	0.0981954	4.14372	3.41712e-05	0.00022639
Trmo	protein_coding	ENSMUSG00000028331.12	6021.69	0.406777	0.0882307	4.61038	4.0194e-06	3.17344e-05
Cfdp1	protein_coding	ENSMUSG00000031954.6	40547	0.406738	0.116199	3.50036	0.000464629	0.00239083
Supt5	protein_coding	ENSMUSG00000003435.9	31240.6	0.406711	0.0937365	4.33888	1.43213e-05	0.00010197
Apba3	protein_coding	ENSMUSG00000004931.11	12296.1	0.406527	0.086805	4.68321	2.82413e-06	2.2961e-05
Tmem81	protein_coding	ENSMUSG00000048174.2	1631.2	0.406457	0.114957	3.53573	0.000406652	0.00212316
Ppfia3	protein_coding	ENSMUSG00000003863.18	3091.62	0.406187	0.0874119	4.64681	3.37106e-06	2.70764e-05
Nit2	protein_coding	ENSMUSG00000022751.9	10947	0.406054	0.0852922	4.76075	1.92876e-06	1.61404e-05
Crtc1	protein_coding	ENSMUSG00000003575.13	3170.91	0.405841	0.111949	3.62522	0.00028872	0.00155737
Hnf1a	protein_coding	ENSMUSG00000029556.12	888.159	0.405781	0.12628	3.21333	0.00131205	0.00597483
RP23-100C7.2	protein_coding	ENSMUSG00000046312.4	7742.26	0.405712	0.0758899	5.34607	8.98859e-08	9.31283e-07
Arrdc1	protein_coding	ENSMUSG00000026972.15	1336.23	0.405676	0.0963931	4.20855	2.57009e-05	0.000175231
Spp1	protein_coding	ENSMUSG00000029304.14	77972.5	0.405246	0.0880302	4.60349	4.15478e-06	3.27402e-05
Tulp2	protein_coding	ENSMUSG00000023467.18	2286.65	0.404987	0.0843395	4.80186	1.57197e-06	1.33917e-05
Dcaf11	protein_coding	ENSMUSG00000022214.15	4481.49	0.404955	0.0765311	5.29138	1.21398e-07	1.23539e-06
Spopl	protein_coding	ENSMUSG00000026771.14	8338.41	0.404851	0.0808838	5.00534	5.57641e-07	5.10811e-06
Rubcn	protein_coding	ENSMUSG00000035629.18	6110.4	0.404243	0.0765748	5.27906	1.2985e-07	1.31541e-06
Msh3	protein_coding	ENSMUSG00000014850.15	13477.3	0.404091	0.0704093	5.73917	9.51406e-09	1.13165e-07
Ube2c	protein_coding	ENSMUSG00000001403.13	29002	0.404076	0.0923714	4.37447	1.21729e-05	8.79728e-05
Bsn	protein_coding	ENSMUSG00000032589.14	898.156	0.403933	0.124301	3.24963	0.00115555	0.0053393
Tmem47	protein_coding	ENSMUSG00000025666.16	1476.24	0.403384	0.101811	3.96207	7.43015e-05	0.000460145
Shisa5	protein_coding	ENSMUSG00000025647.16	6147.43	0.403316	0.0961095	4.19642	2.71169e-05	0.000183899
Pbxip1	protein_coding	ENSMUSG00000042613.9	5074.5	0.403217	0.094071	4.28631	1.81669e-05	0.000127432
Hspe1	protein_coding	ENSMUSG00000073676.4	64854.2	0.403043	0.111779	3.60571	0.000311299	0.00166927
Esd	protein_coding	ENSMUSG00000021996.16	10530.5	0.403013	0.0842451	4.78381	1.72001e-06	1.4562e-05
Cldn34c1	protein_coding	ENSMUSG00000079450.11	7375.02	0.403006	0.0807055	4.99354	5.92821e-07	5.4082e-06
Tuba4a	protein_coding	ENSMUSG00000026202.13	37542.1	0.402978	0.0818783	4.92167	8.5807e-07	7.62708e-06
Ctnna1	protein_coding	ENSMUSG00000037815.6	108191	0.402975	0.0651676	6.18367	6.2628e-10	8.59247e-09
Igfals	protein_coding	ENSMUSG00000046070.8	936.977	0.402904	0.111128	3.62559	0.000288306	0.00155616
Whamm	protein_coding	ENSMUSG00000045795.10	2804.45	0.402194	0.0957684	4.19965	2.6733e-05	0.000181713
Tpp1	protein_coding	ENSMUSG00000030894.5	8471.64	0.402121	0.110194	3.64923	0.000263031	0.00143294
Hsbp1	protein_coding	ENSMUSG00000031839.7	10639.2	0.401974	0.103197	3.8952	9.8119e-05	0.000590551
Atg9a	protein_coding	ENSMUSG00000033124.15	2448.52	0.401911	0.0926327	4.33876	1.43291e-05	0.000101996
Pnp	protein_coding	ENSMUSG00000115338.2	1145.21	0.401776	0.126618	3.17313	0.00150807	0.00672546
Tmem39a	protein_coding	ENSMUSG00000002845.14	23560.5	0.40177	0.0654146	6.1419	8.1538e-10	1.09906e-08
Top2b	protein_coding	ENSMUSG00000017485.11	16250.9	0.401767	0.0806018	4.98459	6.20943e-07	5.6459e-06
Exoc7	protein_coding	ENSMUSG00000020792.15	6687.89	0.401682	0.0774513	5.18625	2.1457e-07	2.1026e-06
Loxl3	protein_coding	ENSMUSG00000000693.10	677.624	0.40109	0.122162	3.28327	0.00102611	0.00480805
Cdc25c	protein_coding	ENSMUSG00000044201.9	6621.4	0.400632	0.0913348	4.38642	1.15233e-05	8.37213e-05
Pkm	protein_coding	ENSMUSG00000032294.17	640036	0.400217	0.076773	5.21299	1.85822e-07	1.84441e-06
Dpm2	protein_coding	ENSMUSG00000026810.12	5443.62	0.399785	0.11283	3.54325	0.000395235	0.00206838
Tmem237	protein_coding	ENSMUSG00000038079.14	3493.45	0.399768	0.0815973	4.89928	9.61862e-07	8.4761e-06
Rrp9	protein_coding	ENSMUSG00000041506.15	34118.2	0.399388	0.097612	4.09159	4.28429e-05	0.000278292
Scamp2	protein_coding	ENSMUSG00000040188.10	7530.2	0.399244	0.0768363	5.19603	2.03586e-07	2.00615e-06
Cdh24	protein_coding	ENSMUSG00000059674.7	1697.8	0.39906	0.112604	3.54392	0.000394229	0.00206355
Pecam1	protein_coding	ENSMUSG00000020717.19	21806.5	0.39906	0.0704533	5.66418	1.4773e-08	1.72117e-07
Tbc1d7	protein_coding	ENSMUSG00000021368.15	1965.74	0.398363	0.10125	3.93445	8.33878e-05	0.00050898
Ofd1	protein_coding	ENSMUSG00000040586.8	8755.44	0.397893	0.0832584	4.77901	1.76163e-06	1.4853e-05
Dzip3	protein_coding	ENSMUSG00000064061.13	10212.7	0.397681	0.0791194	5.02634	4.99926e-07	4.619e-06
Eif5	protein_coding	ENSMUSG00000021282.17	60519.1	0.397673	0.0779479	5.10178	3.36466e-07	3.20509e-06
Armcx1	protein_coding	ENSMUSG00000033460.14	6868.18	0.397626	0.0882153	4.50745	6.56108e-06	5.00188e-05
Rab24	protein_coding	ENSMUSG00000034789.8	3413.39	0.397473	0.0891807	4.45694	8.3137e-06	6.21278e-05
Tmem234	protein_coding	ENSMUSG00000028797.20	16493.2	0.39728	0.082118	4.83792	1.31206e-06	1.12989e-05
Ngdn	protein_coding	ENSMUSG00000022204.9	15998.2	0.397171	0.0985609	4.0297	5.58485e-05	0.000354621
Dars2	protein_coding	ENSMUSG00000026709.10	15245.2	0.397122	0.0912561	4.35173	1.35066e-05	9.68143e-05
Tmem143	protein_coding	ENSMUSG00000002781.19	4573.54	0.396984	0.0876494	4.52923	5.91992e-06	4.54692e-05
Grhpr	protein_coding	ENSMUSG00000035637.14	13622.8	0.396744	0.0815265	4.86644	1.13625e-06	9.89226e-06
Bdh1	protein_coding	ENSMUSG00000046598.15	5682.34	0.396269	0.0832716	4.75875	1.94798e-06	1.62791e-05
Gnl2	protein_coding	ENSMUSG00000028869.13	25648.4	0.395902	0.0849888	4.65828	3.1886e-06	2.57412e-05
Klhl9	protein_coding	ENSMUSG00000070923.4	8099.29	0.394848	0.0833734	4.7359	2.1809e-06	1.80742e-05
Epha4	protein_coding	ENSMUSG00000026235.14	36223.9	0.394826	0.0726976	5.43107	5.60174e-08	5.98801e-07
Nubpl	protein_coding	ENSMUSG00000035142.18	2876.62	0.394645	0.0990554	3.98408	6.77421e-05	0.000423362
Snx8	protein_coding	ENSMUSG00000029560.12	7469.96	0.394582	0.0785481	5.02345	5.07526e-07	4.68168e-06
Npm1	protein_coding	ENSMUSG00000057113.13	652168	0.394081	0.102842	3.83191	0.000127153	0.000744681
Nt5dc1	protein_coding	ENSMUSG00000039480.14	1942.58	0.393756	0.102762	3.83173	0.000127245	0.000745047
Plcd1	protein_coding	ENSMUSG00000010660.3	6578.89	0.393531	0.0715652	5.49892	3.82126e-08	4.1811e-07
Stmn3	protein_coding	ENSMUSG00000027581.12	4797.8	0.39342	0.0954072	4.12358	3.73021e-05	0.000245348
Hmgxb4	protein_coding	ENSMUSG00000034518.14	11545.1	0.393383	0.0825948	4.7628	1.90922e-06	1.60005e-05
Oplah	protein_coding	ENSMUSG00000022562.15	1445.75	0.393031	0.0959961	4.09424	4.23558e-05	0.000275362
Fshr	protein_coding	ENSMUSG00000032937.4	4691.18	0.392825	0.101237	3.88024	0.000104353	0.000623176
St14	protein_coding	ENSMUSG00000031995.9	6317.16	0.392268	0.0742391	5.28384	1.26502e-07	1.28467e-06
Glud1	protein_coding	ENSMUSG00000021794.16	129458	0.392228	0.0673382	5.82475	5.71973e-09	6.9582e-08
Ccdc124	protein_coding	ENSMUSG00000007721.6	15134.8	0.392128	0.100339	3.90804	9.30475e-05	0.000562772
Foxred2	protein_coding	ENSMUSG00000016552.13	5231.22	0.391967	0.0821439	4.77171	1.82672e-06	1.53492e-05
Washc3	protein_coding	ENSMUSG00000020056.16	4369.78	0.391721	0.0878274	4.46012	8.1914e-06	6.12884e-05
Myo15b	protein_coding	ENSMUSG00000034427.17	590.126	0.391702	0.12797	3.06089	0.00220677	0.00936413
Zfp386	protein_coding	ENSMUSG00000042063.11	4539.74	0.391335	0.0981704	3.98629	6.71151e-05	0.000419764
Nphp1	protein_coding	ENSMUSG00000027378.16	2624.47	0.391084	0.0937562	4.17129	3.02884e-05	0.000202852
Tmem55b	protein_coding	ENSMUSG00000035953.14	12167.2	0.390854	0.0708747	5.51471	3.49349e-08	3.84472e-07
Pkd2l2	protein_coding	ENSMUSG00000014503.14	1868.67	0.390845	0.103397	3.78004	0.0001568	0.000900512
Rit1	protein_coding	ENSMUSG00000028057.14	2032.25	0.390584	0.103345	3.77943	0.000157186	0.000902514
Cdc45	protein_coding	ENSMUSG00000000028.15	19490.2	0.3903	0.0743037	5.25276	1.49833e-07	1.50543e-06
Snapin	protein_coding	ENSMUSG00000001018.15	6672.28	0.390293	0.0892127	4.37486	1.21512e-05	8.78417e-05
Ccdc8	protein_coding	ENSMUSG00000041117.8	2027.01	0.389849	0.113835	3.42468	0.000615531	0.0030678
Fam96b	protein_coding	ENSMUSG00000031879.14	6155.07	0.389848	0.119753	3.25542	0.00113223	0.00524831
Hdac8	protein_coding	ENSMUSG00000067567.12	1109.29	0.389806	0.113434	3.43642	0.000589453	0.00295339
Nub1	protein_coding	ENSMUSG00000028954.11	12857.6	0.389715	0.0855143	4.55732	5.18116e-06	4.01209e-05
AC114920.2	protein_coding	ENSMUSG00000038005.15	8283.77	0.389538	0.0698338	5.57808	2.4319e-08	2.74144e-07
Brap	protein_coding	ENSMUSG00000029458.14	9379.7	0.389469	0.0888188	4.38499	1.15992e-05	8.41979e-05
Atp6v1e1	protein_coding	ENSMUSG00000019210.10	19793.7	0.389058	0.086167	4.51516	6.32675e-06	4.83373e-05
Cpt2	protein_coding	ENSMUSG00000028607.16	3267.01	0.3889	0.0970954	4.00534	6.19283e-05	0.000390203
Gcdh	protein_coding	ENSMUSG00000003809.14	11224.5	0.388739	0.0895375	4.34163	1.41431e-05	0.000100877
Maats1	protein_coding	ENSMUSG00000022805.17	1847.97	0.38873	0.0994321	3.9095	9.24875e-05	0.000559936
Clspn	protein_coding	ENSMUSG00000042489.15	13980.6	0.38849	0.0749092	5.18615	2.14683e-07	2.10287e-06
Rpl6	protein_coding	ENSMUSG00000029614.13	337319	0.388418	0.0926625	4.19174	2.76819e-05	0.000187232
Slc7a3	protein_coding	ENSMUSG00000031297.14	42884	0.388057	0.0818381	4.74176	2.11866e-06	1.76037e-05
Slc39a3	protein_coding	ENSMUSG00000046822.12	2071.6	0.387829	0.100705	3.85112	0.000117578	0.000693894
Fcho1	protein_coding	ENSMUSG00000070000.13	7456.9	0.387791	0.0793084	4.88966	1.01012e-06	8.86004e-06
Dip2a	protein_coding	ENSMUSG00000020231.15	3287.71	0.387596	0.0951178	4.07491	4.60326e-05	0.000296893
Asf1b	protein_coding	ENSMUSG00000005470.8	13835.8	0.386936	0.0768892	5.03238	4.84427e-07	4.48931e-06
Opa3	protein_coding	ENSMUSG00000052214.9	12167.5	0.386931	0.0708728	5.45951	4.77443e-08	5.15295e-07
Abcf3	protein_coding	ENSMUSG00000003234.16	13955.8	0.386704	0.0741913	5.21226	1.86553e-07	1.85017e-06
Sarnp	protein_coding	ENSMUSG00000078427.3	26228.7	0.386433	0.0947801	4.07715	4.55908e-05	0.000294353
Ugp2	protein_coding	ENSMUSG00000001891.16	4477.94	0.3862	0.0763146	5.06063	4.17883e-07	3.91394e-06
Hsf2bp	protein_coding	ENSMUSG00000002076.11	18053.1	0.386181	0.0673291	5.73572	9.71017e-09	1.15386e-07
Ankzf1	protein_coding	ENSMUSG00000026199.17	6180.14	0.386127	0.0840469	4.59418	4.34457e-06	3.41155e-05
RP23-222G22.7	protein_coding	ENSMUSG00000030347.6	4421.61	0.386075	0.0837301	4.61095	4.0083e-06	3.1657e-05
Pcolce2	protein_coding	ENSMUSG00000015354.8	10547.9	0.386039	0.0782515	4.93331	8.08466e-07	7.21749e-06
Dut	protein_coding	ENSMUSG00000027203.15	39225.3	0.385621	0.0874319	4.41053	1.03119e-05	7.5748e-05
Mlx	protein_coding	ENSMUSG00000017801.15	9187.57	0.385226	0.101523	3.79446	0.000147966	0.000854366
Cep72	protein_coding	ENSMUSG00000021572.9	4523.9	0.385134	0.0776072	4.9626	6.95548e-07	6.26401e-06
Narf	protein_coding	ENSMUSG00000000056.7	6014.15	0.385004	0.0934067	4.1218	3.75922e-05	0.000247057
Rabep2	protein_coding	ENSMUSG00000030727.12	8536.42	0.384991	0.0811636	4.74339	2.10171e-06	1.74747e-05
Cyld	protein_coding	ENSMUSG00000036712.15	4336.14	0.38424	0.0847909	4.53162	5.85332e-06	4.5014e-05
Thrap3	protein_coding	ENSMUSG00000043962.16	75536.5	0.383836	0.0682539	5.62365	1.86964e-08	2.14699e-07
Otud4	protein_coding	ENSMUSG00000036990.13	56934.9	0.3835	0.0619205	6.19342	5.88709e-10	8.09508e-09
Nudc	protein_coding	ENSMUSG00000028851.6	78329.9	0.383342	0.105032	3.64976	0.000262485	0.00143061
Apobec1	protein_coding	ENSMUSG00000040613.14	1471.47	0.38331	0.117076	3.27404	0.00106023	0.00494535
Idnk	protein_coding	ENSMUSG00000050002.14	1555.32	0.383069	0.0974428	3.93122	8.45168e-05	0.000515488
Sacs	protein_coding	ENSMUSG00000048279.19	9942.95	0.382362	0.0984425	3.88411	0.000102704	0.000614073
Atf6	protein_coding	ENSMUSG00000026663.6	9705.55	0.382232	0.0895802	4.26693	1.98186e-05	0.000137995
Taz	protein_coding	ENSMUSG00000009995.17	5423.88	0.382187	0.0933367	4.09472	4.22684e-05	0.000274924
Zfp655	protein_coding	ENSMUSG00000007812.16	17799	0.38214	0.0697036	5.48236	4.19699e-08	4.55774e-07
Ndst2	protein_coding	ENSMUSG00000039308.6	2997.98	0.382112	0.0931258	4.10318	4.07503e-05	0.000266035
Zfp605	protein_coding	ENSMUSG00000023284.15	2299.47	0.382006	0.0907181	4.21092	2.54338e-05	0.000173651
Znrd1	protein_coding	ENSMUSG00000036315.13	8939.88	0.38199	0.0896554	4.26065	2.03837e-05	0.000141649
Sh3yl1	protein_coding	ENSMUSG00000020669.15	752.706	0.381905	0.120442	3.17086	0.00151987	0.00676946
Hmgb1	protein_coding	ENSMUSG00000066551.12	61042.4	0.381787	0.112382	3.39722	0.000680752	0.00335008
Dnajc30	protein_coding	ENSMUSG00000061118.8	952.847	0.380877	0.113266	3.36268	0.000771902	0.00374172
Pnpla2	protein_coding	ENSMUSG00000025509.15	3032.18	0.380853	0.106547	3.5745	0.000350898	0.00185851
Cdo1	protein_coding	ENSMUSG00000033022.7	866.023	0.380701	0.12047	3.16014	0.00157695	0.00698701
Gatad2a	protein_coding	ENSMUSG00000036180.15	65853.1	0.380585	0.091168	4.17455	2.98578e-05	0.000200241
RP23-325I3.1	protein_coding	ENSMUSG00000027165.16	1356.29	0.380445	0.108881	3.49414	0.000475595	0.00244265
Dnah8	protein_coding	ENSMUSG00000033826.9	36878.9	0.38014	0.0962486	3.94956	7.82946e-05	0.000481238
Ttc27	protein_coding	ENSMUSG00000024078.6	20410	0.379465	0.0752748	5.04107	4.62943e-07	4.3097e-06
Tcea2	protein_coding	ENSMUSG00000059540.15	1126.96	0.379202	0.11393	3.32837	0.000873565	0.0041733
Snap29	protein_coding	ENSMUSG00000022765.10	4118.82	0.379085	0.0746237	5.07995	3.7754e-07	3.56733e-06
Hbld2	protein_coding	ENSMUSG00000078139.3	2309.88	0.379067	0.0923209	4.10597	4.0262e-05	0.000263196
Crip2	protein_coding	ENSMUSG00000006356.10	5557.89	0.379024	0.108498	3.49337	0.000476957	0.00244863
Tldc1	protein_coding	ENSMUSG00000034105.9	2877.19	0.378909	0.0954663	3.96904	7.2164e-05	0.00044781
Zfp94	protein_coding	ENSMUSG00000074282.10	1984.46	0.378756	0.105406	3.59331	0.000326504	0.00174131
Dolpp1	protein_coding	ENSMUSG00000026856.14	9496.07	0.378544	0.0820838	4.61167	3.99446e-06	3.15577e-05
Scrn3	protein_coding	ENSMUSG00000008226.14	2907.16	0.378418	0.0844674	4.48004	7.46278e-06	5.6334e-05
Trh	protein_coding	ENSMUSG00000005892.4	108108	0.378152	0.085721	4.41142	1.02693e-05	7.55253e-05
Faap24	protein_coding	ENSMUSG00000030493.13	2881.92	0.378103	0.0971107	3.89353	9.87967e-05	0.000593601
Slc16a1	protein_coding	ENSMUSG00000032902.1	40897.4	0.37791	0.0701367	5.3882	7.11682e-08	7.49033e-07
Hspb1	protein_coding	ENSMUSG00000004951.10	81739.4	0.377839	0.0904956	4.17522	2.977e-05	0.000199816
Wars	protein_coding	ENSMUSG00000021266.16	32697	0.37746	0.0688978	5.47855	4.28827e-08	4.65276e-07
Bcl7b	protein_coding	ENSMUSG00000029681.12	5236.16	0.377123	0.0905416	4.16519	3.11098e-05	0.000207788
Ankrd13a	protein_coding	ENSMUSG00000041870.16	28526	0.376914	0.065078	5.79173	6.96659e-09	8.40847e-08
Pcyox1l	protein_coding	ENSMUSG00000024579.7	3121.86	0.376559	0.096744	3.89232	9.92882e-05	0.00059568
Ttf2	protein_coding	ENSMUSG00000033222.16	25702.7	0.376544	0.0693986	5.42582	5.76879e-08	6.15856e-07
Slc35f6	protein_coding	ENSMUSG00000029175.17	6657.04	0.375993	0.0802826	4.68337	2.82198e-06	2.29511e-05
Hspa13	protein_coding	ENSMUSG00000032932.15	7268.31	0.375855	0.0820139	4.58282	4.58746e-06	3.5931e-05
Arl6ip1	protein_coding	ENSMUSG00000030654.9	41006.7	0.375472	0.0736538	5.0978	3.43623e-07	3.26694e-06
Exoc3	protein_coding	ENSMUSG00000034152.6	14133.2	0.375442	0.074445	5.04322	4.5777e-07	4.26477e-06
Lyar	protein_coding	ENSMUSG00000067367.9	27452.4	0.375357	0.11408	3.29029	0.00100084	0.00470852
Rufy1	protein_coding	ENSMUSG00000020375.9	4313.37	0.375089	0.0913696	4.10518	4.03999e-05	0.000264028
Cab39l	protein_coding	ENSMUSG00000021981.10	5290.11	0.375044	0.0818469	4.58226	4.59983e-06	3.6014e-05
Gcc1	protein_coding	ENSMUSG00000029708.9	4103.56	0.374806	0.0773073	4.84826	1.2455e-06	1.07692e-05
Luc7l	protein_coding	ENSMUSG00000024188.15	34597.3	0.374459	0.0701317	5.33937	9.32683e-08	9.64295e-07
Myo18a	protein_coding	ENSMUSG00000000631.20	21513.7	0.373356	0.0913794	4.08578	4.3929e-05	0.000284896
Slc38a1	protein_coding	ENSMUSG00000023169.15	32868.9	0.373142	0.113375	3.29122	0.000997534	0.00469475
Acat3	protein_coding	ENSMUSG00000062480.11	6429.18	0.372869	0.0919077	4.05699	4.97085e-05	0.000318679
Esf1	protein_coding	ENSMUSG00000045624.15	20519.8	0.372645	0.0888253	4.19526	2.72563e-05	0.000184658
Hgh1	protein_coding	ENSMUSG00000022554.7	4984.44	0.372438	0.0782374	4.76036	1.93247e-06	1.61604e-05
Actb	protein_coding	ENSMUSG00000029580.14	538234	0.372326	0.083243	4.47276	7.72177e-06	5.81284e-05
Bivm	protein_coding	ENSMUSG00000041684.11	3792.08	0.37219	0.0936101	3.97597	7.00944e-05	0.000436178
Pard6a	protein_coding	ENSMUSG00000005699.16	2062.55	0.372057	0.103535	3.59352	0.000326239	0.00174027
Fam58b	protein_coding	ENSMUSG00000049489.5	3116.47	0.37194	0.101501	3.6644	0.000247924	0.00136181
Tpr	protein_coding	ENSMUSG00000006005.18	75800.4	0.371912	0.07053	5.2731	1.34138e-07	1.35605e-06
Xpnpep3	protein_coding	ENSMUSG00000022401.12	7054.51	0.37173	0.0899891	4.13083	3.61452e-05	0.000238376
Cd81	protein_coding	ENSMUSG00000037706.17	26564.2	0.371052	0.0686303	5.40654	6.42545e-08	6.81581e-07
Zfp110	protein_coding	ENSMUSG00000058638.14	27303.2	0.37088	0.079351	4.67392	2.95501e-06	2.39538e-05
Krtcap3	protein_coding	ENSMUSG00000029149.14	1165.16	0.370858	0.110532	3.35521	0.00079304	0.00383134
Wdr83	protein_coding	ENSMUSG00000005150.16	5802.43	0.370799	0.0863676	4.29327	1.76063e-05	0.000123819
Arel1	protein_coding	ENSMUSG00000042350.13	8219.26	0.370682	0.0709389	5.22538	1.73798e-07	1.73207e-06
Tbrg1	protein_coding	ENSMUSG00000011114.18	26341.9	0.370532	0.093527	3.96177	7.43973e-05	0.000460274
Hmgn2	protein_coding	ENSMUSG00000003038.15	18497.3	0.370281	0.0976405	3.79229	0.000149267	0.000860868
Specc1	protein_coding	ENSMUSG00000042331.13	1135.75	0.369864	0.112248	3.29507	0.000983959	0.00463974
Ikbip	protein_coding	ENSMUSG00000019975.12	2721.54	0.36972	0.0937209	3.94491	7.98312e-05	0.000489948
Washc2	protein_coding	ENSMUSG00000024104.11	27086.2	0.369415	0.0737805	5.00695	5.52981e-07	5.07109e-06
Psma2	protein_coding	ENSMUSG00000015671.11	50667.8	0.369177	0.0948382	3.89271	9.91313e-05	0.000594885
Acsbg2	protein_coding	ENSMUSG00000024207.8	967.076	0.368698	0.113935	3.23604	0.00121199	0.00557003
Pomk	protein_coding	ENSMUSG00000037251.5	3401.76	0.368527	0.0875229	4.21063	2.54658e-05	0.000173773
Pla2g10	protein_coding	ENSMUSG00000022683.13	959.263	0.368434	0.11181	3.29516	0.000983642	0.00463914
Kif11	protein_coding	ENSMUSG00000012443.3	49117.4	0.368404	0.0780675	4.71904	2.36956e-06	1.95104e-05
Snx6	protein_coding	ENSMUSG00000005656.9	10296.3	0.368236	0.071622	5.14137	2.72735e-07	2.62724e-06
Asl	protein_coding	ENSMUSG00000025533.15	7297.71	0.367432	0.0902505	4.07125	4.67612e-05	0.000301434
Odc1	protein_coding	ENSMUSG00000011179.8	158448	0.367305	0.08698	4.22286	2.41219e-05	0.000165613
Lrrc45	protein_coding	ENSMUSG00000025145.13	6201.56	0.367045	0.0773075	4.74785	2.05586e-06	1.71282e-05
Cldn12	protein_coding	ENSMUSG00000046798.14	9621.99	0.366687	0.0766859	4.78167	1.73844e-06	1.46966e-05
Pfkfb1	protein_coding	ENSMUSG00000025271.13	1249.86	0.366539	0.103655	3.53615	0.00040601	0.0021207
Calm2	protein_coding	ENSMUSG00000036438.12	55658.6	0.366438	0.0967794	3.78633	0.00015289	0.000879495
Plgrkt	protein_coding	ENSMUSG00000016495.12	1973	0.366042	0.109524	3.34211	0.000831453	0.0039926
Wrn	protein_coding	ENSMUSG00000031583.13	3518.16	0.365843	0.09204	3.97483	7.04306e-05	0.000437717
Vapa	protein_coding	ENSMUSG00000024091.8	32616.2	0.365821	0.0805756	4.5401	5.62278e-06	4.33496e-05
Emc10	protein_coding	ENSMUSG00000008140.17	12330	0.365337	0.0986423	3.70365	0.000212518	0.00118399
Cep135	protein_coding	ENSMUSG00000036403.15	6221.23	0.365091	0.0758458	4.81359	1.48241e-06	1.26682e-05
Fem1a	protein_coding	ENSMUSG00000043683.3	9420.23	0.364953	0.070275	5.19322	2.06687e-07	2.03346e-06
F8	protein_coding	ENSMUSG00000031196.13	3080.95	0.364392	0.101419	3.59294	0.000326965	0.00174297
Fem1b	protein_coding	ENSMUSG00000032244.9	63262	0.364226	0.0623664	5.84011	5.21679e-09	6.3621e-08
Pdcd7	protein_coding	ENSMUSG00000041837.4	7693.21	0.364102	0.0745838	4.88179	1.05127e-06	9.20129e-06
Qtrt1	protein_coding	ENSMUSG00000002825.8	12944.3	0.363998	0.0926384	3.92923	8.52188e-05	0.000518996
Hibch	protein_coding	ENSMUSG00000041426.12	4999.03	0.363888	0.0803099	4.53104	5.86928e-06	4.51085e-05
Zbed3	protein_coding	ENSMUSG00000041995.8	2466.87	0.363862	0.113515	3.20542	0.00134865	0.00611883
Ubl4a	protein_coding	ENSMUSG00000015290.15	5010.11	0.362876	0.0767761	4.72641	2.28519e-06	1.88536e-05
Dffb	protein_coding	ENSMUSG00000029027.9	2232.1	0.362693	0.0926292	3.91554	9.02016e-05	0.000547039
Cep162	protein_coding	ENSMUSG00000056919.9	6213.95	0.362303	0.0749586	4.83338	1.34238e-06	1.15519e-05
Lrrc41	protein_coding	ENSMUSG00000028703.14	5660.95	0.362275	0.0773228	4.68523	2.79645e-06	2.2766e-05
Lysmd4	protein_coding	ENSMUSG00000043831.12	1743.58	0.362262	0.100969	3.58787	0.000333391	0.00177342
Ensa	protein_coding	ENSMUSG00000038619.12	20029.8	0.362225	0.0894769	4.04826	5.16007e-05	0.000329663
Rps6ka2	protein_coding	ENSMUSG00000023809.10	21301.4	0.361966	0.0735908	4.91862	8.71543e-07	7.73845e-06
Ikbkg	protein_coding	ENSMUSG00000004221.16	6083.1	0.36192	0.073015	4.95679	7.16676e-07	6.43778e-06
Med17	protein_coding	ENSMUSG00000031935.9	19547.7	0.36177	0.0779562	4.64068	3.47266e-06	2.78017e-05
Cdk20	protein_coding	ENSMUSG00000021483.8	1385.61	0.361727	0.11443	3.16112	0.00157165	0.00697105
Tef	protein_coding	ENSMUSG00000022389.15	6665.1	0.361689	0.0754965	4.79081	1.66111e-06	1.40925e-05
Slc15a2	protein_coding	ENSMUSG00000022899.9	1248.13	0.361684	0.0977503	3.70008	0.000215528	0.00119913
Dnm1l	protein_coding	ENSMUSG00000022789.15	25104.5	0.361627	0.0686392	5.26851	1.37533e-07	1.38866e-06
Commd9	protein_coding	ENSMUSG00000027163.13	4936.3	0.361495	0.0901177	4.01136	6.03693e-05	0.000381455
Btf3	protein_coding	ENSMUSG00000021660.14	81643.1	0.360764	0.0914128	3.94654	7.92899e-05	0.000487112
Ssh2	protein_coding	ENSMUSG00000037926.15	21684.5	0.360732	0.0797847	4.52132	6.14543e-06	4.70397e-05
Cers2	protein_coding	ENSMUSG00000015714.11	11222	0.360491	0.0768254	4.69234	2.70097e-06	2.20691e-05
Galnt7	protein_coding	ENSMUSG00000031608.13	3608.89	0.360476	0.108985	3.30758	0.000941048	0.00446133
Idh3a	protein_coding	ENSMUSG00000032279.11	23356	0.360411	0.0699022	5.15594	2.52366e-07	2.44471e-06
Cdk4	protein_coding	ENSMUSG00000006728.12	115214	0.360409	0.0844828	4.26606	1.98952e-05	0.00013845
Zfp235	protein_coding	ENSMUSG00000047603.9	2919.57	0.36013	0.0979757	3.67571	0.000237192	0.00130666
Zfp551	protein_coding	ENSMUSG00000034071.15	960.476	0.360044	0.105971	3.39757	0.00067986	0.00334636
Fau	protein_coding	ENSMUSG00000038274.12	105374	0.359968	0.103694	3.47144	0.000517671	0.00263891
Fyco1	protein_coding	ENSMUSG00000025241.16	4737.37	0.359854	0.102232	3.51997	0.000431602	0.00223821
Stx1a	protein_coding	ENSMUSG00000007207.10	2038.73	0.359752	0.0909495	3.95551	7.63703e-05	0.000470469
RP23-343E20.2	protein_coding	ENSMUSG00000042742.7	4135.67	0.359546	0.0857854	4.19122	2.77453e-05	0.000187609
Sugp1	protein_coding	ENSMUSG00000011306.7	19097.7	0.359301	0.0776919	4.6247	3.75144e-06	2.98102e-05
Yif1a	protein_coding	ENSMUSG00000024875.4	7455.53	0.35914	0.0980723	3.66199	0.000250264	0.00137141
Adck5	protein_coding	ENSMUSG00000022550.18	4190.03	0.359023	0.0828506	4.33338	1.46837e-05	0.000104325
Rybp	protein_coding	ENSMUSG00000072872.3	27912.1	0.358997	0.0813144	4.41493	1.01044e-05	7.44019e-05
Fis1	protein_coding	ENSMUSG00000019054.13	14711.9	0.358221	0.0764828	4.68369	2.81762e-06	2.29308e-05
Atg12	protein_coding	ENSMUSG00000032905.4	7402.68	0.358165	0.0919506	3.89519	9.8121e-05	0.000590551
Epcam	protein_coding	ENSMUSG00000045394.8	5936.39	0.357929	0.0881404	4.0609	4.88838e-05	0.000313965
Itgb4	protein_coding	ENSMUSG00000020758.15	1618.31	0.357745	0.0919712	3.88976	0.000100345	0.000601729
Sf3b6	protein_coding	ENSMUSG00000037361.8	15966	0.357646	0.100753	3.54972	0.000385634	0.00202503
Ogg1	protein_coding	ENSMUSG00000030271.14	3010.29	0.357645	0.0930731	3.84262	0.000121726	0.000716481
Ctps	protein_coding	ENSMUSG00000028633.7	39975.8	0.35736	0.0749292	4.7693	1.84865e-06	1.55229e-05
Setd8	protein_coding	ENSMUSG00000049327.17	28240.6	0.357253	0.0691951	5.16298	2.43048e-07	2.36002e-06
Ift172	protein_coding	ENSMUSG00000038564.11	7504.61	0.357125	0.095765	3.72919	0.000192099	0.00108076
Rtn3	protein_coding	ENSMUSG00000024758.14	10897	0.357087	0.0997844	3.57858	0.000345467	0.00183211
Trim35	protein_coding	ENSMUSG00000022043.19	27391.8	0.357046	0.0719288	4.96387	6.91007e-07	6.22996e-06
Tomm40l	protein_coding	ENSMUSG00000005674.9	1924.7	0.356842	0.111296	3.20626	0.00134474	0.00610372
Stag2	protein_coding	ENSMUSG00000025862.14	14990.1	0.356683	0.0694652	5.1347	2.82599e-07	2.71617e-06
Ahcy	protein_coding	ENSMUSG00000027597.15	76628.6	0.35657	0.0775864	4.59578	4.31127e-06	3.38865e-05
Kif3c	protein_coding	ENSMUSG00000020668.10	948.351	0.356562	0.11608	3.07168	0.00212855	0.00907606
Lrp1b	protein_coding	ENSMUSG00000049252.17	36148.6	0.35656	0.092503	3.85458	0.000115927	0.000684976
Pole2	protein_coding	ENSMUSG00000020974.6	9615.47	0.356434	0.0842771	4.22931	2.34412e-05	0.000161165
Grk6	protein_coding	ENSMUSG00000074886.11	30114.5	0.35631	0.0781654	4.55842	5.15403e-06	3.99486e-05
Enox2	protein_coding	ENSMUSG00000031109.16	2400.42	0.356087	0.0921698	3.86338	0.000111831	0.000663964
Tmem9	protein_coding	ENSMUSG00000026411.17	4667.38	0.355776	0.07634	4.66041	3.1558e-06	2.54973e-05
Zfand2b	protein_coding	ENSMUSG00000026197.12	2372.86	0.355625	0.0929173	3.82733	0.000129538	0.00075739
Noc4l	protein_coding	ENSMUSG00000033294.11	20247.9	0.355622	0.0860161	4.13436	3.55938e-05	0.000234992
Lrpap1	protein_coding	ENSMUSG00000029103.16	17214.2	0.355433	0.0931613	3.81524	0.000136049	0.000790421
Ndrg3	protein_coding	ENSMUSG00000027634.14	8159.39	0.355406	0.074056	4.79915	1.59339e-06	1.35688e-05
As3mt	protein_coding	ENSMUSG00000003559.7	4749.94	0.355368	0.0854011	4.16116	3.16632e-05	0.000211139
Plp2	protein_coding	ENSMUSG00000031146.6	20736.9	0.355054	0.0892815	3.97679	6.98529e-05	0.000434785
Atp6v1f	protein_coding	ENSMUSG00000004285.12	13349.5	0.354957	0.0988525	3.59077	0.000329704	0.00175609
Unc13a	protein_coding	ENSMUSG00000034799.16	6370.02	0.354811	0.0947619	3.74424	0.000180942	0.00102385
Aip	protein_coding	ENSMUSG00000024847.14	6867.12	0.354635	0.102682	3.45374	0.000552879	0.00279233
Zfp689	protein_coding	ENSMUSG00000048921.11	2225.1	0.354564	0.092362	3.83885	0.000123611	0.000726881
Pcgf6	protein_coding	ENSMUSG00000025050.7	15681.7	0.354279	0.0817496	4.33371	1.46615e-05	0.000104212
Cep76	protein_coding	ENSMUSG00000073542.2	6348.23	0.354271	0.0817547	4.33335	1.46859e-05	0.000104325
Med27	protein_coding	ENSMUSG00000026799.15	4592.86	0.353337	0.0925604	3.81737	0.000134884	0.000785037
Gabarapl1	protein_coding	ENSMUSG00000030161.8	2133.61	0.353151	0.110773	3.18806	0.00143232	0.00644494
Atp6v1h	protein_coding	ENSMUSG00000033793.12	15146.3	0.352981	0.0763026	4.62607	3.72671e-06	2.96425e-05
Psmb2	protein_coding	ENSMUSG00000028837.8	30237.1	0.352674	0.086641	4.07052	4.69089e-05	0.000302307
Smim20	protein_coding	ENSMUSG00000061461.11	3581.15	0.35245	0.0839891	4.19638	2.71219e-05	0.000183899
Ap2m1	protein_coding	ENSMUSG00000022841.15	31853.7	0.352409	0.0739155	4.76772	1.86322e-06	1.56345e-05
Ilvbl	protein_coding	ENSMUSG00000032763.11	2471.62	0.352238	0.0837746	4.20459	2.61558e-05	0.000178086
Cdip1	protein_coding	ENSMUSG00000004071.13	11430.7	0.352172	0.0701649	5.0192	5.18865e-07	4.78142e-06
Psat1	protein_coding	ENSMUSG00000024640.9	91070.1	0.352111	0.071981	4.89172	9.99605e-07	8.77725e-06
Lmnb2	protein_coding	ENSMUSG00000062075.13	31231	0.352089	0.079202	4.44546	8.77058e-06	6.52052e-05
Zfp623	protein_coding	ENSMUSG00000050846.9	5199.22	0.352067	0.0804264	4.3775	1.20046e-05	8.68841e-05
Ethe1	protein_coding	ENSMUSG00000064254.6	2015.86	0.351878	0.111145	3.16594	0.00154583	0.0068714
Ybx1	protein_coding	ENSMUSG00000028639.14	214947	0.351786	0.089199	3.94383	8.01891e-05	0.000491653
Khnyn	protein_coding	ENSMUSG00000047153.4	6910.83	0.35177	0.0721514	4.87545	1.08562e-06	9.48846e-06
Rnd1	protein_coding	ENSMUSG00000054855.13	2807.18	0.351665	0.095359	3.68781	0.000226195	0.00125422
Zfp512b	protein_coding	ENSMUSG00000000823.16	5856.17	0.351519	0.0984563	3.5703	0.00035657	0.0018857
Acaa1b	protein_coding	ENSMUSG00000010651.4	1159.66	0.351285	0.109078	3.22049	0.00127973	0.00584389
Mmrn2	protein_coding	ENSMUSG00000041445.9	6497.78	0.35124	0.0740622	4.74251	2.11091e-06	1.75452e-05
Ptpn2	protein_coding	ENSMUSG00000024539.17	12247.9	0.351131	0.0788446	4.45345	8.45003e-06	6.29935e-05
Reep5	protein_coding	ENSMUSG00000005873.5	2753.34	0.351083	0.0908706	3.86355	0.000111753	0.000663662
Arhgef39	protein_coding	ENSMUSG00000051517.14	3669.88	0.350864	0.0975716	3.59596	0.000323195	0.00172628
Frg1	protein_coding	ENSMUSG00000031590.8	10477.6	0.350836	0.0901224	3.89288	9.90601e-05	0.000594748
Actr1a	protein_coding	ENSMUSG00000025228.4	25795.8	0.350648	0.0819731	4.2776	1.88919e-05	0.000132179
Copb1	protein_coding	ENSMUSG00000030754.9	22004.6	0.350581	0.0654521	5.3563	8.49429e-08	8.83421e-07
Eef1e1	protein_coding	ENSMUSG00000001707.8	16252.6	0.350404	0.0794694	4.40929	1.0371e-05	7.60911e-05
Eif2s3x	protein_coding	ENSMUSG00000035150.15	71945.3	0.350207	0.0698835	5.0113	5.40635e-07	4.96899e-06
Jup	protein_coding	ENSMUSG00000001552.14	41688	0.350186	0.0744655	4.70267	2.56787e-06	2.10516e-05
Sowahc	protein_coding	ENSMUSG00000098188.1	1974.64	0.349761	0.0926227	3.77619	0.000159245	0.000912209
Glo1	protein_coding	ENSMUSG00000024026.12	61611.5	0.349751	0.0848729	4.12088	3.77432e-05	0.000247984
Stard7	protein_coding	ENSMUSG00000027367.16	23099.2	0.349745	0.0771452	4.53359	5.79899e-06	4.46381e-05
Aqp3	protein_coding	ENSMUSG00000028435.8	20762.3	0.349588	0.0927246	3.77017	0.000163134	0.000931666
Rab3d	protein_coding	ENSMUSG00000019066.13	1274.74	0.349461	0.100389	3.48105	0.000499448	0.00255396
Soga1	protein_coding	ENSMUSG00000055485.6	4498.03	0.348978	0.0822844	4.24111	2.22413e-05	0.000153387
Mgst3	protein_coding	ENSMUSG00000026688.5	1804.42	0.348856	0.0977748	3.56796	0.000359775	0.00190122
Gmps	protein_coding	ENSMUSG00000027823.9	36205.3	0.348714	0.069331	5.0297	4.91237e-07	4.54727e-06
Tax1bp1	protein_coding	ENSMUSG00000004535.12	27495.3	0.348675	0.0749199	4.65397	3.25605e-06	2.62384e-05
Zfp768	protein_coding	ENSMUSG00000047371.7	1186.98	0.348593	0.102275	3.40839	0.000653483	0.0032314
Slc37a4	protein_coding	ENSMUSG00000032114.9	2049.58	0.348428	0.101535	3.43162	0.000599994	0.00300009
Taf8	protein_coding	ENSMUSG00000023980.6	15450.5	0.348043	0.0802901	4.33482	1.45878e-05	0.000103717
Knstrn	protein_coding	ENSMUSG00000027331.15	11458.7	0.347784	0.0816409	4.25992	2.04499e-05	0.00014201
Myl6	protein_coding	ENSMUSG00000090841.2	40527.9	0.347611	0.100376	3.46309	0.000534002	0.00271141
Rps7	protein_coding	ENSMUSG00000061477.4	201192	0.347373	0.102939	3.37455	0.000739359	0.00360601
U2af2	protein_coding	ENSMUSG00000030435.16	88015.6	0.347051	0.0872353	3.97833	6.94009e-05	0.000432301
Atxn1l	protein_coding	ENSMUSG00000069895.4	3708.2	0.346861	0.0918373	3.77691	0.000158785	0.000909998
Gnai1	protein_coding	ENSMUSG00000057614.6	3156.87	0.346857	0.0799253	4.33977	1.42632e-05	0.000101615
Slc3a2	protein_coding	ENSMUSG00000010095.13	51701.3	0.346813	0.0686375	5.05282	4.35325e-07	4.068e-06
Paics	protein_coding	ENSMUSG00000029247.17	122396	0.346169	0.0843066	4.10607	4.02441e-05	0.000263149
Tsen15	protein_coding	ENSMUSG00000014980.14	4316.73	0.346154	0.090902	3.80799	0.000140104	0.000811636
Chuk	protein_coding	ENSMUSG00000025199.16	13188.3	0.345781	0.0809215	4.27304	1.92823e-05	0.000134604
Wdr75	protein_coding	ENSMUSG00000025995.16	40474.8	0.345625	0.0741249	4.66274	3.12029e-06	2.52328e-05
Ift88	protein_coding	ENSMUSG00000040040.16	2549.29	0.345235	0.101837	3.39007	0.000698735	0.00342896
Nfu1	protein_coding	ENSMUSG00000029993.16	10374.2	0.345075	0.0815078	4.23365	2.29932e-05	0.000158173
RP23-300H4.1	protein_coding	ENSMUSG00000048087.6	42557.3	0.34468	0.0818802	4.20957	2.55859e-05	0.000174544
Tecr	protein_coding	ENSMUSG00000031708.16	31509.3	0.344289	0.0769192	4.47599	7.6059e-06	5.73088e-05
Comt	protein_coding	ENSMUSG00000000326.13	3542.6	0.344195	0.0924291	3.72388	0.000196186	0.00110124
Ccdc137	protein_coding	ENSMUSG00000049957.14	7215.61	0.343895	0.0835395	4.11655	3.84582e-05	0.000252412
Cry2	protein_coding	ENSMUSG00000068742.11	3136.11	0.343891	0.109689	3.13513	0.00171776	0.00754025
Cops4	protein_coding	ENSMUSG00000035297.14	24697.4	0.343692	0.0837839	4.10213	4.0937e-05	0.000267183
Rabl2	protein_coding	ENSMUSG00000022621.16	1612.03	0.343423	0.104086	3.29943	0.000968814	0.00457798
Gpi1	protein_coding	ENSMUSG00000036427.5	93424.8	0.343197	0.0695589	4.93391	8.0599e-07	7.19799e-06
Ssrp1	protein_coding	ENSMUSG00000027067.16	100427	0.343096	0.0696747	4.92425	8.4684e-07	7.53543e-06
Ssb	protein_coding	ENSMUSG00000068882.13	50929.3	0.342422	0.106918	3.20266	0.00136165	0.00616985
Ap3d1	protein_coding	ENSMUSG00000020198.8	48725.3	0.342308	0.0687496	4.97906	6.38939e-07	5.79666e-06
Dsp	protein_coding	ENSMUSG00000054889.10	3528.41	0.342183	0.100655	3.39955	0.000674966	0.00332426
Cmtm6	protein_coding	ENSMUSG00000032434.9	16629.5	0.341966	0.0687387	4.97487	6.52917e-07	5.91039e-06
Rbmx2	protein_coding	ENSMUSG00000031107.6	4246.21	0.341939	0.108408	3.15419	0.00160944	0.00710662
Iqce	protein_coding	ENSMUSG00000036555.14	4455.91	0.341834	0.0786156	4.34817	1.37278e-05	9.81713e-05
Zfp873	protein_coding	ENSMUSG00000061371.7	2880.13	0.341135	0.0879853	3.87718	0.000105672	0.000630597
RP23-189L19.6	protein_coding	ENSMUSG00000062753.14	1026.02	0.34109	0.106054	3.21619	0.00129903	0.00592212
Ccndbp1	protein_coding	ENSMUSG00000023572.16	4332.9	0.341078	0.0839567	4.06255	4.85395e-05	0.000311917
Usp30	protein_coding	ENSMUSG00000029592.11	6197.14	0.340527	0.0773282	4.40366	1.06441e-05	7.79556e-05
Calcoco1	protein_coding	ENSMUSG00000023055.10	4539.26	0.340414	0.102866	3.30928	0.000935351	0.00443692
Cntrl	protein_coding	ENSMUSG00000057110.15	10480.6	0.340363	0.073141	4.65351	3.26328e-06	2.6288e-05
Acer3	protein_coding	ENSMUSG00000030760.14	2113.5	0.340111	0.105338	3.22876	0.00124327	0.00569855
Itpa	protein_coding	ENSMUSG00000074797.11	21227.6	0.340018	0.0881586	3.85688	0.000114842	0.000678888
Tfrc	protein_coding	ENSMUSG00000022797.16	82577.2	0.339748	0.0641076	5.29966	1.16019e-07	1.18605e-06
Irf2bp1	protein_coding	ENSMUSG00000044030.4	6691.41	0.339657	0.0905441	3.75129	0.000175928	0.000997318
Rcn1	protein_coding	ENSMUSG00000005973.6	52297.6	0.339424	0.0836997	4.05526	5.0079e-05	0.000320887
Ccdc91	protein_coding	ENSMUSG00000030301.17	4431.4	0.33941	0.076071	4.46176	8.12909e-06	6.08592e-05
Rpl10	protein_coding	ENSMUSG00000008682.13	216753	0.339385	0.0932911	3.63791	0.000274855	0.00148977
Trmt10b	protein_coding	ENSMUSG00000035601.9	4462.63	0.339284	0.0827259	4.1013	4.10842e-05	0.000267859
44264	protein_coding	ENSMUSG00000040502.5	3447.03	0.339084	0.102075	3.32191	0.000894047	0.00425824
Dgka	protein_coding	ENSMUSG00000025357.8	3094.76	0.338975	0.086686	3.91038	9.21503e-05	0.000558169
Mus81	protein_coding	ENSMUSG00000024906.9	3718.91	0.338943	0.0916068	3.69998	0.000215619	0.00119937
Nktr	protein_coding	ENSMUSG00000032525.15	19191.9	0.338779	0.0834922	4.05761	4.9577e-05	0.000317919
Eea1	protein_coding	ENSMUSG00000036499.9	4053.32	0.338759	0.0871026	3.8892	0.000100577	0.000602971
Zfp317	protein_coding	ENSMUSG00000057551.10	19261.7	0.338665	0.0804849	4.20781	2.57859e-05	0.000175713
Cdc25a	protein_coding	ENSMUSG00000032477.14	31199.2	0.338558	0.0712061	4.75463	1.98814e-06	1.65975e-05
Prdx3	protein_coding	ENSMUSG00000024997.7	18077.9	0.338288	0.0911132	3.71283	0.000204952	0.0011452
Cenpn	protein_coding	ENSMUSG00000031756.5	11117.6	0.338247	0.0802536	4.21473	2.5008e-05	0.000171124
Abtb1	protein_coding	ENSMUSG00000030083.11	7588.78	0.338182	0.0892784	3.78795	0.000151896	0.00087439
Sik1	protein_coding	ENSMUSG00000024042.6	28554.1	0.338159	0.0777057	4.35179	1.35032e-05	9.68143e-05
Fbxo9	protein_coding	ENSMUSG00000001366.14	5343.69	0.338104	0.087651	3.85739	0.000114605	0.000678307
Rce1	protein_coding	ENSMUSG00000024889.4	7422.61	0.3379	0.0865137	3.90574	9.39374e-05	0.000567317
Ahsa2	protein_coding	ENSMUSG00000020288.13	7930.5	0.337837	0.0874908	3.8614	0.000112741	0.000668885
Trmt1l	protein_coding	ENSMUSG00000053286.11	7009.06	0.337783	0.080661	4.18768	2.81816e-05	0.000190297
Tyms	protein_coding	ENSMUSG00000025747.12	25922.7	0.337392	0.0687355	4.90855	9.17523e-07	8.10864e-06
Plrg1	protein_coding	ENSMUSG00000027998.11	22881.3	0.337063	0.0850742	3.96199	7.43274e-05	0.000460173
Slc35a1	protein_coding	ENSMUSG00000028293.14	6018.12	0.337061	0.0761584	4.42579	9.60912e-06	7.10739e-05
B4galt3	protein_coding	ENSMUSG00000052423.14	4867.73	0.336865	0.0865353	3.8928	9.9093e-05	0.0005948
Hdgf	protein_coding	ENSMUSG00000004897.16	112545	0.336601	0.0755874	4.45313	8.46269e-06	6.30688e-05
Stk17b	protein_coding	ENSMUSG00000026094.14	3021.3	0.336586	0.0966648	3.48199	0.000497704	0.00254557
Mtmr2	protein_coding	ENSMUSG00000031918.16	17889.8	0.336365	0.071983	4.67284	2.97059e-06	2.40563e-05
Ostm1	protein_coding	ENSMUSG00000038280.12	2693.31	0.336338	0.0985319	3.41349	0.000641358	0.0031804
Ddx19b	protein_coding	ENSMUSG00000033658.16	18395.1	0.336333	0.0690291	4.87234	1.10284e-06	9.61164e-06
Edrf1	protein_coding	ENSMUSG00000039990.16	16025.1	0.336191	0.0653681	5.14305	2.7032e-07	2.60631e-06
Tcirg1	protein_coding	ENSMUSG00000001750.15	3821.96	0.336085	0.0850187	3.95307	7.71551e-05	0.000475065
Gns	protein_coding	ENSMUSG00000034707.7	11032.6	0.336067	0.0745145	4.51009	6.48005e-06	4.94317e-05
Adpgk	protein_coding	ENSMUSG00000025236.11	17515.7	0.336002	0.0738289	4.55109	5.33691e-06	4.12361e-05
Hspa5	protein_coding	ENSMUSG00000026864.13	170022	0.335803	0.0878974	3.8204	0.000133238	0.00077699
Tmem177	protein_coding	ENSMUSG00000036975.5	2275.05	0.335498	0.105034	3.19418	0.00140228	0.00633167
Slc33a1	protein_coding	ENSMUSG00000027822.16	2074.95	0.335286	0.0877762	3.81979	0.000133567	0.000778722
Tstd2	protein_coding	ENSMUSG00000035495.15	7098.93	0.335089	0.0725454	4.61902	3.85558e-06	3.05489e-05
Crls1	protein_coding	ENSMUSG00000027357.16	5515.7	0.334908	0.0880485	3.80367	0.000142567	0.000824935
Lcmt2	protein_coding	ENSMUSG00000074890.4	2940.48	0.334874	0.0835334	4.00886	6.10116e-05	0.000384984
Fam92a	protein_coding	ENSMUSG00000028218.19	4569.79	0.334543	0.0968352	3.45477	0.00055076	0.00278449
Stard5	protein_coding	ENSMUSG00000046027.17	1793.82	0.334541	0.105129	3.18218	0.0014617	0.00654836
Tkt	protein_coding	ENSMUSG00000021957.7	157411	0.334273	0.0819372	4.07962	4.51097e-05	0.000291864
Cwc15	protein_coding	ENSMUSG00000004096.9	17720.9	0.334137	0.103804	3.21892	0.00128673	0.00587038
Strn4	protein_coding	ENSMUSG00000030374.15	23646.2	0.334102	0.0699888	4.77364	1.80923e-06	1.52126e-05
Psmc3	protein_coding	ENSMUSG00000002102.15	60837.7	0.334018	0.0971499	3.43817	0.000585656	0.0029361
Atp6v0e2	protein_coding	ENSMUSG00000039347.7	2083.02	0.334003	0.106605	3.13309	0.00172975	0.00758743
Ktn1	protein_coding	ENSMUSG00000021843.17	32588.5	0.333841	0.0707059	4.72155	2.34058e-06	1.92976e-05
Agap3	protein_coding	ENSMUSG00000023353.14	15352.2	0.33366	0.0783272	4.25982	2.04588e-05	0.00014201
Asph	protein_coding	ENSMUSG00000028207.18	12378.5	0.333614	0.0689529	4.83828	1.30965e-06	1.12821e-05
Icosl	protein_coding	ENSMUSG00000000732.9	1313.68	0.333458	0.10859	3.0708	0.00213486	0.00909665
Fez2	protein_coding	ENSMUSG00000056121.15	4212.75	0.333417	0.078311	4.25761	2.06625e-05	0.000143302
Ogdhl	protein_coding	ENSMUSG00000021913.8	18628.3	0.33269	0.0918396	3.62251	0.000291754	0.00157304
Nabp2	protein_coding	ENSMUSG00000025374.13	1905.42	0.332635	0.108683	3.0606	0.00220893	0.00937164
Fkbp4	protein_coding	ENSMUSG00000030357.10	169430	0.33247	0.0834665	3.98327	6.79733e-05	0.000424699
Eif4a2	protein_coding	ENSMUSG00000022884.15	100324	0.332216	0.0765286	4.34107	1.41789e-05	0.000101074
Coa4	protein_coding	ENSMUSG00000044881.7	2054.45	0.332197	0.100348	3.31045	0.000931471	0.00442107
Dgkq	protein_coding	ENSMUSG00000004815.12	4592.11	0.331578	0.0759052	4.36832	1.25205e-05	9.02727e-05
Gpr108	protein_coding	ENSMUSG00000005823.8	3709.58	0.331265	0.0990803	3.34339	0.0008276	0.00397721
Rnf123	protein_coding	ENSMUSG00000041528.15	2577.85	0.33056	0.105413	3.13584	0.00171363	0.0075248
Hsd17b4	protein_coding	ENSMUSG00000024507.6	13526.8	0.330552	0.0797524	4.14472	3.40225e-05	0.000225526
Tmem194b	protein_coding	ENSMUSG00000043015.15	2614.26	0.330506	0.100328	3.29426	0.000986819	0.00465233
Rnps1	protein_coding	ENSMUSG00000034681.16	41591.4	0.329918	0.0839376	3.93052	8.47631e-05	0.000516605
Tk2	protein_coding	ENSMUSG00000035824.7	3587.7	0.329888	0.0788514	4.18367	2.86843e-05	0.000193405
Rps6ka4	protein_coding	ENSMUSG00000024952.12	5886.31	0.329869	0.0855206	3.85719	0.000114697	0.000678688
Adipor2	protein_coding	ENSMUSG00000030168.13	38961.7	0.329852	0.0690879	4.77438	1.80262e-06	1.51674e-05
Rpf1	protein_coding	ENSMUSG00000028187.10	15673.6	0.329785	0.0872849	3.77826	0.000157929	0.000905532
Ddb1	protein_coding	ENSMUSG00000024740.9	198324	0.329685	0.0655645	5.0284	4.94583e-07	4.5748e-06
Ncbp1	protein_coding	ENSMUSG00000028330.8	9110.63	0.329371	0.0767477	4.29161	1.77385e-05	0.000124605
Sec23b	protein_coding	ENSMUSG00000027429.16	26221.7	0.32897	0.0748105	4.39737	1.09568e-05	8.00787e-05
Itga6	protein_coding	ENSMUSG00000027111.15	47402.2	0.328827	0.0734501	4.47687	7.57457e-06	5.70903e-05
Arhgap9	protein_coding	ENSMUSG00000040345.10	1983.13	0.328643	0.095443	3.44334	0.000574567	0.00288941
Nasp	protein_coding	ENSMUSG00000028693.15	124516	0.328582	0.0831856	3.94999	7.81536e-05	0.000480611
Plin3	protein_coding	ENSMUSG00000024197.9	21300.7	0.328224	0.0892756	3.67652	0.000236435	0.00130307
Gtf2f1	protein_coding	ENSMUSG00000002658.9	24844.3	0.328083	0.105853	3.09942	0.00193899	0.00838136
Flot2	protein_coding	ENSMUSG00000061981.14	6606.76	0.327921	0.0793719	4.13145	3.60477e-05	0.000237861
Rad50	protein_coding	ENSMUSG00000020380.16	9477.34	0.327749	0.0728891	4.49654	6.90672e-06	5.241e-05
Slc25a12	protein_coding	ENSMUSG00000027010.16	27150.2	0.327732	0.0829743	3.9498	7.82181e-05	0.000480888
Dync1i2	protein_coding	ENSMUSG00000027012.15	16862	0.326984	0.0875434	3.73511	0.000187636	0.00105837
Plpp3	protein_coding	ENSMUSG00000028517.8	3554.24	0.326877	0.080953	4.03786	5.39402e-05	0.000343124
Ubac2	protein_coding	ENSMUSG00000041765.6	14713.2	0.326845	0.0667895	4.89365	9.89823e-07	8.69757e-06
[truncated: 3,468 more rows]
