# Supplementary figures and images for: SIRT1 regulates sphingolipid metabolism and neural differentiation of mouse embryonic stem cells through c-Myc-SMPDL3B
Source: eLife journal article supplement (doi:10.7554/elife.67452), 2021-05-27

**A**

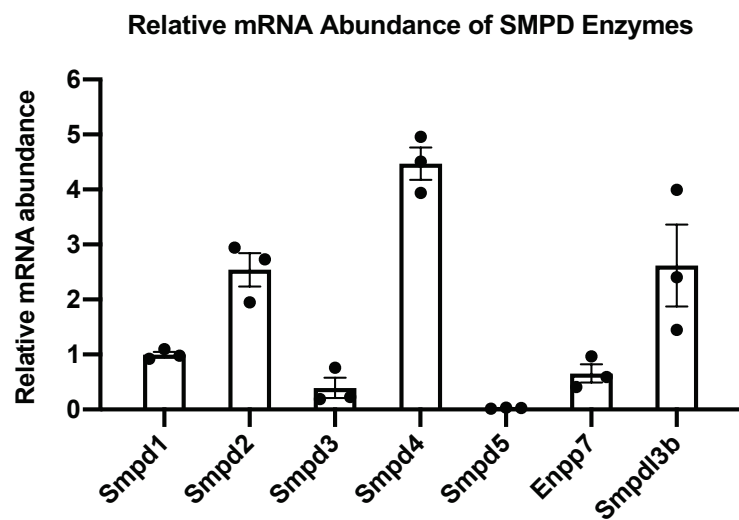

**B**

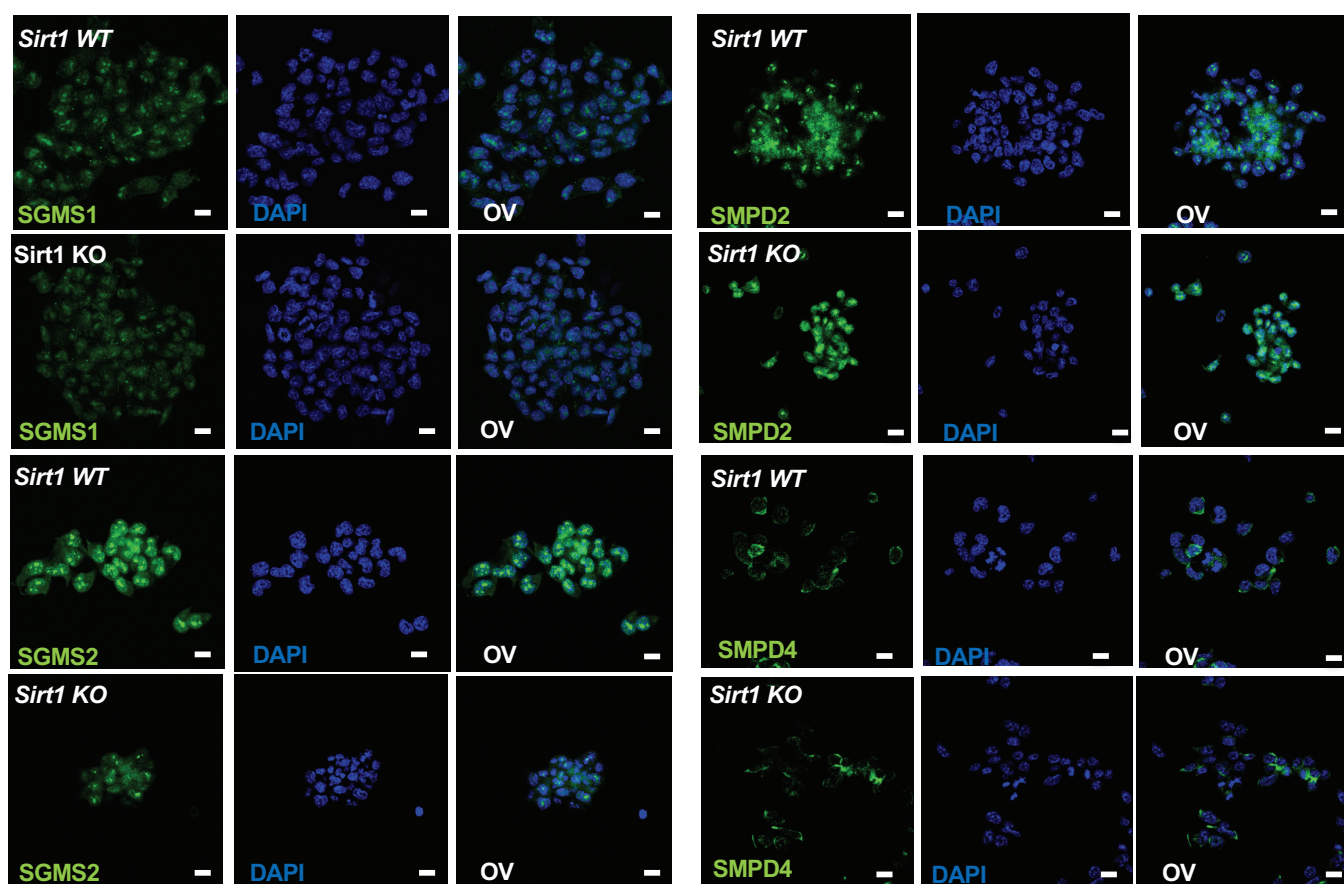

Supplement: supp [file elife_poa_e67452_Figure_2_figure_supplement_1.pdf › elife_poa_e67452_Figure_2_figure_supplement_1.pdf]

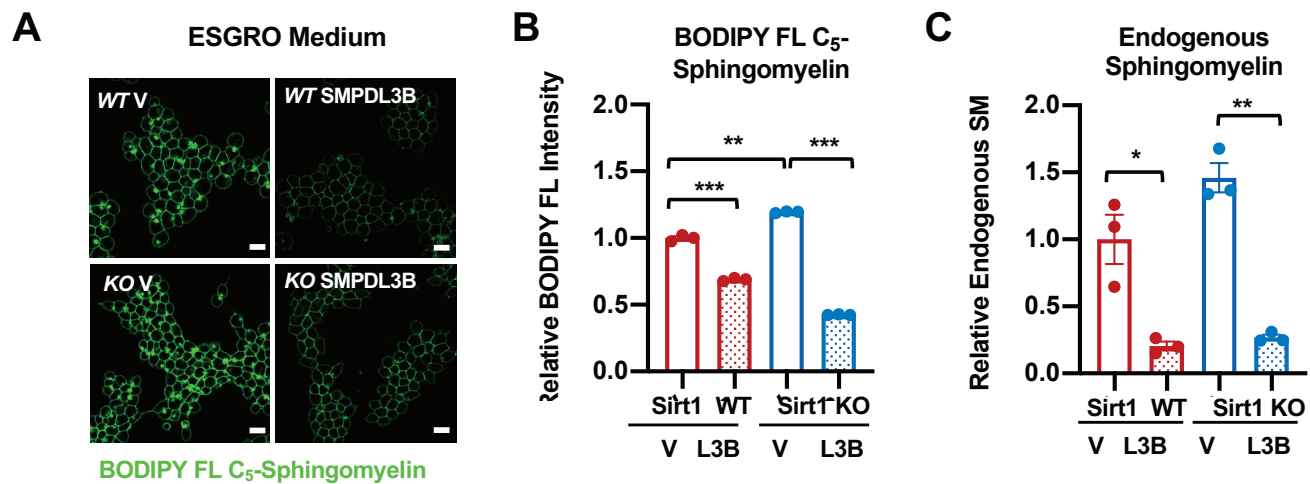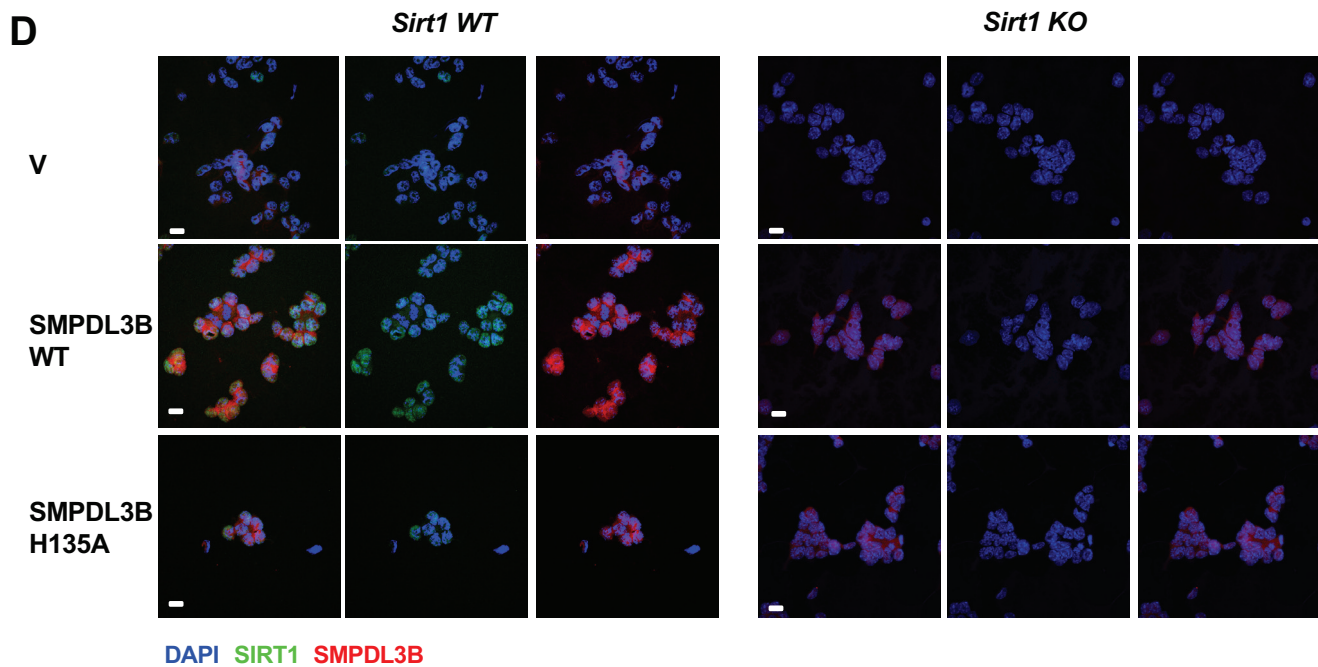

Supplement: supp [file elife_poa_e67452_Figure_3_figure_supplement_1.pdf › elife_poa_e67452_Figure_3_figure_supplement_1.pdf]

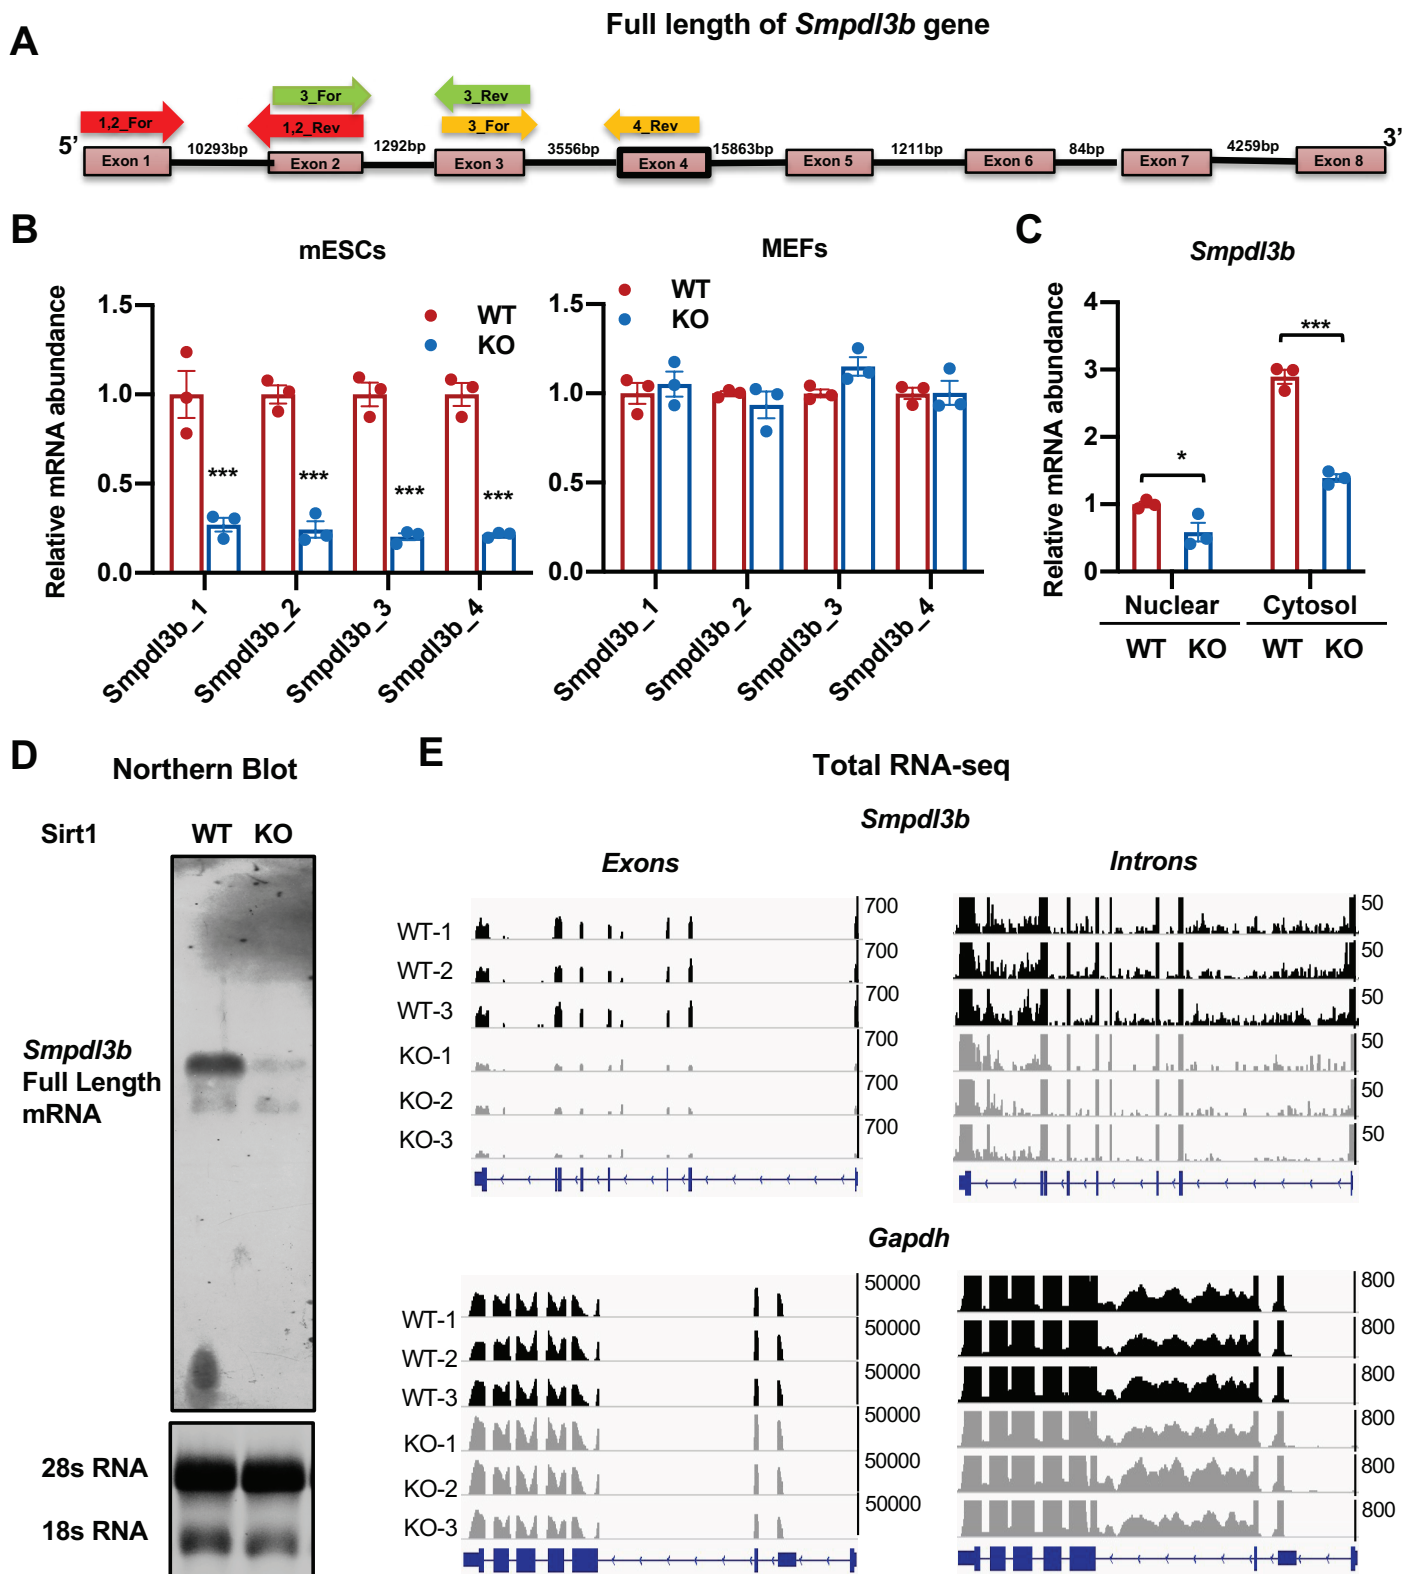

Supplement: supp [file elife_poa_e67452_Figure_5_figure_supplement_1.pdf › elife_poa_e67452_Figure_5_figure_supplement_1.pdf]

# A Position of sgRNA sequences for *Smpd3b* gene

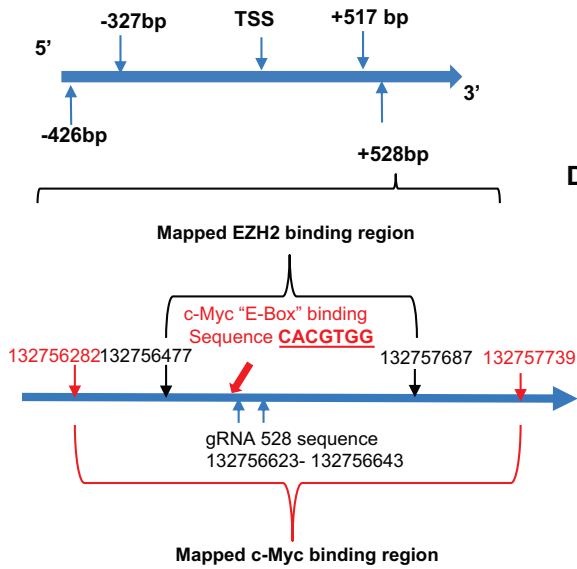

# B

dCas9 induction with doxycycline

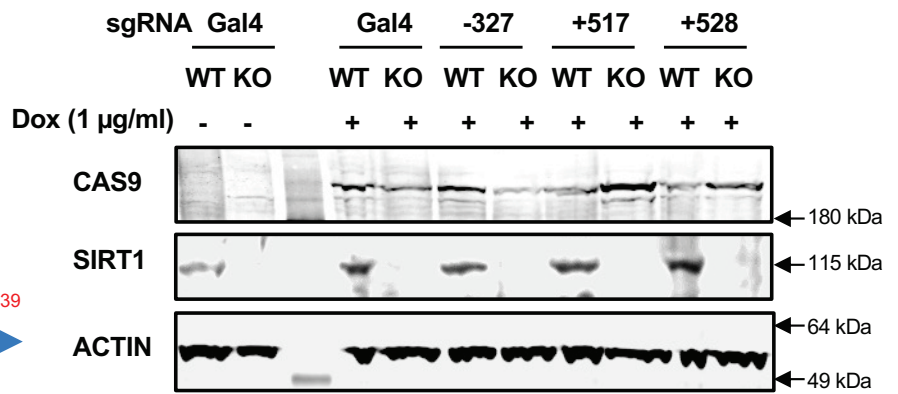

# C

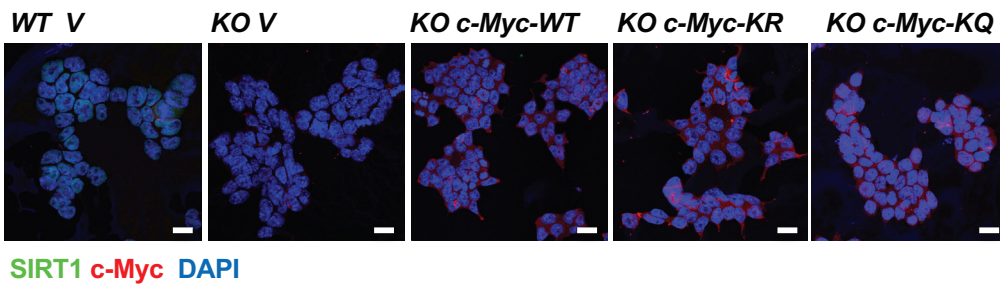

# D

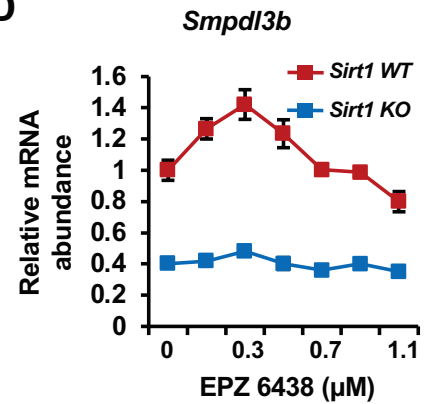

# E

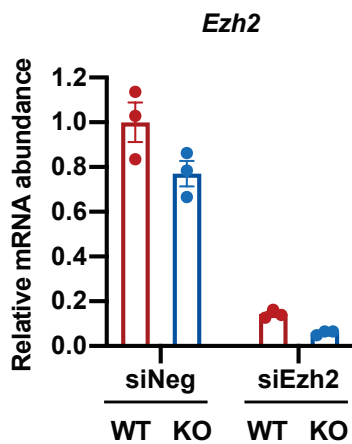

# F

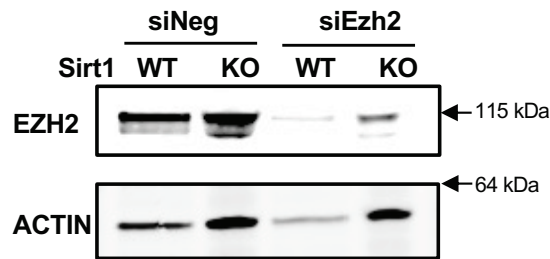

# G

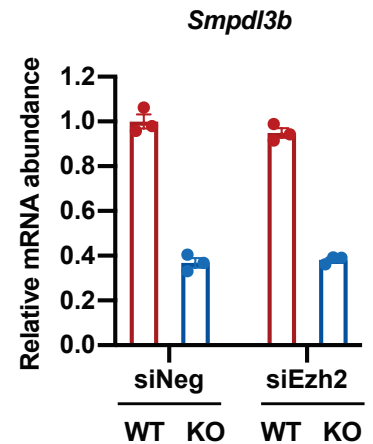

Supplement: supp [file elife_poa_e67452_Figure_5_figure_supplement_2.pdf › elife_poa_e67452_Figure_5_figure_supplement_2.pdf]

**A** Functional annotation of 2541 significantly down-regulated genes in SIRT1 KO mESCs

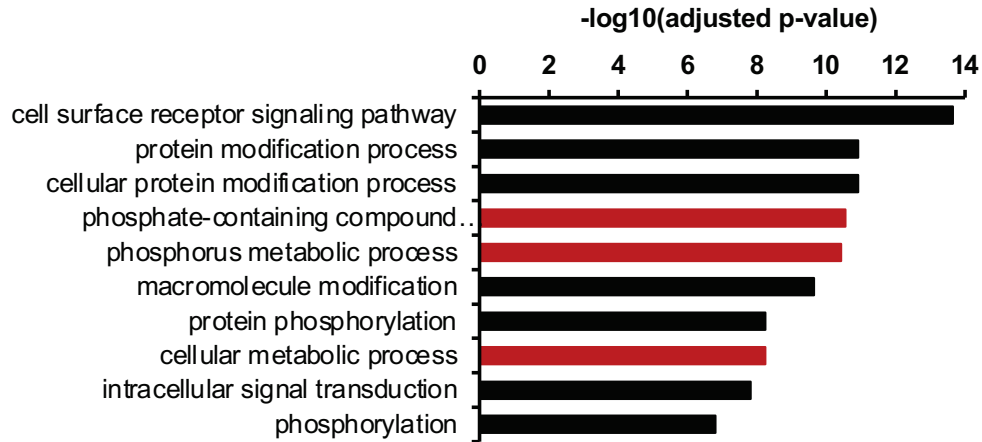

**B**

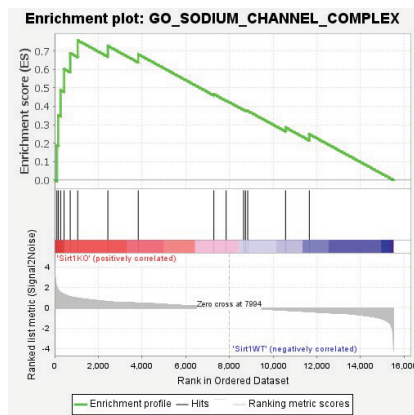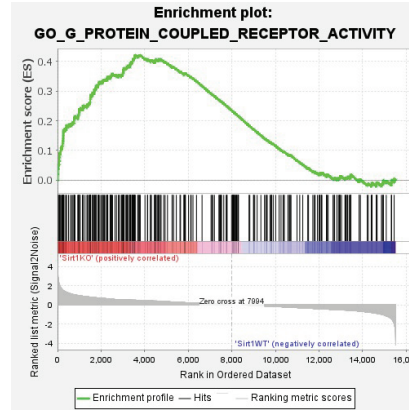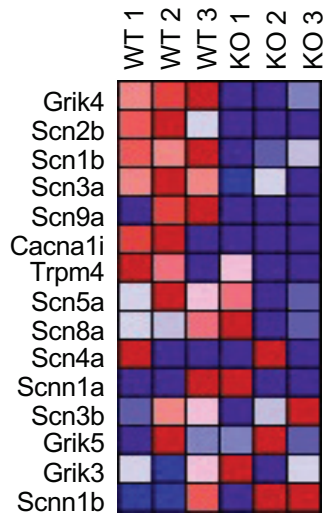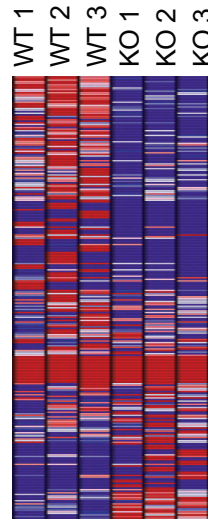

Supplement: supp [file elife_poa_e67452_Figure_6_figure_supplement_1.pdf › elife_poa_e67452_Figure_6_figure_supplement_1.pdf]
